# Supplementary material for: Selective C(sp3)–H bond aerobic oxidation enabled by a π-conjugated small molecule-oxygen charge transfer state
Source: Royal Society of Chemistry journal article supplement (doi:10.1039/d4gc02010c), 2024-01-01
Supplement: d4gc02010c1.pdf [file d4gc02010c1.pdf]

## Supporting Information

### **Selective C(sp<sup>3</sup>)-H bond Aerobic Oxidation Enabled by $\pi$ -Conjugated Small Molecule-Oxygen Charge Transfer State**

Panyi Huang, Yan Xu, Haijing Song, Jiayin Wang, Jiayang Wang, Jianjun Li, Bin Sun\* and Can Jin\*

## *Table of Contents*

|                                                                  |    |
|------------------------------------------------------------------|----|
| 1. General consideration.....                                    | 1  |
| 2. General procedures of starting materials.....                 | 2  |
| 3. General procedure.....                                        | 3  |
| 4. Mechanism investigation.....                                  | 5  |
| 5. Characterization data for the products.....                   | 20 |
| 6. References.....                                               | 45 |
| 7. $^1\text{H}$ and $^{13}\text{C}$ spectra of the products..... | 46 |

## 1. General consideration

Unless otherwise specified, all reagents and solvents were obtained from commercial suppliers and used without further purification. The NMR spectra were recorded on a Bruker Avance 400 or 600 spectrometer at 400 MHz or 600MHz in  $\text{CDCl}_3$  using tetramethylsilane as the internal standard. Chemical shifts ( $\delta$ ) are reported in ppm and coupling constants (J) in hertz (Hz).  $^1\text{H}$  and  $^{13}\text{C}$  Nuclear Magnetic Resonance (NMR) spectra were acquired at various field strengths as indicated and were referenced to  $\text{CHCl}_3$  (7.27 and 77.16 ppm for  $^1\text{H}$  and  $^{13}\text{C}$  respectively). The following abbreviations were used to explain the multiplicities: s = singlet, d = doublet, dd = doublet of doublet, t = triplet, dt = doublet of triplet, td = triplet of doublet, q = quartet, m = multiplet, ddd = doublet of doublet of doublet. High-resolution mass spectra were obtained using a Bruker Impact II UHR-QTOF mass spectrometer. Spectra were obtained using electron impact ionization (EI) and chemical ionization (CI) techniques, or positive electrospray (ES). UV-Vis absorption spectra were recorded on Mapada P6. Column chromatography was performed on silica gel (200–300 mesh). All mixed solvent eluents are reported as v/v solutions. The LEDs used are Kessil PR160L-370 nm Gen 2, Kessil PR160L-390 nm, Kessil PR160L-427 nm.

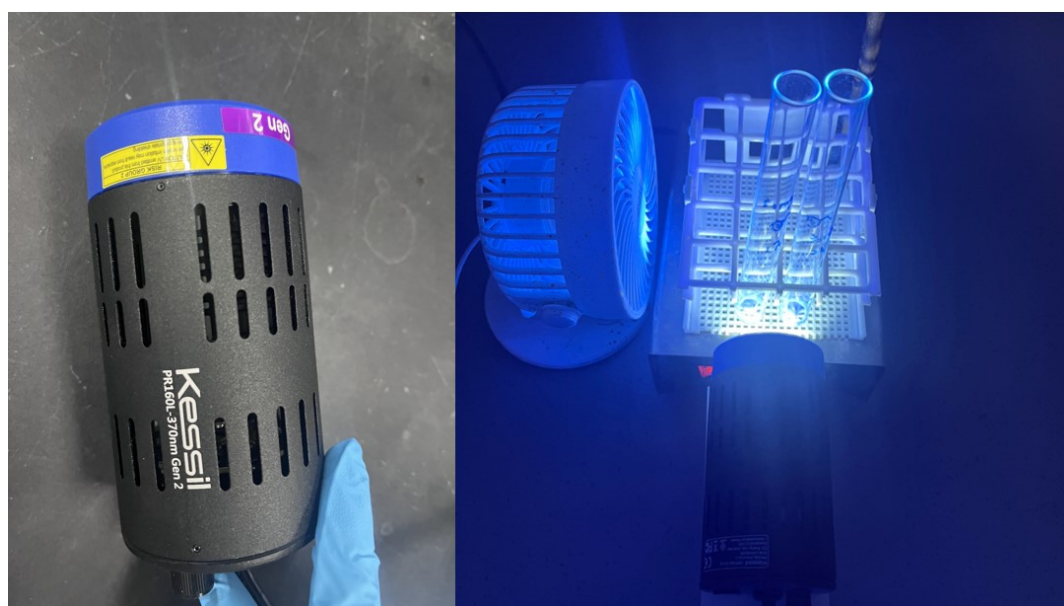

Figure S1 (Photographed by author Panyi Huang)

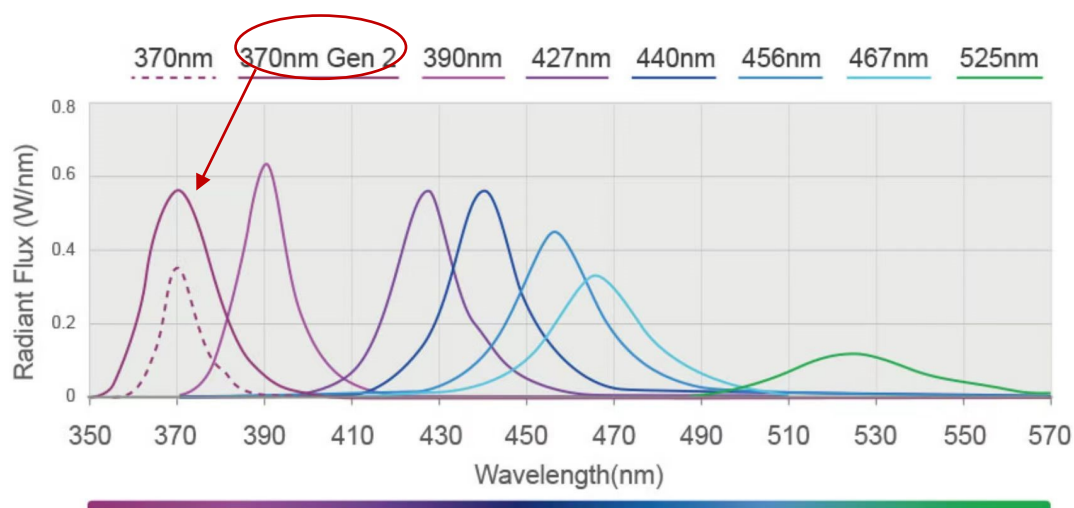

Figure S2 Spectral range of Kessil PR160L-370 nm Gen 2

## 2. General procedures of starting materials.

### Complex precursors containing benzy $sp^3$ C-H bonds

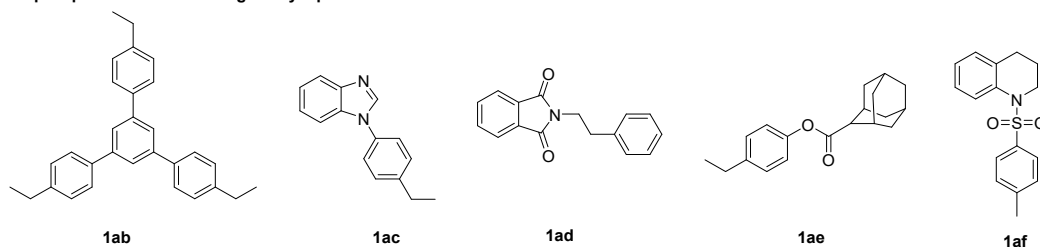

### Alkylbenzenes containing pharmaceutical structures

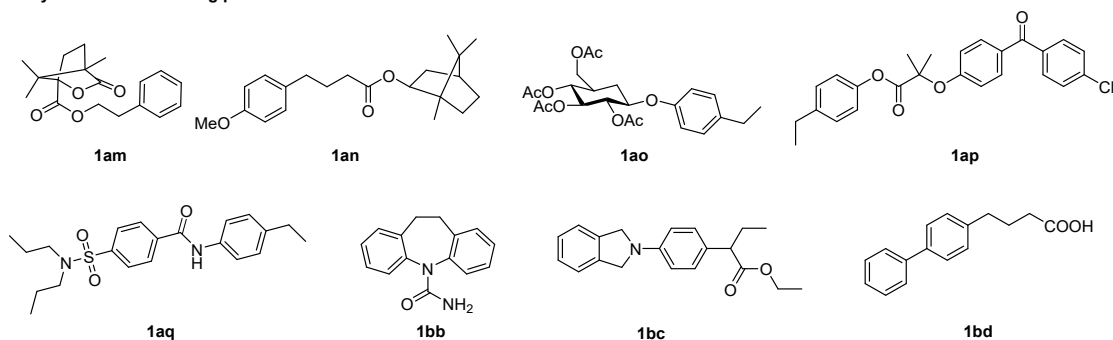

The  $\pi$ -conjugated compounds, which were used in the synthesis of products **3a-3aa**, **3ag-3am**, **3as-3aaa**, **4a-4i** were purchased from commercial sources and used without further purification. The ester and amide derivatives **1ae**, **1am**, **1an**, **1ap**, and **1aq** were prepared according to the literature.<sup>1</sup> **1ab**<sup>[2a]</sup>, **1ac**<sup>[2b]</sup>, **1ad**,<sup>[2c]</sup> **1af**<sup>[2d]</sup>, **1ao**

<sup>[2e]</sup>, **1bb** <sup>[2f]</sup>, **1bc**, <sup>[2g]</sup>, **1bd** <sup>[2h]</sup> were prepared following the literature procedures.

### 3. General Procedures

#### 3.1 General procedure A for Selective C(sp<sup>3</sup>)-H bond Aerobic Oxidation

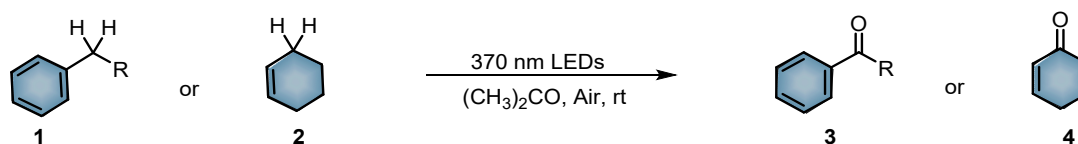

A mixture of arenes **1** (0.3 mmol) or alkenes **2** (0.2 mmol), and acetone (1.5 mL) were added to a reaction tube. The reaction mixture was open to the air and stirred at room temperature under the irradiation of an LED lamp (Kessil PR160L-370 nm Gen 2) for 1-24 h until the reaction was completed as monitored by TLC. After completion of the reaction, the resulting mixture was diluted with water and then extracted with CH<sub>2</sub>Cl<sub>2</sub>. The obtained organic phase was removed under a vacuum, and the residue was purified by column chromatography using a mixture of petroleum ether and ethyl acetate as eluent to give the desired product.

#### 3.2 The Sun Light Experiment

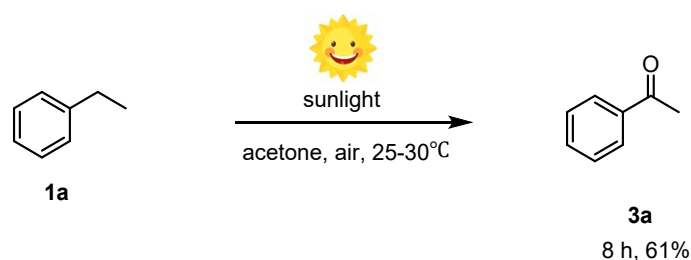

A mixture of ethylbenzene **1a** (0.3 mmol), and acetone (1.5 mL) were added to a reaction tube. The reaction mixture was exposed to air and stirred under sunlight for 8h. After completion of the reaction, the resulting mixture was diluted with water and then extracted with CH<sub>2</sub>Cl<sub>2</sub>. The obtained organic phase was removed under a vacuum, and the residue was purified by column chromatography using a mixture of petroleum ether and ethyl acetate as eluent to give the desired product **3a** with 61% yield.

### 3.3 The Gram Scale Reaction

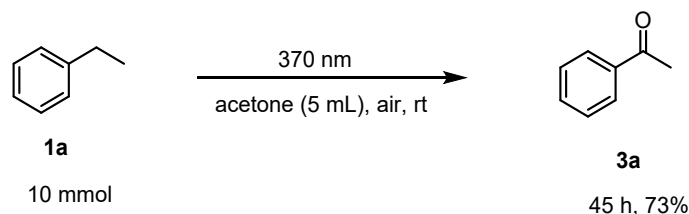

A mixture of ethylbenzene **1a** (10 mmol), and acetone (5 mL) were added to a 100 mL reaction tube. The reaction mixture was open to the air and stirred at room temperature under the irradiation of an LED lamp (Kessil PR160L-370 nm Gen 2) for 45 h. After completion of the reaction, the resulting mixture was diluted with water and then extracted with CH<sub>2</sub>Cl<sub>2</sub>. The obtained organic phase was removed under a vacuum, and the residue was purified by column chromatography using a mixture of petroleum ether and ethyl acetate as eluent to give the desired product **3a** with 73% yield.

### 3.4 Optimizations of the Reaction Conditions

**Table S1.** Optimization of solvent.<sup>a</sup>

Reaction scheme showing the conversion of ethylbenzene (**1a**) to acetophenone (**3a**) under 370 nm irradiation, solvent, air, and room temperature (rt).

| Entry | solvent                              | Yield (%) <sup>b</sup> |
|-------|--------------------------------------|------------------------|
| 1     | cyclohexane                          | NR                     |
| 2     | EA                                   | 17                     |
| 3     | THF                                  | 10                     |
| 4     | (CH <sub>2</sub> ) <sub>4</sub> CO   | 18                     |
| 5     | (CH <sub>3</sub> ) <sub>2</sub> CO   | 79                     |
| 6     | (CD <sub>3</sub> ) <sub>2</sub> CO   | 81 <sup>8h</sup>       |
| 7     | (CH <sub>3</sub> ) <sub>2</sub> CHCN | 78                     |
| 8     | ACN                                  | 63                     |
| 9     | DMSO                                 | 16                     |

<sup>a</sup>Reaction conditions: **1a** (0.3 mmol), solvent (1.5 mL), air, rt, 24 h irradiated under 370 nm. [b] Isolated

yield.



**Table S2.** Light source experiment.<sup>a</sup>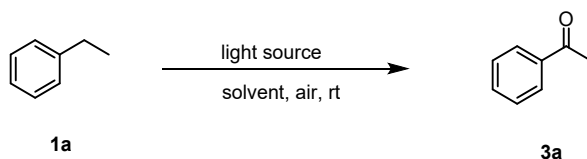

| Entry | Light source | additive                             | Yield (%) <sup>b</sup> |
|-------|--------------|--------------------------------------|------------------------|
| 1     | 390 nm       | cyclohexane                          | NR                     |
| 2     | 390 nm       | EA                                   | trace                  |
| 3     | 390 nm       | (CH <sub>3</sub> ) <sub>2</sub> CO   | 16%                    |
| 4     | 390 nm       | (CH <sub>3</sub> ) <sub>2</sub> CHCN | 16%                    |
| 5     | 390 nm       | ACN                                  | 12%                    |
| 6     | 390 nm       | DMSO                                 | trace                  |
| 7     | 427 nm       | cyclohexane                          | NR                     |
| 8     | 427 nm       | EA                                   | NR                     |
| 9     | 427 nm       | (CH <sub>3</sub> ) <sub>2</sub> CO   | trace                  |
| 10    | 427 nm       | (CH <sub>3</sub> ) <sub>2</sub> CHCN | trace                  |
| 11    | 427 nm       | ACN                                  | trace                  |
| 12    | 427 nm       | DMSO                                 | trace                  |

<sup>a</sup>Reaction conditions: **1a** (0.3 mmol), solvent (1.5 mL), air, rt, 24 h irradiated under 390 nm or 427 nm.

[b] Isolated yield.

## 4. Mechanistic Studies

### 4.1 Oxygen concentration experiments

A mixture of ethylbenzene **1a** (0.3 mmol), inhibitor (0.45 mmol), and acetone (1.5 mL) were added to a reaction tube. Three tubes of reaction mixtures were collapsed with balloons containing different oxygen concentrations (0%, 20%, 100%) and stirred at room temperature under the irradiation of an LED lamp (Kessil PR160L-370 nm Gen 2) for 12 h. After completion of the reaction, the resulting mixture was diluted with water and then extracted with CH<sub>2</sub>Cl<sub>2</sub>. The obtained organic phase was removed under a vacuum, and the residue was purified by column chromatography using a mixture of

petroleum ether and ethyl acetate as eluent to give the desired product. The results showed that oxygen was necessary and the rate of oxidation accelerated in an oxygen atmosphere (Figure S3).

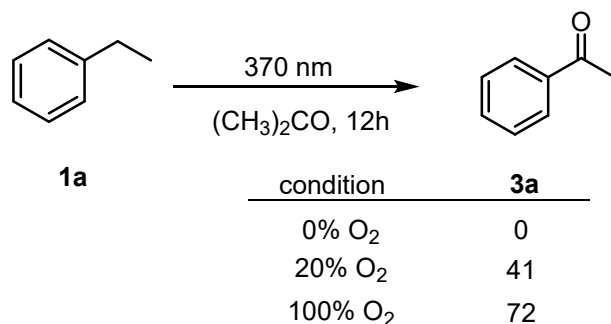

**Figure S3.** Oxygen concentration experiments

## 4.2 Exploring Active Oxygen Experiments

A mixture of ethylbenzene **1a** (0.3 mmol), inhibitor (0.45 mmol), and acetone (1.5 mL) were added to a reaction tube. The reaction mixture was open to the air and stirred at room temperature under the irradiation of an LED lamp (Kessil PR160L-370 nm Gen 2) for 24 h. After completion of the reaction, the resulting mixture was diluted with water and then extracted with CH<sub>2</sub>Cl<sub>2</sub>. The obtained organic phase was removed under a vacuum, and the residue was purified by column chromatography using a mixture of petroleum ether and ethyl acetate as eluent to give the desired product.

**Table S3.** Active oxygen inhibitor experiment.<sup>a</sup>

| Entry | inhibitor              | Active oxygen               | Yield (%) <sup>b</sup> |
|-------|------------------------|-----------------------------|------------------------|
| 1     | <i>t</i> -BuOH         | •OH                         | 79                     |
| 2     | <i>p</i> -benzoquinone | O <sub>2</sub> <sup>-</sup> | 79                     |
| 3     | DPBF                   | <sup>1</sup> O <sub>2</sub> | 18 + <b>5a</b>         |
| 4     | DPA                    | <sup>1</sup> O <sub>2</sub> | 0                      |
| 5     | carotenoids            | <sup>1</sup> O <sub>2</sub> | 0                      |

<sup>a</sup>Reaction conditions: **1a** (0.3 mmol), inhibitor (0.45 mmol), acetone (1.5 mL), air, rt, 24 h irradiated under 370 nm. <sup>[b]</sup> Isolated yield.

### Entry 3

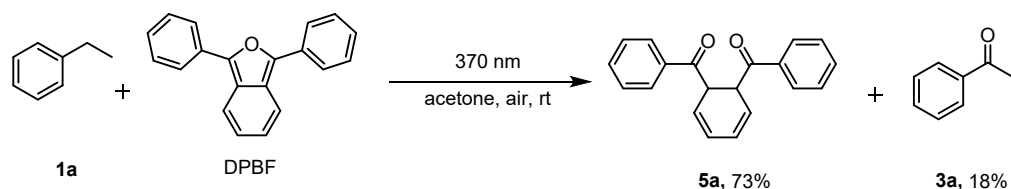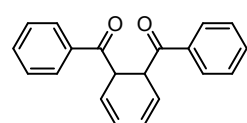

cyclohexa-3,5-diene-1,2-diylbis(phenylmethanone) (**5a**)<sup>3</sup>: <sup>1</sup>H NMR (400 MHz, CDCl<sub>3</sub>) δ 7.73 (d, *J* = 8.1 Hz, 4H), 7.65 (s, 4H), 7.57 – 7.51 (m, 2H), 7.40 (t, *J* = 7.7 Hz, 4H). <sup>13</sup>C NMR (101 MHz, CDCl<sub>3</sub>) δ 196.63, 140.02, 137.18, 133.03, 130.39, 129.84, 129.69, 128.35.

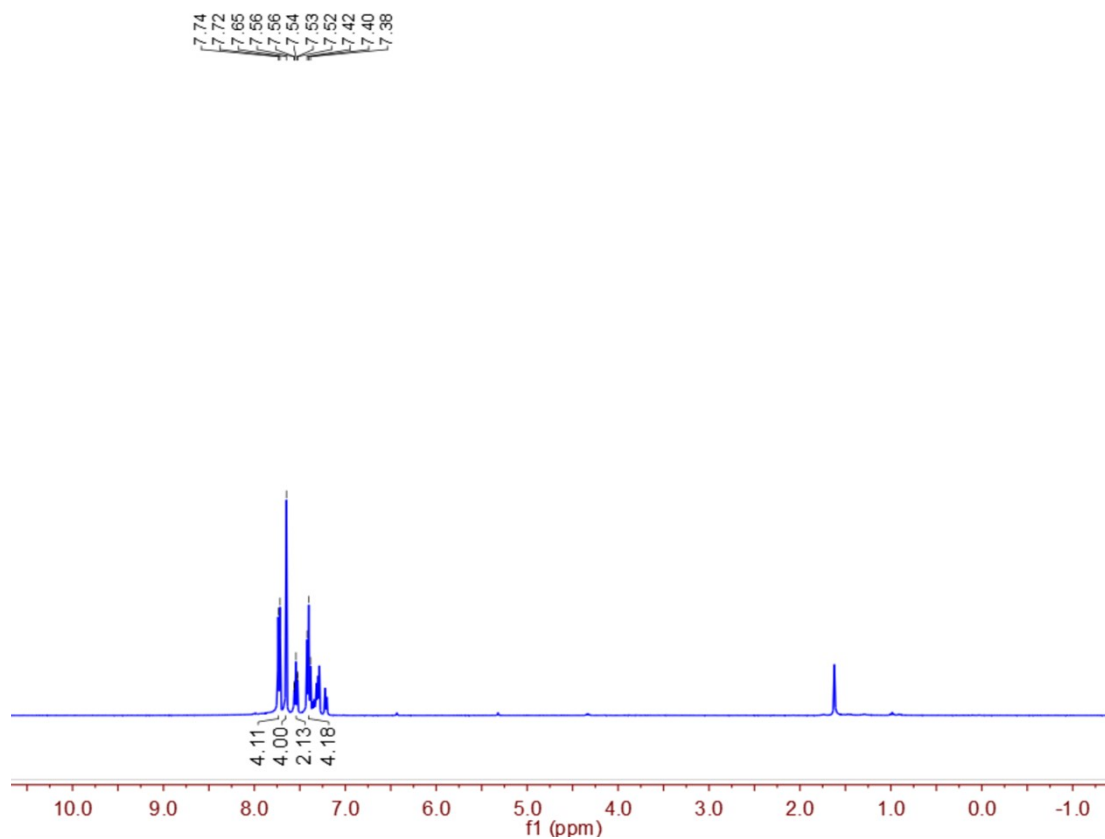

**Figure S4.** <sup>1</sup>H NMR spectra of the adduct **5a**.

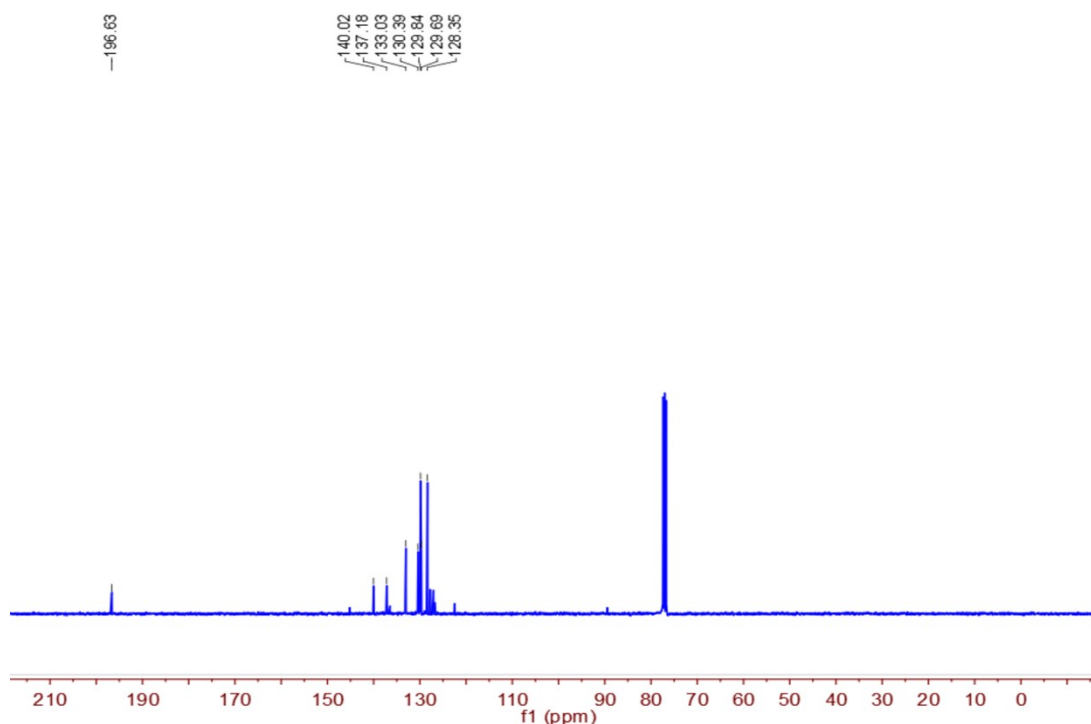

**Figure S5.**  $^{13}\text{C}$  NMR spectra of the adduct **5a**.

### 4.3 EPR spectra (Capture of singlet oxygen)

For further explore the active species of singlet oxygen involved in the reaction, 2,2,6,6-tetramethylpiperidine (TEMP) were used to trap  $^1\text{O}_2$  ( $g = 2.0065$ ). Irradiation of the reaction solution of TEMP with ethylbenzene **1a** in acetone under air with 370 nm resulted in the formation of a strong characteristic signal  $^1\text{O}_2$  adduct with TEMP (Figure S6), implying that  $^1\text{O}_2$  is also present during the reaction.

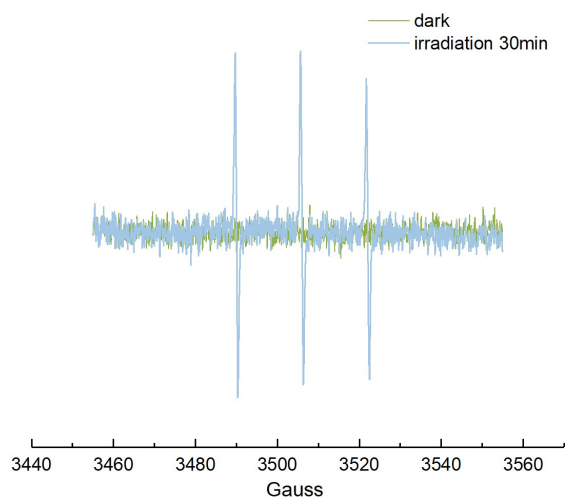

**Figure S6.** Electron spin resonance (ESR) spectra of TEMP with  $^1\text{O}_2$

- (a) A solution of TEMP (0.20 mol/L) with ethylbenzene **1a** in air-saturated acetone without light irradiation.
- (b) A solution of TEMP (0.20 mol/L) with ethylbenzene **1a** in air-saturated acetone under purple LEDs irradiation for 30 min.

#### 4.4 UV/Vis Studies

UV/vis absorption spectra were measured in a 10 cm quartz cuvette using a P6. The UV-Vis absorption spectra of toluene (1M, in ACN) after a 5 min nitrogen bubble were recorded (Figure S7 blue line). Subsequent oxygen bubbling of the solution for 5 min resulted in a red shift in the tail of the absorption peak, which was attributed to the toluene-O<sub>2</sub> CT band (red line). After introducing nitrogen into the solution again for 5 min, the absorption peaks match well with solution of the first nitrogen bubble (green line), indicating that the additional absorption is not caused by oxidation products or impurities. Additional absorption peaks were also observed in acetone (red line) and cyclohexane (green line), and the tail of the absorption band extended to 420 nm in polar solvents (Figure S8).

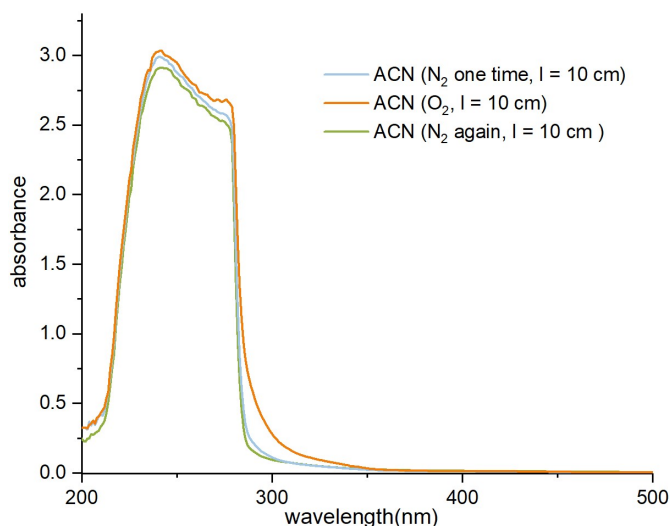

**Figure S7 Absorption spectra: toluene (1M, in ACN)**

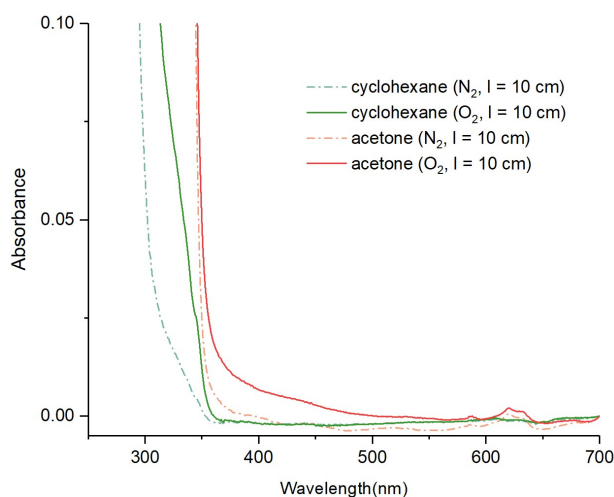

**Figure S8. Absorption spectra: toluene (1M, in cyclohexane and acetone)**

The absorption spectroscopy experiments of olefin **2c** were carried out, and the results are presented in As shown in Figure 9. It can be observed that the absorption tail extended to 390 nm after a 5-min oxygen bubbling process (solid yellow line), providing evidence for the formation of a charge transfer (CT) state between olefin **2c** and oxygen. In addition, the absorption curve of pure acetone solvents was measured. The absorption curves of pure acetone after oxygen bubbling remained consistent with those after nitrogen bubbling operations, thereby confirming that the red shift of the absorption curves (solid yellow line) is attributed to the interaction between **2c** and oxygen.

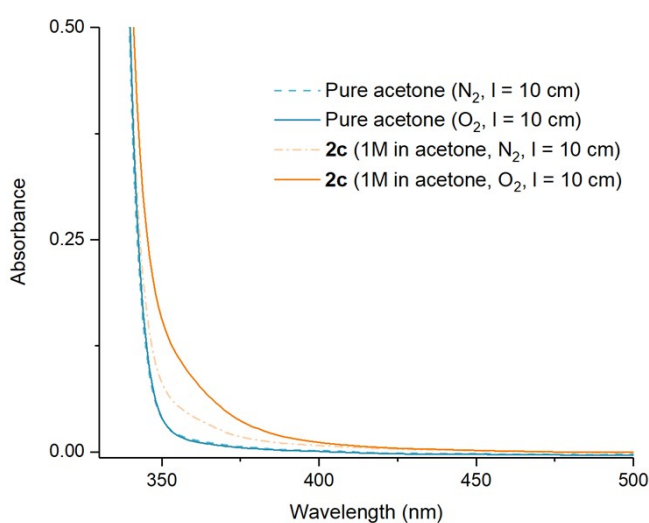

**Figure S9. Absorption spectra: pure acetone solvent and 2c (1M, in acetone)**

## 4.5 E→Z isomerization (Demonstration of triplet excited states)

### A. trans-stilbene E→Z isomerization

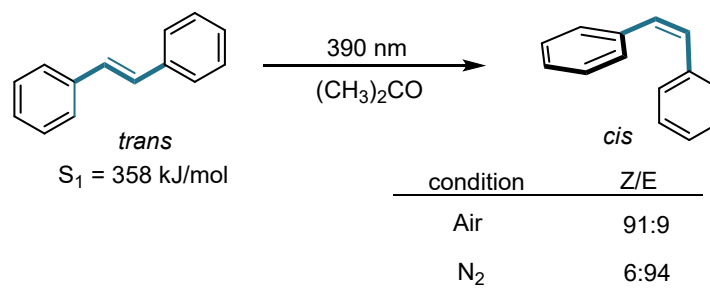

A mixture of trans-stilbene (0.3 mmol), and acetone (1.5 mL) were added to a reaction tube. One tube was open to the air and stirred at room temperature. Another tube was evacuated and backfilled with  $\text{N}_2$  for three times. After irradiation of an LED lamp (Kessil PR160L-390 nm) for 9 h, the resulting mixture was diluted with water and then extracted with  $\text{CH}_2\text{Cl}_2$ . The obtained organic phase was removed under a vacuum, and the residue was purified by column chromatography using a mixture of petroleum ether and ethyl acetate as eluent to give the desired product. The trans-stilbene provides a 91:9 Z/E in an air atmosphere. While only trace cis-stilbene was observed under nitrogen atmosphere.

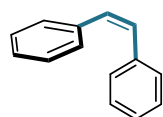

*cis*-stilbene<sup>3a</sup>:  $^1\text{H NMR}$  (400 MHz,  $\text{CDCl}_3$ )  $\delta$  7.33 – 7.22 (m, 10H), 6.66 (s, 2H).  $^{13}\text{C NMR}$  (101 MHz,  $\text{CDCl}_3$ )  $\delta$  137.29, 130.29, 128.91, 128.25, 127.13.

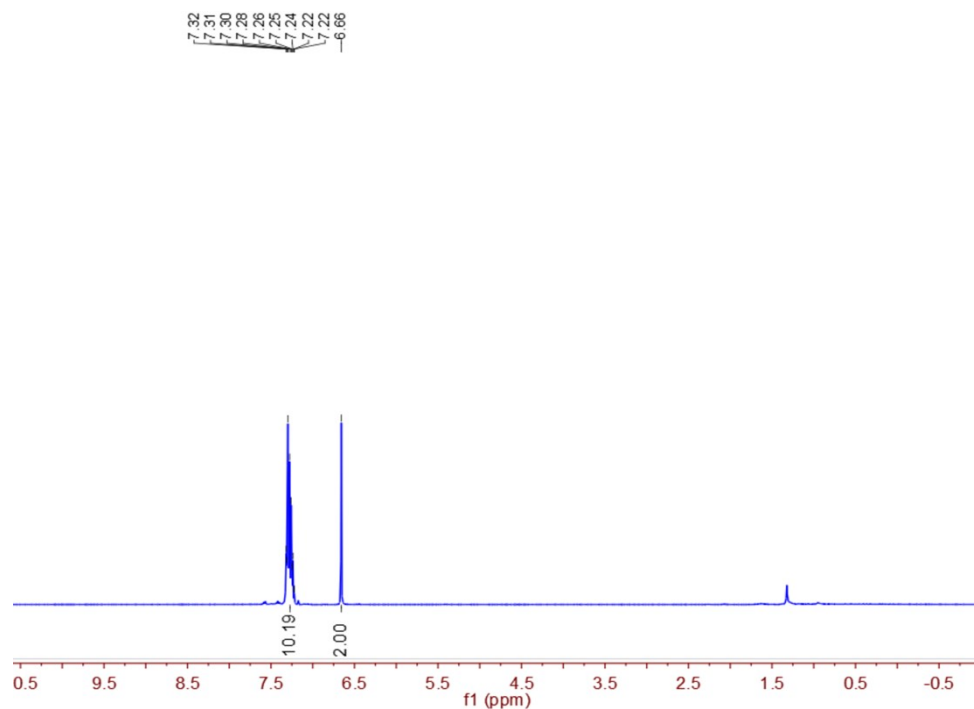

**Figure S10.**  $^1\text{H}$  NMR spectra of cis-stilbene.

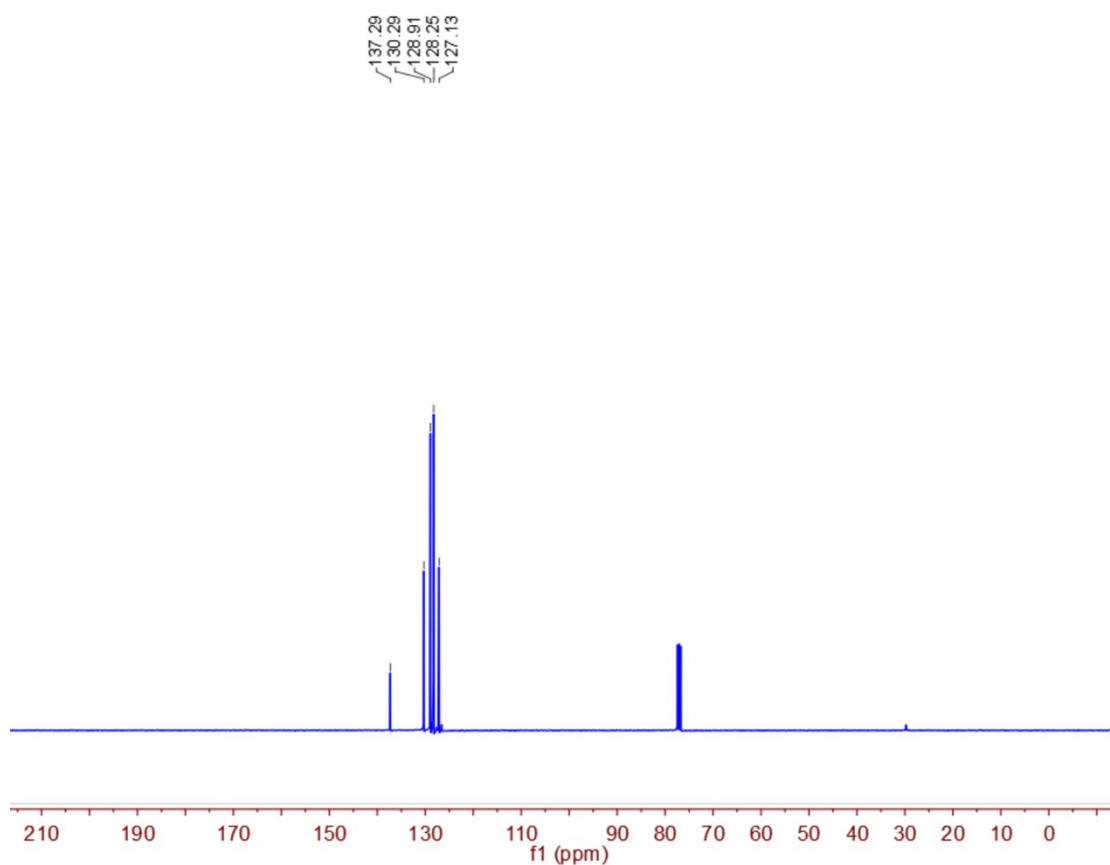

**Figure S11.**  $^{13}\text{C}$  NMR spectra of the adduct **5a**.

**B. (*E*)-3-phenylpentyl-2-enoate *E*→*Z* isomerization**



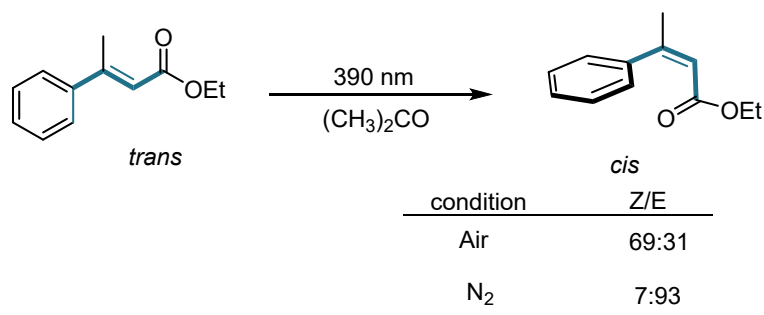

A mixture of (E)-3-phenylpentyl-2-enoate (0.3 mmol), and acetone (1.5 mL) were added to a reaction tube. One tube was open to the air and stirred at room temperature. Another tube was evacuated and backfilled with N<sub>2</sub> for three times. After irradiation of an LED lamp (Kessil PR160L-390 nm) for 8 h, the resulting mixture was diluted with water and then extracted with CH<sub>2</sub>Cl<sub>2</sub>. The obtained organic phase was removed under a vacuum, and the residue was purified by column chromatography using a mixture of petroleum ether and ethyl acetate as eluent to give the desired product. The (E)-3-phenylpentyl-2-enoate provides a 69:31 Z/E in an air atmosphere. While only trace (Z)-3-phenylpentyl-2-enoate was observed under nitrogen atmosphere.

(Z)-3-phenylpentyl-2-enoate<sup>3b</sup>: <sup>1</sup>H NMR (400 MHz, CDCl<sub>3</sub>) δ 7.40 – 7.31 (m, 3H), 7.25 – 7.20 (m, 2H), 5.93 (s, 1H), 4.02 (q, *J* = 7.1 Hz, 2H), 2.20 (s, 3H), 1.10 (t, *J* = 7.1 Hz, 3H). <sup>13</sup>C NMR (101 MHz, CDCl<sub>3</sub>) δ 165.94, 155.34, 140.88, 127.89, 127.72, 126.82, 117.80, 59.76, 27.16, 13.97.

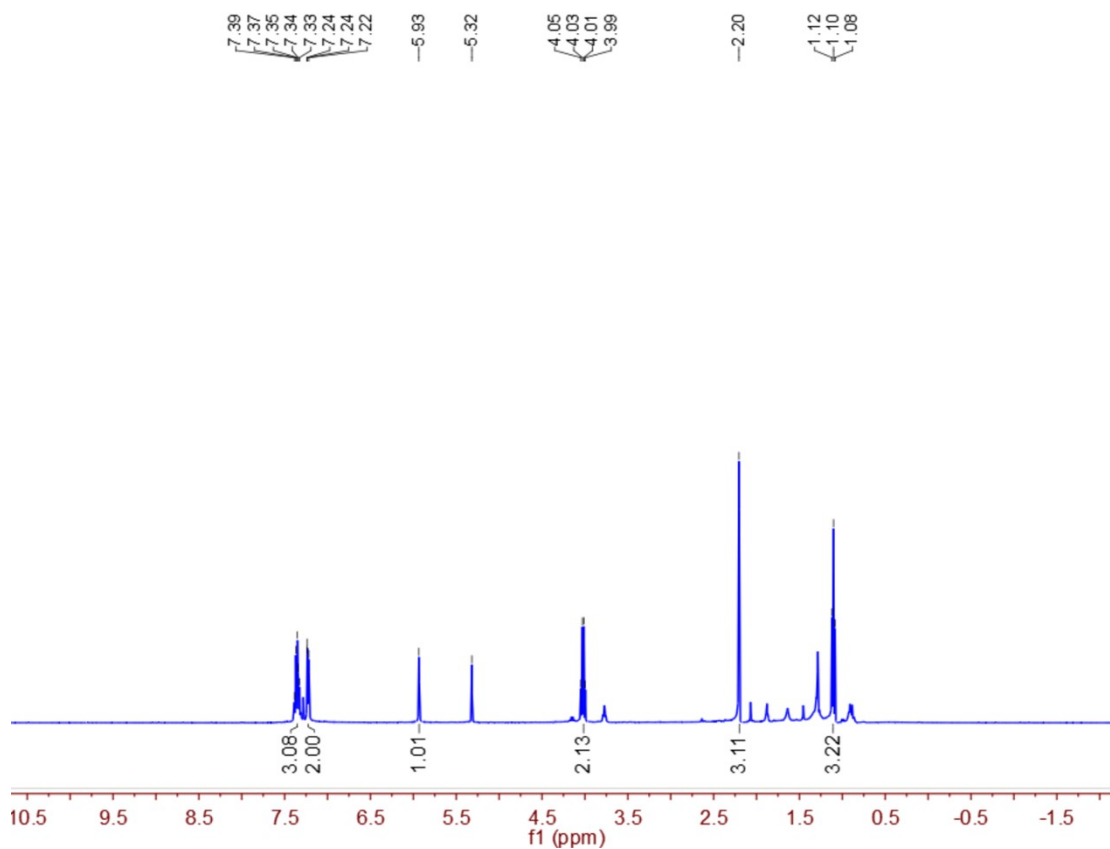

**Figure S12.**  $^1\text{H}$  NMR spectra of (Z)-3-phenylpentyl-2-enoate.

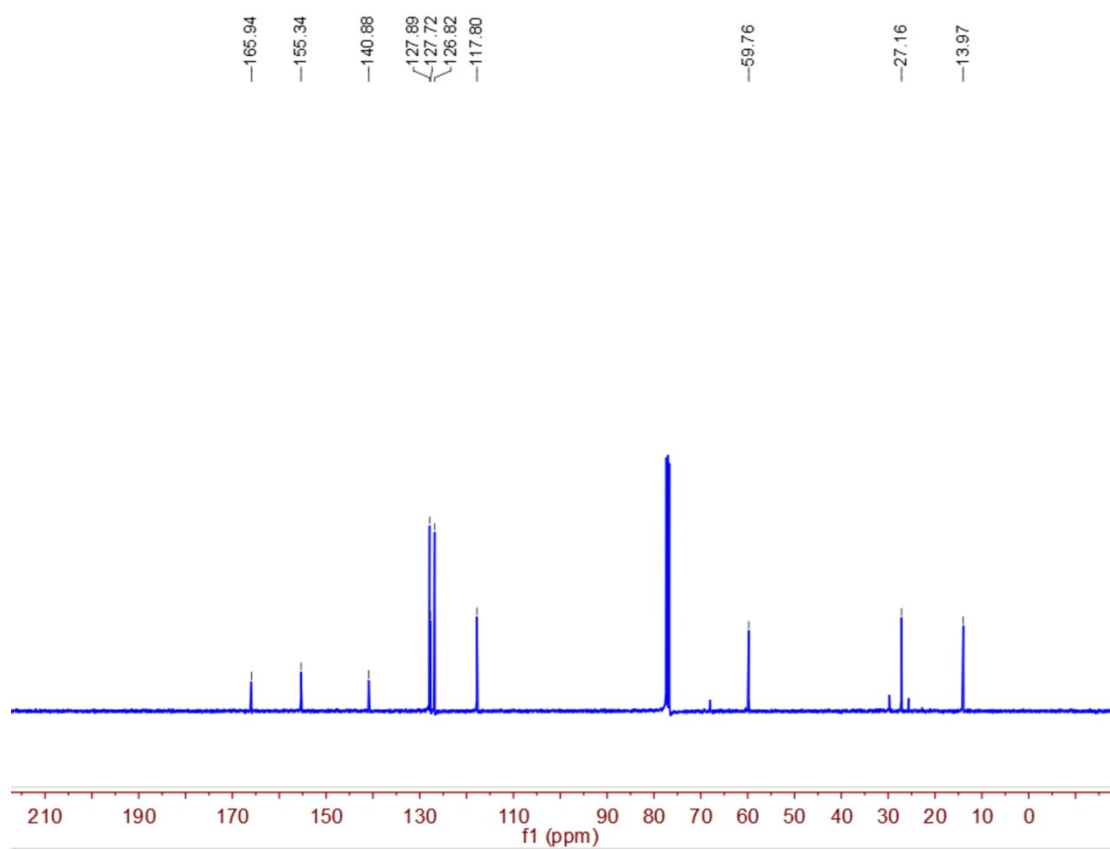

**Figure S13.**  $^{13}\text{C}$  NMR spectra of (Z)-3-phenylpentyl-2-enoate.

#### 4.6 The catalytic investigation of aromatic ketone products

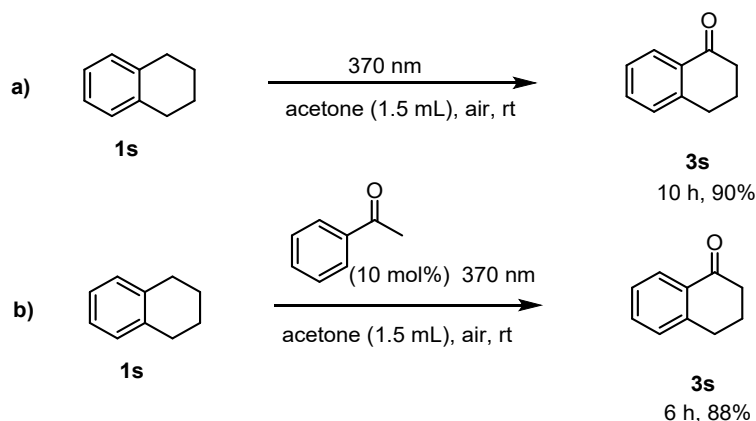

A mixture of tetralin **1s** (0.3 mmol), acetophenone **3a** (10 mol%), and acetone (1.5 mL) were added to a reaction tube. Another reaction tube was added with tetralin **1s** (0.3 mmol) and acetone (1.5 mL). Two reaction tubes were opened to the air and stirred at room temperature under the irradiation of an LED lamp (Kessil PR160L-370 nm Gen 2) until the reaction was completed as monitored by TLC. The results indicate that the addition of acetophenone accelerates the completion of the reaction. After completion of the reaction, the resulting mixture was diluted with water and then extracted with  $\text{CH}_2\text{Cl}_2$ . The obtained organic phase was removed under a vacuum, and the residue was purified by column chromatography using a mixture of petroleum ether and ethyl acetate as eluent to give the desired product.

#### 4.7 Radical trapped experiment using TEMPO as radical scavenger

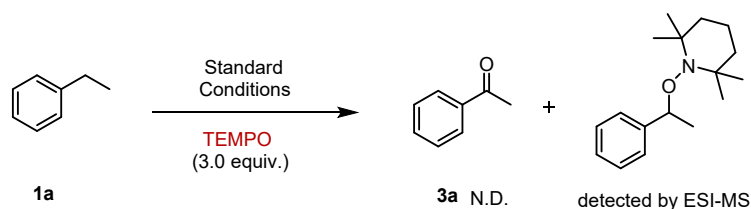

An oven-dried reaction tube equipped with a magnetic stirrer bar was charged with ethylbenzene (**1a**) (0.3 mmol), TEMPO (0.9 mmol) and acetone (1.5 mL). The reaction mixture was open to the air and stirred at room temperature under the irradiation of an LED lamp (Kessil PR160L-370 nm Gen 2) for 24 h. After

completion of the reaction, no **3a** was detected and the adduct **TEMPO-Bn** was detected by ESI-HRMS shown in Figure S14, MS (ESI)  $m/z$   $C_{17}H_{28}NO$   $[M+H]^+$ : found 262.2167.

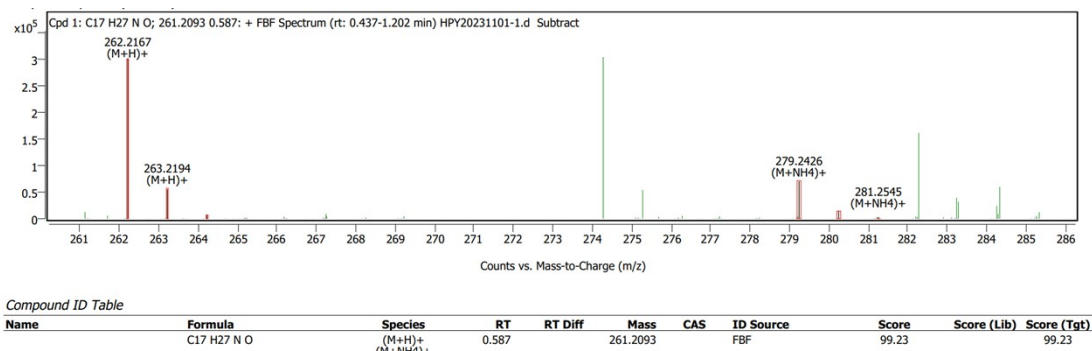

Figure S14. Mass spectra of **TEMPO-Bn**

#### 4.8 Hydrogen donor competition experiment

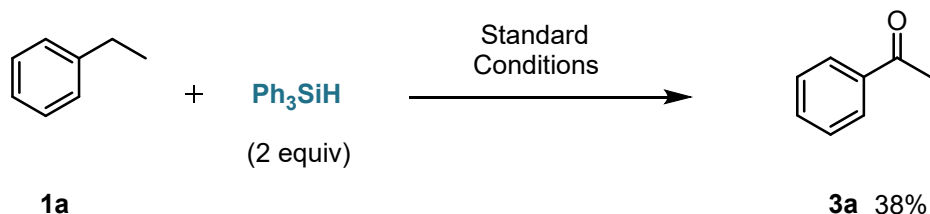

A mixture of ethylbenzene **1a** (0.3 mmol),  $Ph_3SiH$  (0.6 mmol), and acetone (1.5 mL) were added to a reaction tube. The reaction mixture was open to the air and stirred at room temperature under the irradiation of an LED lamp (Kessil PR160L-370 nm Gen 2) for 24 h. After completion of the reaction, the resulting mixture was diluted with water and then extracted with  $CH_2Cl_2$ . The obtained organic phase was removed under a vacuum, and the residue was purified by column chromatography using a mixture of petroleum ether and ethyl acetate as eluent to give the desired product **3a** with 38% yield.

#### 4.9 Determination of the kinetic isotope effect (KIE)

A mixture of toluene (0.3 mmol), toluene- $d_6$  (0.3 mmol), and acetone (1.5 mL)

were added to a reaction tube. The reaction mixture was open to the air and stirred at room temperature under the irradiation of an LED lamp (Kessil PR160L-370 nm Gen 2) for 24 h. After completion of the reaction, benzaldehyde-*h6* and benzaldehyde-*d6* were detected by GC-MS shown in Figure S15. The kinetic isotope effect was estimated by comparing the sum of the isotope fragments of benzaldehyde-*h6* and benzaldehyde-*d6*. Hereby, a KIE of  $\sim 3.1$  could be determined.

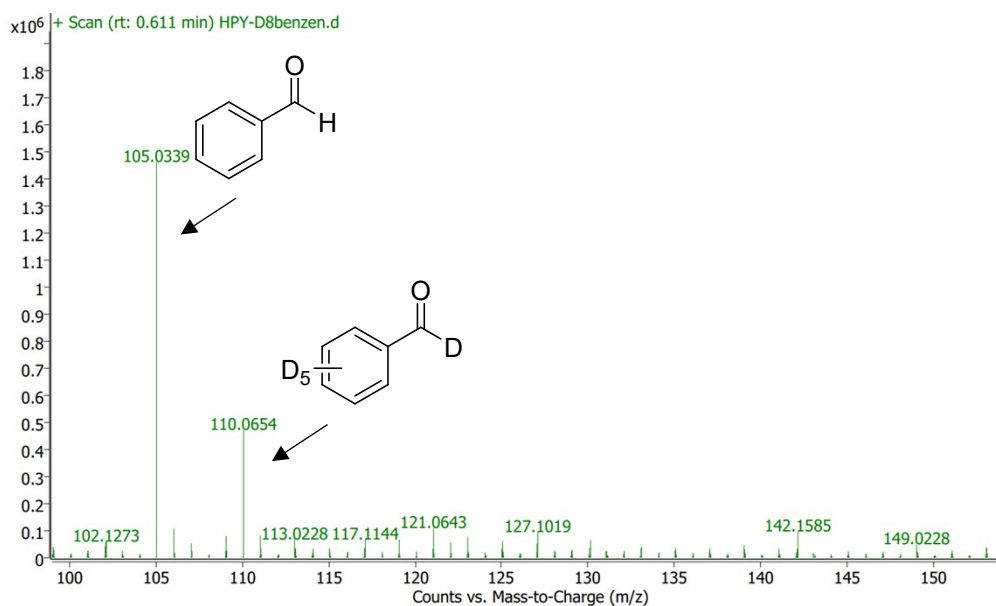

**Figure S15:** Estimation of the kinetic isotope effect by GC-MS

#### 4.10 Obtained intermediates by reaction monitoring with <sup>1</sup>H-NMR

In an oven-dried reaction tube equipped with a magnetic stirrer bar was charged with ethylbenzene (0.2 mmol), and acetone-*d6* (0.6 mL). Then the tube was exposed to an LED lamp (Kessil PR160L-370 nm Gen 2) for 0 h and 0.5 h. After completion of the reaction, <sup>1</sup>H NMR analysis of the solvent (Figure S16)

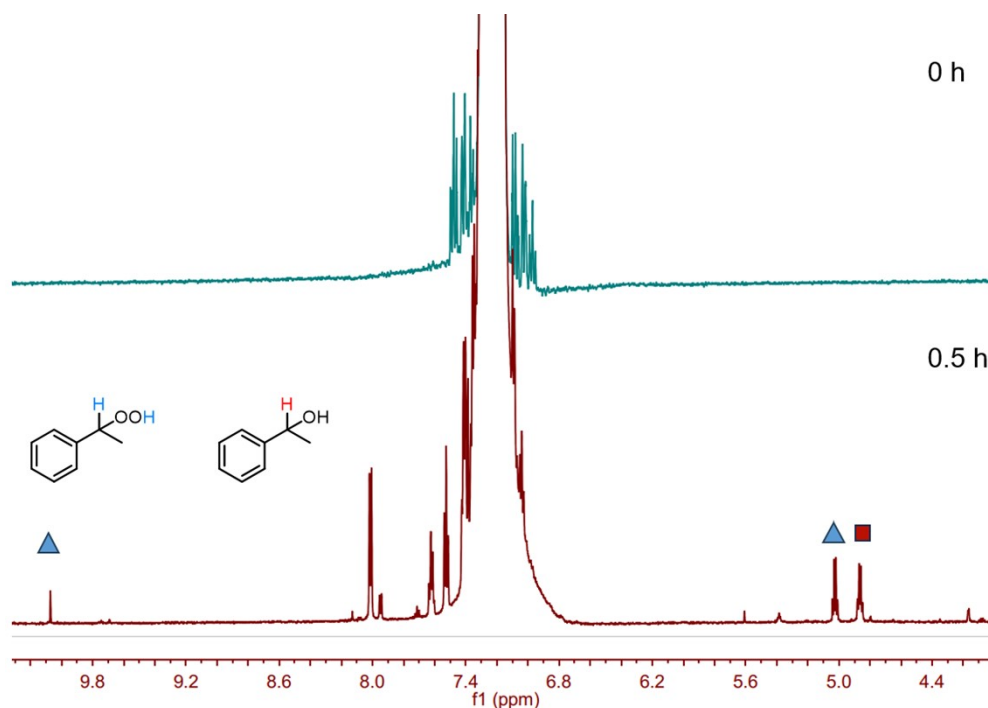

**Figure S16**  $^1\text{H}$  NMR spectra of the reaction (acetone- $d_6$ ).

## 4.11 Determination of the Quantum Yield

### 4.11.1 Determination of the light intensity at 370 nm

The photon flux of the spectrophotometer was determined by standard ferrioxalate actinometry.<sup>4</sup> A 0.15 M solution of ferrioxalate was prepared by dissolving 2.21 g of potassium ferrioxalate hydrate in 30 mL of 0.05 M  $\text{H}_2\text{SO}_4$ . A buffered solution of phenanthroline was prepared by dissolving 50 mg of phenanthroline and 11.25 g of sodium acetate in 50 mL of 0.5 M  $\text{H}_2\text{SO}_4$ . Both solutions were stored in the dark. To determine the photon flux of the spectrophotometer, 2.0 mL of the ferrioxalate solution was placed in a cuvette and irradiated for 90.0 seconds at  $\lambda = 370$  nm. After irradiation, 0.35 mL of the phenanthroline solution was added to the cuvette. The solution was then allowed to rest for 1 h to allow the ferrous ions to completely coordinate to the phenanthroline. The absorbance of the solution was measured at 510 nm. A non-irradiated sample was also prepared and the absorbance at 510 nm measured. Conversion was calculated using eq 1.

$$\text{mol Fe}^{2+} = (V \times \Delta A) / (l \times \epsilon) \quad (\text{S1})$$

Where V is the total volume (0.00235 L) of the solution after addition of phenanthroline,  $\Delta A$  is the difference in absorbance at 510 nm between the irradiated and non-irradiated solutions, l is the path length (1.000 cm), and  $\epsilon$  is the molar absorptivity at 510 nm (11,100 L mol<sup>-1</sup> cm<sup>-1</sup>).<sup>5</sup> The photon flux can be calculated using eq 2.

$$\text{photo flux} = \text{mol Fe}^{2+} / (\Phi \times t \times f) \quad (\text{S2})$$

Where  $\Phi$  is the quantum yield for the ferrioxalate actinometer (1.21 for a 0.15 M solution at  $\lambda = 370$  nm),<sup>5</sup> t is the time (90.0 s), and f is the fraction of light absorbed at  $\lambda = 510$  nm (0.99955, *vide infra*). The photon flux was calculated (average of three experiments) to be  $2.13 \times 10^{-9}$  einstein s<sup>-1</sup>.

|                                                   | Non-irrad | Irrad 1 | Irrad 2 | Irrad 3 |
|---------------------------------------------------|-----------|---------|---------|---------|
| $A_{510\text{nm}}$                                | 0.050     | 1.921   | 1.356   | 1.523   |
| Average $A_{510\text{nm}}$ of irradiation samples | 1.600     |         |         |         |

**Determination of fraction of light absorbed at 370 nm for the ferrioxalate solution:**

The absorbance of the above ferrioxalate solution at 370 nm was measured to be 3.35. The fraction of light absorbed (f) by this solution was calculated using eq 3, where A is the measured absorbance at 370 nm.

$$f = 1 - 10^{-A} \quad (\text{S3})$$

$$f = 1 - 10^{-3.35} = 0.99955$$

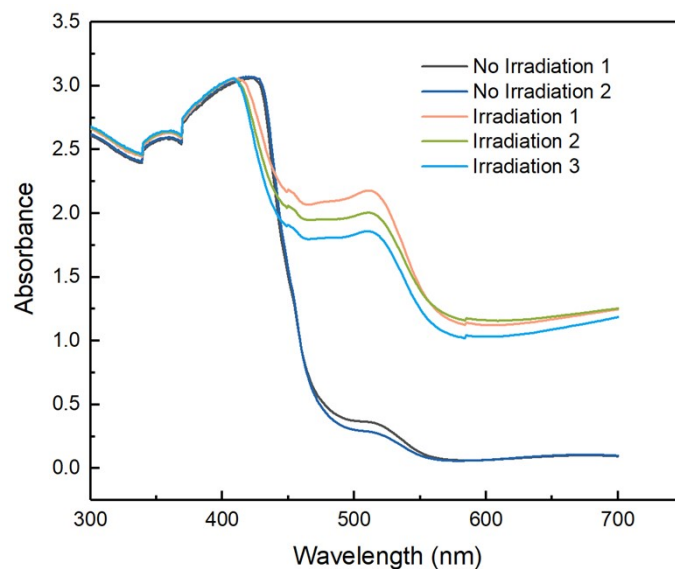

**Figure S17.** Absorption spectra of three irradiation experiments and non-irradiation experiment

#### 4.11.2 Determination of the reaction quantum yield at 370 nm

A mixture of ethylbenzene (0.3 mmol) and acetone (1.5 mL) were added to a reaction tube. The reaction mixture was open to the air and stirred at room temperature under the irradiation of an LED lamp (Kessil PR160L-370 nm Gen 2) for 10800s. After irradiation, the yield of the product **3a** was determined by  $^1\text{H}$  NMR based on a trifluoromethoxybenzene standard and the final yield was 6.0% ( $1.80 \times 10^{-5}$  mol).

$$\begin{aligned}
 \text{Quantum Yield } (\Phi) &= \text{moles of product formed} / (\text{flux} \times f \times t) && \text{(S4)} \\
 &= 1.80 \times 10^{-5} / (2.13 \times 10^{-9} \times 0.999 \times 10800) \\
 &= 0.78
 \end{aligned}$$

#### 4.12 On/off experiments of **3a**

Four parallel reactions were performed ethylbenzene (0.3 mmol) according to the General Procedure A. The yield of **3a** was recorded at the given times. The white area indicates the light irradiation, while the grey area indicates time in the dark.



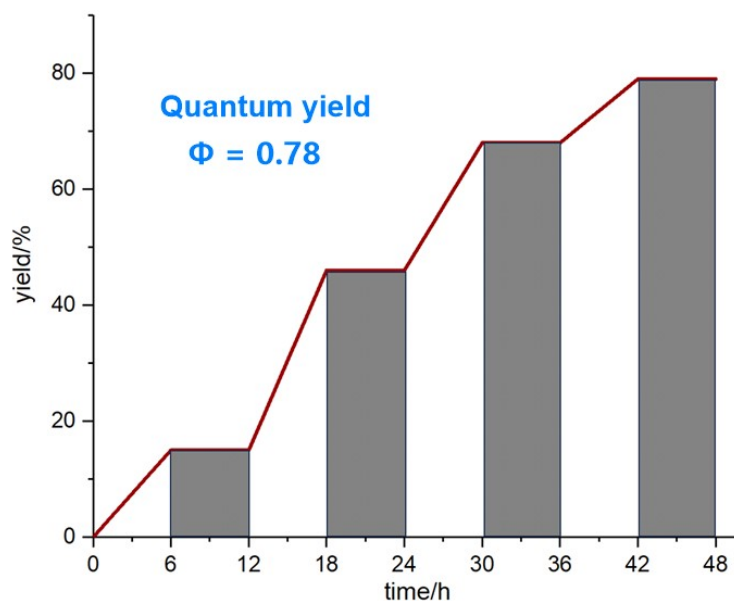

**Figure S18.** On/off experiments of **3a**.

## 5. Characterization Data for the Products

### acetophenone (**3a**)<sup>6</sup>

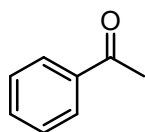

The product was purified by column chromatography on silica gel (eluent: 100:1 petroleum ether: ethyl acetate) as a colorless liquid (28 mg, 79%). <sup>1</sup>H NMR (400 MHz, CDCl<sub>3</sub>)  $\delta$  8.00 – 7.95 (m, 2H), 7.58 (t,  $J = 7.4$  Hz, 1H), 7.48 (t,  $J = 7.6$  Hz, 2H), 2.62 (s, 3H). <sup>13</sup>C NMR (101 MHz, CDCl<sub>3</sub>)  $\delta$  198.06, 137.18, 133.06, 128.55, 128.28, 26.55.

### 1-(4-methoxyphenyl)ethan-1-one (**3b**)<sup>7</sup>

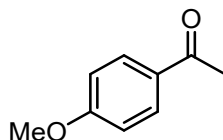

The product was purified by column chromatography on silica gel (eluent: 100:1 petroleum ether: ethyl acetate) as a white solid (34 mg, 77%). <sup>1</sup>H NMR (400 MHz,

CDCl<sub>3</sub>)  $\delta$  7.96 (d,  $J$  = 8.8 Hz, 2H), 6.96 (d,  $J$  = 8.8 Hz, 2H), 3.89 (s, 3H), 2.58 (s, 3H).  
<sup>13</sup>C NMR (101 MHz, CDCl<sub>3</sub>)  $\delta$  196.77, 163.48, 130.59, 130.37, 113.68, 55.47, 26.35.

### 1-(p-tolyl)ethan-1-one (3c)<sup>7</sup>

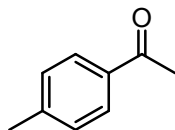

The product was purified by column chromatography on silica gel (eluent: 10:1 petroleum ether: ethyl acetate) as a colorless liquid (29 mg, 73%). <sup>1</sup>H NMR (400 MHz, CDCl<sub>3</sub>)  $\delta$  7.88 (d,  $J$  = 8.1 Hz, 2H), 7.28 (d,  $J$  = 7.9 Hz, 2H), 2.60 (s, 3H), 2.43 (s, 3H). <sup>13</sup>C NMR (101 MHz, CDCl<sub>3</sub>)  $\delta$  197.83, 143.86, 134.73, 129.24, 128.44, 26.53, 21.63.

### 1-(4-bromophenyl)ethan-1-one (3d)<sup>7</sup>

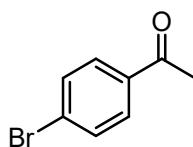

The product was purified by column chromatography on silica gel (eluent: 40:1 petroleum ether: ethyl acetate) as a white solid (52 mg, 87%). <sup>1</sup>H NMR (400 MHz, CDCl<sub>3</sub>)  $\delta$  7.83 (d,  $J$  = 7.3 Hz, 2H), 7.61 (d,  $J$  = 7.4 Hz, 2H), 2.60 (s, 3H). <sup>13</sup>C NMR (101 MHz, CDCl<sub>3</sub>)  $\delta$  197.01, 135.83, 131.89, 129.84, 128.30, 26.56.

### 4-acetylbenzonitrile (3e)<sup>7</sup>

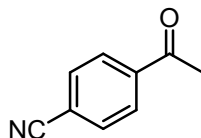

The product was purified by column chromatography on silica gel (eluent: 40:1 petroleum ether: ethyl acetate) as a yellow solid (29 mg, 67%). <sup>1</sup>H NMR (400 MHz, CDCl<sub>3</sub>)  $\delta$  8.07 (d,  $J$  = 8.0 Hz, 2H), 7.80 (d,  $J$  = 8.0 Hz, 2H), 2.67 (s, 3H). <sup>13</sup>C NMR (101 MHz, CDCl<sub>3</sub>)  $\delta$  196.53, 139.92, 132.53, 128.70, 117.92, 116.44, 26.78.

### 1-(4-nitrophenyl)ethan-1-one (3f) <sup>7</sup>

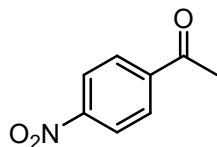

The product was purified by column chromatography on silica gel (eluent: 20:1 petroleum ether: ethyl acetate) as a white solid (9 mg, 18%). <sup>1</sup>H NMR (400 MHz, CDCl<sub>3</sub>) δ 8.33 (d, *J* = 8.8 Hz, 2H), 8.13 (d, *J* = 8.7 Hz, 2H), 2.70 (s, 3H). <sup>13</sup>C NMR (101 MHz, CDCl<sub>3</sub>) δ 196.30, 150.37, 141.38, 129.31, 123.86, 26.99 (s).

### 1-(thiophen-2-yl)ethan-1-one (3g) <sup>8</sup>

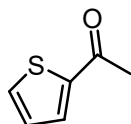

The product was purified by column chromatography on silica gel (eluent: 100:1 petroleum ether: ethyl acetate) as a colorless oil (31 mg, 82%). <sup>1</sup>H NMR (400 MHz, CDCl<sub>3</sub>) δ 7.71 – 7.65 (m, 1H), 7.63 – 7.58 (m, 1H), 7.13 – 7.07 (m, 1H), 2.56 – 2.52 (m, 3H). <sup>13</sup>C NMR (101 MHz, CDCl<sub>3</sub>) δ 190.61, 144.54, 133.71, 132.46, 128.10, 26.84.

### 1-(pyridin-3-yl)ethan-1-one (3h) <sup>7</sup>

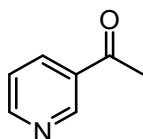

The product was purified by column chromatography on silica gel (eluent: 15:1 petroleum ether: ethyl acetate) as a yellow oil (20 mg, 57%). <sup>1</sup>H NMR (400 MHz, CDCl<sub>3</sub>) δ 9.18 – 9.08 (m, 1H), 8.79 – 8.67 (m, 1H), 8.25 – 8.15 (m, 1H), 7.43 – 7.33 (m, 1H), 2.62 (s, 3H). <sup>13</sup>C NMR (101 MHz, CDCl<sub>3</sub>) δ 196.72, 153.47, 149.87, 135.49, 132.25, 123.65, 26.72.

### 1-(naphthalen-2-yl)ethan-1-one (3i) <sup>7</sup>

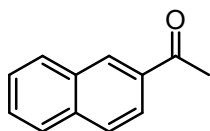

The product was purified by column chromatography on silica gel (eluent: 50:1 petroleum ether: ethyl acetate) as a white solid (36 mg, 71%). <sup>1</sup>H NMR (400 MHz, CDCl<sub>3</sub>) δ 8.48 (s, 1H), 8.06 (dd, *J* = 8.6, 1.7 Hz, 1H), 7.98 (d, *J* = 8.0 Hz, 1H), 7.93 – 7.88 (m, 2H), 7.65 – 7.55 (m, 2H), 2.75 (s, 3H). <sup>13</sup>C NMR (101 MHz, CDCl<sub>3</sub>) δ 198.11, 135.59, 134.49, 132.52, 130.21, 129.56, 128.49, 128.43, 127.80, 126.79, 123.90, 26.72.

### 1-([1,1'-biphenyl]-4-yl)ethan-1-one (3j) <sup>7</sup>

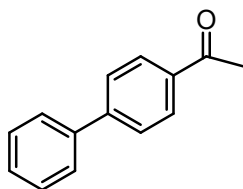

The product was purified by column chromatography on silica gel (eluent: 30:1 petroleum ether: ethyl acetate) as a pale-yellow oil (32 mg, 54%). <sup>1</sup>H NMR (400 MHz, CDCl<sub>3</sub>) δ 8.06 (d, *J* = 7.9 Hz, 2H), 7.72 (d, *J* = 7.9 Hz, 2H), 7.66 (d, *J* = 7.4 Hz, 2H), 7.50 (t, *J* = 7.3 Hz, 2H), 7.43 (t, *J* = 7.1 Hz, 1H), 2.67 (s, 3H). <sup>13</sup>C NMR (101 MHz, CDCl<sub>3</sub>) δ 197.78, 145.79, 139.88, 135.86, 128.97, 128.93, 128.25, 127.28, 127.24, 26.69.

### (4-acetylphenyl)boronic acid (3k) <sup>9</sup>

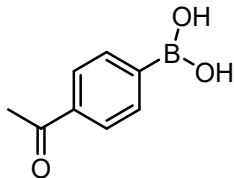

The product was purified by column chromatography on silica gel (eluent: 4:1 petroleum ether: ethyl acetate) as a yellow solid (30 mg, 62%). <sup>1</sup>H NMR (400 MHz, DMSO) δ 8.25 (s, 2H), 7.91 (s, 4H), 2.59 (s, 3H). <sup>13</sup>C NMR (101 MHz, DMSO) δ 198.71, 138.29, 134.70, 127.41, 27.28.

### Benzophenone (3l) <sup>7</sup>

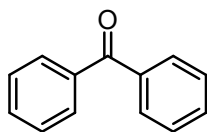

The product was purified by column chromatography on silica gel (eluent: 50:1 petroleum ether: ethyl acetate) as a pale-yellow oil (50 mg, 91%). <sup>1</sup>H NMR (400 MHz, CDCl<sub>3</sub>) δ 7.89 – 7.81 (m, 4H), 7.64 – 7.58 (m, 2H), 7.51 (t, *J* = 7.6 Hz, 4H). <sup>13</sup>C NMR (101 MHz, CDCl<sub>3</sub>) δ 196.70, 137.64, 132.39, 130.04, 128.27.

### 1-phenylbutan-1-one (3m) <sup>7</sup>

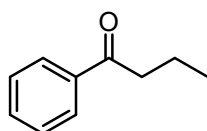

The product was purified by column chromatography on silica gel (eluent: 15:1 petroleum ether: ethyl acetate) as a colorless oil (28 mg, 63%). <sup>1</sup>H NMR (400 MHz, CDCl<sub>3</sub>) δ 7.98 (d, *J* = 7.3 Hz, 2H), 7.57 (t, *J* = 7.3 Hz, 1H), 7.48 (t, *J* = 7.6 Hz, 2H), 2.97 (t, *J* = 7.3 Hz, 2H), 1.85 – 1.73 (m, 2H), 1.03 (t, *J* = 7.4 Hz, 3H). <sup>13</sup>C NMR (101 MHz, CDCl<sub>3</sub>) δ 200.42, 137.13, 132.85, 128.54, 128.04, 40.53, 17.79, 13.90.

### 4-oxo-4-phenylbutanenitrile (3n) <sup>10</sup>

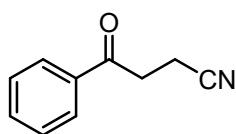

The product was purified by column chromatography on silica gel (eluent: 20:1 petroleum ether: ethyl acetate) as a colorless liquid (29mg, 60%). <sup>1</sup>H NMR (400 MHz, CDCl<sub>3</sub>) δ 7.98 (d, *J* = 6.8 Hz, 2H), 7.63 (d, *J* = 6.5 Hz, 1H), 7.53 (d, *J* = 6.7 Hz, 2H), 3.41 (s, 2H), 2.80 (s, 2H). <sup>13</sup>C NMR (101 MHz, CDCl<sub>3</sub>) δ 195.35, 135.59, 133.92, 128.89, 128.03, 119.26, 34.28, 11.82.

### 1,3-diphenylpropan-1-one (3o) <sup>7</sup>

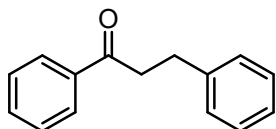

The product was purified by column chromatography on silica gel (eluent: 50:1 petroleum ether: ethyl acetate) as a white solid (55 mg, 77%).  $^1\text{H}$  NMR (400 MHz,  $\text{CDCl}_3$ )  $\delta$  8.05 – 7.96 (m, 2H), 7.61 – 7.56 (m, 1H), 7.52 – 7.45 (m, 2H), 7.37 – 7.28 (m, 4H), 7.25 (t,  $J = 7.0$  Hz, 1H), 3.34 (t,  $J = 7.2$  Hz, 2H), 3.12 (t,  $J = 7.2$  Hz, 2H).  $^{13}\text{C}$  NMR (101 MHz,  $\text{CDCl}_3$ )  $\delta$  199.18, 141.32, 136.96, 133.03, 128.61, 128.54, 128.44, 128.06, 126.15, 40.43, 30.19.

#### 4-bromo-1-phenylbutan-1-one (3p) <sup>11</sup>

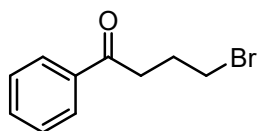

The product was purified by column chromatography on silica gel (eluent: 40:1 petroleum ether: ethyl acetate) as a yellow liquid (58 mg, 85%).  $^1\text{H}$  NMR (400 MHz,  $\text{CDCl}_3$ )  $\delta$  8.03 – 7.97 (m, 2H), 7.59 (dt,  $J = 8.5, 1.2$  Hz, 1H), 7.49 (t,  $J = 7.6$  Hz, 2H), 3.57 (t,  $J = 6.3$  Hz, 2H), 3.21 (t,  $J = 6.9$  Hz, 2H), 2.34 (p,  $J = 6.7$  Hz, 2H).  $^{13}\text{C}$  NMR (101 MHz,  $\text{CDCl}_3$ )  $\delta$  198.78, 136.75, 133.24, 128.66, 128.02, 36.58, 33.64, 26.89.

#### 1-phenylhexan-1-one (3q) <sup>12</sup>

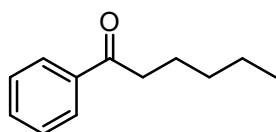

The product was purified by column chromatography on silica gel (eluent: 100:1 petroleum ether: ethyl acetate) as a pale-yellow oil (30mg, 58%).  $^1\text{H}$  NMR (400 MHz,  $\text{CDCl}_3$ )  $\delta$  8.01 – 7.95 (m, 2H), 7.58 (t,  $J = 7.3$  Hz, 1H), 7.48 (t,  $J = 7.6$  Hz, 2H), 2.98 (t,  $J = 7.4$  Hz, 2H), 1.83 – 1.69 (m, 2H), 1.43 – 1.34 (m, 4H), 0.96 – 0.91 (m, 3H).  $^{13}\text{C}$  NMR (101 MHz,  $\text{CDCl}_3$ )  $\delta$  200.60, 137.12, 132.84, 128.54, 128.05, 38.60, 31.57, 24.09, 22.54, 13.97.

### 1-phenylheptan-1-one (3r) <sup>12</sup>

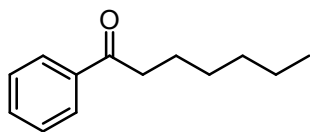

The product was purified by column chromatography on silica gel (eluent: 100:1 petroleum ether: ethyl acetate) as a pale-yellow oil (31 mg, 54%). <sup>1</sup>H NMR (400 MHz, CDCl<sub>3</sub>) δ 8.02 – 7.96 (m, 2H), 7.61 – 7.55 (m, 1H), 7.48 (t, *J* = 7.5 Hz, 2H), 2.99 (t, *J* = 7.6 Hz, 2H), 1.76 (m, 2H), 1.45 – 1.29 (m, 6H), 0.92 (t, *J* = 6.9 Hz, 3H). <sup>13</sup>C NMR (101 MHz, CDCl<sub>3</sub>) δ 200.64, 137.10, 132.86, 128.55, 128.06, 38.66, 31.69, 29.07, 24.36, 22.56, 14.07.

### 3,4-dihydronaphthalen-1(2H)-one (3s) <sup>7</sup>

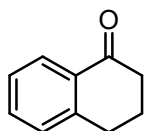

The product was purified by column chromatography on silica gel (eluent: 50:1 petroleum ether: ethyl acetate) as a pale-yellow oil (39 mg, 90%). <sup>1</sup>H NMR (400 MHz, CDCl<sub>3</sub>) δ 8.06 (d, *J* = 7.8 Hz, 1H), 7.49 (td, *J* = 7.5, 1.4 Hz, 1H), 7.33 (t, *J* = 7.5 Hz, 1H), 7.27 (d, *J* = 6.0 Hz, 1H), 3.00 (t, *J* = 6.1 Hz, 2H), 2.69 (t, *J* = 6.4 Hz, 2H), 2.19 – 2.10 (m, 2H). <sup>13</sup>C NMR (101 MHz, CDCl<sub>3</sub>) δ 198.34, 144.47, 133.37, 132.65, 128.75, 127.19, 126.63, 39.18, 29.72, 23.30.

### isochroman-1-one (3t) <sup>7</sup>

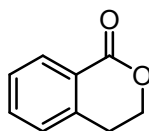

The product was purified by column chromatography on silica gel (eluent: 15:1 petroleum ether: ethyl acetate) as a white solid (34 mg, 76%). <sup>1</sup>H NMR (400 MHz, CDCl<sub>3</sub>) δ 8.10 (d, *J* = 7.8 Hz, 1H), 7.55 (td, *J* = 7.5, 1.4 Hz, 1H), 7.41 (t, *J* = 8.2 Hz, 1H), 7.28 (d, *J* = 7.6 Hz, 1H), 4.57 – 4.52 (m, 2H), 3.08 (t, *J* = 6.0 Hz, 2H). <sup>13</sup>C NMR

(101 MHz, CDCl<sub>3</sub>)  $\delta$  165.06, 139.59, 133.65, 130.30, 127.63, 127.26, 125.31, 67.31, 27.81.

**3,4-dihydroisoquinolin-1(2H)-one (3u)** <sup>13</sup>

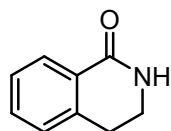

The product was purified by column chromatography on silica gel (eluent: 15:1 petroleum ether: ethyl acetate) as a yellow oil (36 mg, 82%). <sup>1</sup>H NMR (400 MHz, CDCl<sub>3</sub>)  $\delta$  8.34 (s, 1H), 7.35 (td,  $J$  = 7.2, 1.9 Hz, 1H), 7.32 – 7.24 (m, 2H), 7.15 (d,  $J$  = 7.3 Hz, 1H), 3.81 – 3.74 (m, 2H), 2.75 (t, 2H). <sup>13</sup>C NMR (101 MHz, CDCl<sub>3</sub>)  $\delta$  160.28, 136.31, 131.03, 128.50, 127.39, 127.18, 127.06, 47.36, 25.02.

**2,3-dihydro-1H-inden-1-one (3v)** <sup>7</sup>

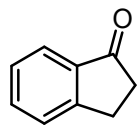

The product was purified by column chromatography on silica gel (eluent: 50:1 petroleum ether: ethyl acetate) as a light yellow oil (32 mg, 82%). <sup>1</sup>H NMR (400 MHz, CDCl<sub>3</sub>)  $\delta$  7.72 (d,  $J$  = 7.7 Hz, 1H), 7.45 (d,  $J$  = 7.7 Hz, 1H), 7.34 (t,  $J$  = 7.4 Hz, 1H), 3.11 (t, 2H), 2.68 – 2.61 (m, 2H). <sup>13</sup>C NMR (101 MHz, CDCl<sub>3</sub>)  $\delta$  206.91, 155.11, 137.04, 134.54, 127.22, 126.68, 123.61, 36.18, 25.77.

**anthracen-9(10H)-one (3w)** <sup>14</sup>

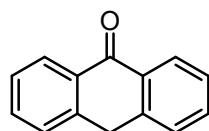

The product was purified by column chromatography on silica gel (eluent: 50:1 petroleum ether: ethyl acetate) as a yellow solid (40 mg, 69%). <sup>1</sup>H NMR (400 MHz,



CDCl<sub>3</sub>)  $\delta$  8.43 – 8.37 (m, 2H), 7.66 – 7.60 (m, 2H), 7.51 (d,  $J$  = 7.5 Hz, 4H), 4.40 (s, 2H). <sup>13</sup>C NMR (101 MHz, CDCl<sub>3</sub>)  $\delta$  184.28, 140.45, 132.74, 132.07, 128.46, 127.62, 127.03, 32.39.

**anthracene-9,10-dione (3x)** <sup>10</sup>

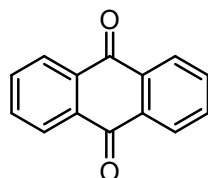

The product was purified by column chromatography on silica gel (eluent: 50:1 petroleum ether: ethyl acetate) as a yellow solid (39 mg, 63%). <sup>1</sup>H NMR (400 MHz, CDCl<sub>3</sub>)  $\delta$  8.38 – 8.30 (m, 4H), 7.87 – 7.79 (m, 4H). <sup>13</sup>C NMR (101 MHz, CDCl<sub>3</sub>)  $\delta$  183.14, 134.10, 133.55, 127.23.

**3,3-difluoro-4-(4-oxochroman-3-yl)-1-(3-(trifluoromethyl)phenyl)pyrrolidin-2-one (3y)** <sup>7</sup>

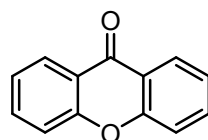

The product was purified by column chromatography on silica gel (eluent: 30:1 petroleum ether: ethyl acetate) as a white solid (52 mg, 90%). <sup>1</sup>H NMR (400 MHz, CDCl<sub>3</sub>)  $\delta$  8.37 (d,  $J$  = 7.9 Hz, 1H), 7.76 (t,  $J$  = 7.7 Hz, 1H), 7.53 (d,  $J$  = 8.4 Hz, 1H), 7.41 (t,  $J$  = 7.5 Hz, 1H). <sup>13</sup>C NMR (101 MHz, CDCl<sub>3</sub>)  $\delta$  177.26, 156.19, 134.84, 126.75, 123.93, 121.86, 118.00.

**9H-fluoren-9-one (3z)** <sup>15</sup>

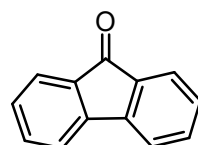

The product was purified by column chromatography on silica gel (eluent: 50:1

petroleum ether: ethyl acetate) as a yellow solid (44 mg, 82%).  $^1\text{H}$  NMR (400 MHz,  $\text{CDCl}_3$ )  $\delta$  7.68 (d,  $J = 7.3$  Hz, 2H), 7.56 – 7.48 (m, 4H), 7.31 (td,  $J = 7.3, 1.3$  Hz, 1H).  $^{13}\text{C}$  NMR (101 MHz,  $\text{CDCl}_3$ )  $\delta$  193.84, 144.44, 134.64, 134.19, 129.06, 124.30, 120.28.

**acenaphthylen-1(2H)-one (3aa)** <sup>7</sup>

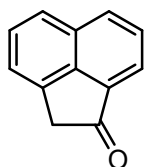

The product was purified by column chromatography on silica gel (eluent: 40:1 petroleum ether: ethyl acetate) as a white solid (25 mg, 49%).  $^1\text{H}$  NMR (400 MHz,  $\text{CDCl}_3$ )  $\delta$  8.12 (d,  $J = 8.1$  Hz, 1H), 7.99 (d,  $J = 7.0$  Hz, 1H), 7.85 (d,  $J = 8.4$  Hz, 1H), 7.76 – 7.71 (m, 1H), 7.67 – 7.59 (m, 1H), 7.50 (d,  $J = 6.8$  Hz, 1H), 3.85 (s, 2H).  $^{13}\text{C}$  NMR (101 MHz,  $\text{CDCl}_3$ )  $\delta$  202.84, 142.95, 135.03, 134.73, 131.44, 130.98, 128.36, 127.98, 123.94, 121.42, 121.01, 42.00.

**1-(4''-ethyl-5'-(4-ethylphenyl)-[1,1':3',1''-terphenyl]-4-yl)ethan-1-one (3ab)**

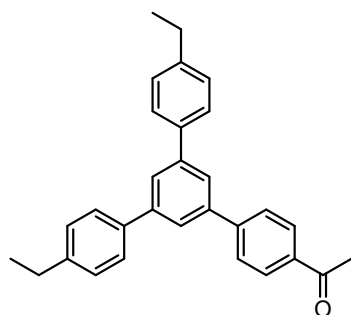

The product was purified by column chromatography on silica gel (eluent: 30:1 petroleum ether: ethyl acetate) as a white solid (69 mg, 57%).  $^1\text{H}$  NMR (400 MHz,  $\text{CDCl}_3$ )  $\delta$  8.10 (d,  $J = 7.7$  Hz, 2H), 7.81 (m, 5H), 7.65 (d,  $J = 7.5$  Hz, 4H), 7.35 (d,  $J = 7.4$  Hz, 4H), 2.75 (q,  $J = 14.3$  Hz, 4H), 2.69 (s, 3H), 1.33 (t,  $J = 10.0$  Hz, 6H).  $^{13}\text{C}$  NMR (101 MHz,  $\text{CDCl}_3$ )  $\delta$  197.81, 145.89, 143.92, 142.51, 138.29, 128.98, 128.44, 127.45, 127.27, 125.83, 124.81, 28.58, 26.73, 15.63. HRMS (ESI)  $m/z$ :  $[\text{M}+\text{H}]^+$  Calcd for  $\text{C}_{30}\text{H}_{29}\text{O}$  405.2218; Found 405.2215.

### 1-(4-(1H-benzo[d]imidazol-1-yl)phenyl)ethan-1-one (3ac) <sup>16</sup>

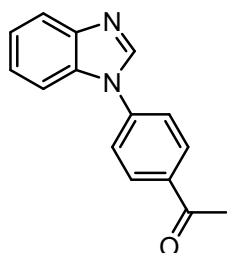

The product was purified by column chromatography on silica gel (eluent: 5:1 petroleum ether: ethyl acetate) as a white solid (30 mg, 43%). <sup>1</sup>H NMR (400 MHz, CDCl<sub>3</sub>) δ 8.39 – 8.13 (m, 3H), 7.94 (s, 1H), 7.69 (d, *J* = 6.7 Hz, 3H), 7.41 (s, 2H), 2.71 (s, 3H). <sup>13</sup>C NMR (101 MHz, CDCl<sub>3</sub>) δ 196.63, 140.17, 136.30, 130.43, 124.41, 123.52, 120.75, 110.69, 99.99, 26.73.

### 2-(2-oxo-2-phenylethyl)isoindoline-1,3-dione (3ad) <sup>10</sup>

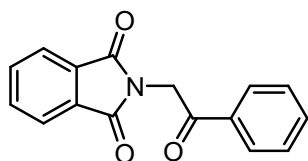

The product was purified by column chromatography on silica gel (eluent: 10:1 petroleum ether: ethyl acetate) as a white solid (23 mg, 29%). <sup>1</sup>H NMR (400 MHz, CDCl<sub>3</sub>) δ 8.04 (d, *J* = 7.5 Hz, 2H), 7.92 (d, *J* = 2.8 Hz, 2H), 7.78 (s, 2H), 7.66 (t, *J* = 7.0 Hz, 1H), 7.54 (t, *J* = 7.4 Hz, 2H), 5.16 (s, 2H). <sup>13</sup>C NMR (101 MHz, CDCl<sub>3</sub>) δ 190.97, 167.92, 134.41, 134.15, 134.07, 132.24, 128.92, 128.16, 123.58, 44.22.

### 4-acetylphenyl (1r,3r,5r,7r)-adamantane-2-carboxylate (3ae)

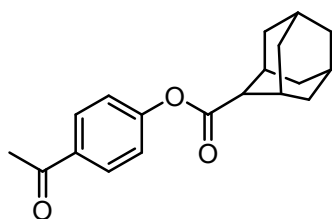

The product was purified by column chromatography on silica gel (eluent: 25:1

petroleum ether: ethyl acetate) as a white solid (63 mg, 71%). <sup>1</sup>H NMR (400 MHz, CDCl<sub>3</sub>) δ 8.01 (d, *J* = 8.5 Hz, 2H), 7.17 (d, *J* = 8.5 Hz, 2H), 2.62 (s, 3H), 2.10 (d, *J* = 14.2 Hz, 9H), 1.80 (s, 6H). <sup>13</sup>C NMR (101 MHz, CDCl<sub>3</sub>) δ 196.96, 175.66, 154.98, 134.50, 129.89, 121.80, 41.17, 38.71, 36.40, 27.86, 26.64. HRMS (ESI) *m/z*: [M+H]<sup>+</sup> Calcd for C<sub>19</sub>H<sub>23</sub>O<sub>3</sub> 299.1645; Found 299.1644.

### 1-tosyl-2,3-dihydroquinolin-4(1H)-one (3af) <sup>17</sup>

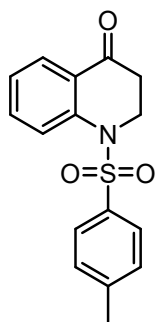

The product was purified by column chromatography on silica gel (eluent: 10:1 petroleum ether: ethyl acetate) as a white solid (74 mg, 82%). <sup>1</sup>H NMR (400 MHz, CDCl<sub>3</sub>) δ 7.97 (d, 1H), 7.89 (d, *J* = 8.3 Hz, 1H), 7.63 – 7.55 (m, 3H), 7.31 – 7.28 (m, 1H), 7.28 – 7.23 (m, 2H), 4.25 (t, *J* = 6.4 Hz, 2H), 2.44 – 2.38 (m, 5H). <sup>13</sup>C NMR (101 MHz, CDCl<sub>3</sub>) δ 192.73, 144.59, 142.37, 136.83, 134.73, 130.13, 127.76, 126.88, 125.71, 125.66, 124.61, 46.24, 36.53, 21.61.

### benzaldehyde (3ag) <sup>1</sup>

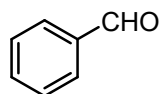

The product was purified by column chromatography on silica gel (eluent: 100:1 petroleum ether: ethyl acetate) as a colorless liquid (19 mg, 62%). <sup>1</sup>H NMR (400 MHz, CDCl<sub>3</sub>) δ 10.05 (s, 1H), 7.91 (d, *J* = 7.7 Hz, 2H), 7.66 (t, *J* = 7.4 Hz, 1H), 7.56 (t, *J* = 7.5 Hz, 2H). <sup>13</sup>C NMR (101 MHz, CDCl<sub>3</sub>) δ 192.42, 136.40, 134.48, 129.76, 129.01.

### 2-methylbenzaldehyde (3ah) <sup>18</sup>

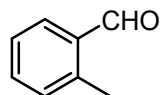

The product was purified by column chromatography on silica gel (eluent: 100:1 petroleum ether: ethyl acetate) as a yellow oil (21 mg, 60%). <sup>1</sup>H NMR (400 MHz, Chloroform-*d*) δ 10.30 (s, 1H), 7.82 (dd, *J* = 7.6, 1.6 Hz, 1H), 7.53 – 7.47 (m, 1H), 7.40 (d, *J* = 7.5 Hz, 1H), 7.29 (d, *J* = 7.5 Hz, 1H), 2.70 (s, 3H). <sup>13</sup>C NMR (101 MHz, Chloroform-*d*) δ 192.88, 140.66, 134.16, 133.68, 132.07, 131.79, 126.35, 19.61.

### 3-fluorobenzaldehyde (3ai) <sup>1</sup>

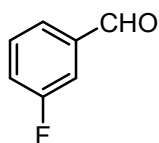

The product was purified by column chromatography on silica gel (eluent: 100:1 petroleum ether: ethyl acetate) as a colorless liquid (13 mg, 36%). <sup>1</sup>H NMR (400 MHz, CDCl<sub>3</sub>) δ 10.03 (d, *J* = 1.8 Hz, 1H), 7.71 (d, *J* = 7.6 Hz, 1H), 7.62 – 7.51 (m, 2H), 7.37 (td, *J* = 8.3, 2.6 Hz, 1H). <sup>13</sup>C NMR (101 MHz, CDCl<sub>3</sub>) δ 190.90 (C-F, <sup>4</sup>*J*<sub>C-F</sub>, *J* = 2.3 Hz), 163.10 (C-F, <sup>1</sup>*J*<sub>C-F</sub>, *J* = 249.4 Hz), 138.40 (C-F, <sup>3</sup>*J*<sub>C-F</sub>, *J* = 6.2 Hz), 130.79 (C-F, <sup>3</sup>*J*<sub>C-F</sub>, *J* = 7.6 Hz), 126.06 (C-F, <sup>4</sup>*J*<sub>C-F</sub>, *J* = 3.0 Hz), 121.60 (C-F, <sup>2</sup>*J*<sub>C-F</sub>, *J* = 21.8 Hz), 115.36 (C-F, <sup>2</sup>*J*<sub>C-F</sub>, *J* = 21.8 Hz).

### 2-chlorobenzaldehyde (3aj) <sup>1</sup>

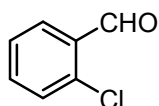

The product was purified by column chromatography on silica gel (eluent: 100:1 petroleum ether: ethyl acetate) as a colorless liquid (26 mg, 63%). <sup>1</sup>H NMR (400 MHz, CDCl<sub>3</sub>) δ 10.51 (s, 1H), 7.95 (m, 1H), 7.57 – 7.53 (m, 1H), 7.50 – 7.46 (m, 1H), 7.41 (t, *J* = 7.5 Hz, 1H). <sup>13</sup>C NMR (101 MHz, CDCl<sub>3</sub>) δ 189.86, 137.97, 135.14, 132.46, 130.62, 129.38, 127.30.

### 4-bromobenzaldehyde (3ak) <sup>1</sup>

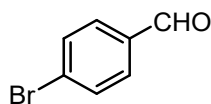

The product was purified by column chromatography on silica gel (eluent: 100:1 petroleum ether: ethyl acetate) as a white solid (39 mg, 72%). <sup>1</sup>H NMR (400 MHz, CDCl<sub>3</sub>) δ 10.00 (s, 1H), 7.77 (d, *J* = 7.7 Hz, 2H), 7.71 (d, *J* = 8.1 Hz, 2H). <sup>13</sup>C NMR (101 MHz, CDCl<sub>3</sub>) δ 191.11, 135.06, 132.45, 130.98, 129.81.

**3,5-dimethylbenzaldehyde (3a)**<sup>19</sup>

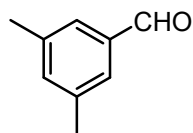

The product was purified by column chromatography on silica gel (eluent: 100:1 petroleum ether: ethyl acetate) as a colorless oil (22 mg, 56%). <sup>1</sup>H NMR (400 MHz, Chloroform-*d*) δ 9.97 (s, 1H), 7.51 (s, 2H), 7.29 (s, 1H), 2.42 (s, 6H). <sup>13</sup>C NMR (101 MHz, Chloroform-*d*) δ 192.86, 138.78, 136.59, 136.24, 127.59, 21.09.

**5,6-dihydro-[1,1'-biphenyl]-3(4H)-one (4a)**<sup>20</sup>

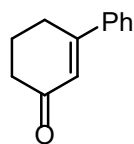

The product was purified by column chromatography on silica gel (eluent: 30:1 petroleum ether: ethyl acetate) as a colorless oil (17 mg, 51%). <sup>1</sup>H NMR (400 MHz, CDCl<sub>3</sub>) δ 7.61 – 7.52 (m, 2H), 7.48 – 7.39 (m, 3H), 6.44 (s, 1H), 2.79 (t, *J* = 5.6 Hz, 2H), 2.50 (t, *J* = 6.5 Hz, 2H), 2.21 – 2.13 (m, 2H). <sup>13</sup>C NMR (101 MHz, CDCl<sub>3</sub>) δ 199.98, 159.85, 138.80, 130.00, 128.77, 126.09, 125.45, 37.29, 28.13, 22.83.

**(1R,6S)-4,7,7-trimethylbicyclo[4.1.0]hept-3-en-2-one (4b)**

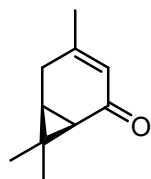

The product was purified by column chromatography on silica gel (eluent: 20:1

petroleum ether: ethyl acetate) as a colorless oil (20 mg, 66%). <sup>1</sup>H NMR (400 MHz, Chloroform-*d*) δ 5.84 (s, 1H), 2.70 – 2.57 (m, 1H), 2.33 (d, *J* = 20.8 Hz, 1H), 1.88 (s, 3H), 1.57 (d, *J* = 7.8 Hz, 1H), 1.46 (t, *J* = 7.8 Hz, 1H), 1.20 (s, 3H), 1.05 (s, 3H). <sup>13</sup>C NMR (151 MHz, Chloroform-*d*) δ 196.65, 158.93, 126.41, 32.85, 28.42, 27.86, 25.85, 23.66, 22.54, 14.37. HRMS (ESI) *m/z*: [M+H]<sup>+</sup> Calcd for C<sub>10</sub>H<sub>15</sub>O 151.1124; Found 151.1119.

**(1R,5R)-4,6,6-trimethylbicyclo[3.1.1]hept-3-en-2-one (4c)<sup>20</sup>**

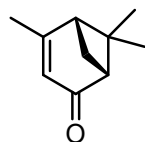

The product was purified by column chromatography on silica gel (eluent: 20:1 petroleum ether: ethyl acetate) as a colorless liquid (21 mg, 71%). <sup>1</sup>H NMR (400 MHz, CDCl<sub>3</sub>) δ 5.77 – 5.72 (m, 1H), 2.86 – 2.77 (m, 1H), 2.67 (td, *J* = 6.0, 1.7 Hz, 1H), 2.44 (t, *J* = 5.8 Hz, 1H), 2.10 (d, *J* = 9.1 Hz, 1H), 2.04 (s, 3H), 1.52 (s, 3H), 1.03 (s, 3H). <sup>13</sup>C NMR (101 MHz, CH<sub>2</sub>Cl<sub>2</sub>) δ 204.05, 170.19, 121.19, 57.60, 54.06, 49.71, 40.86, 26.59, 23.58, 22.05.

**(4S,4aR,6S)-4,4a-dimethyl-6-(prop-1-en-2-yl)-4,4a,5,6,7,8-hexahydronaphthalen-2(3H)-one (4d)<sup>20</sup>**

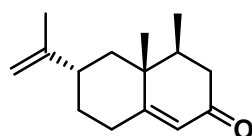

The product was purified by column chromatography on silica gel (eluent: 20:1 petroleum ether: ethyl acetate) as a colorless liquid (30 mg, 69%). <sup>1</sup>H NMR (400 MHz, Chloroform-*d*) δ 5.79 (s, 1H), 4.75 (d, *J* = 10.3 Hz, 2H), 2.59 – 2.49 (m, 1H), 2.42 – 2.25 (m, 4H), 2.07 – 1.91 (m, 3H), 1.76 (s, 3H), 1.42 – 1.31 (m, 1H), 1.19 – 1.11 (m, 4H), 0.99 (d, *J* = 6.8 Hz, 3H). <sup>13</sup>C NMR (101 MHz, Chloroform-*d*) δ 199.69, 170.56, 149.12, 124.70, 109.26, 43.93, 42.09, 40.47, 40.33, 39.33, 33.04, 31.63, 20.84, 16.86,

14.93.

**2-oxo-2-phenylethyl (1S,4R)-4,7,7-trimethyl-3-oxo-2-oxabicyclo[2.2.1]heptane-1-carboxylate (3am)**

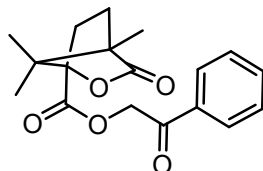

The product was purified by column chromatography on silica gel (eluent: 15:1 petroleum ether: ethyl acetate) as a white solid (38 mg, 41%). <sup>1</sup>H NMR (400 MHz, CDCl<sub>3</sub>) δ 7.94 (d, *J* = 7.5 Hz, 2H), 7.66 (t, *J* = 7.4 Hz, 1H), 7.53 (t, *J* = 7.7 Hz, 2H), 5.52 (q, *J* = 40.0, 16.2 Hz, 2H), 2.61 – 2.51 (m, 1H), 2.19 – 2.10 (m, 1H), 2.04 – 1.95 (m, 1H), 1.80 – 1.71 (m, 1H), 1.19 (s, 3H), 1.18 (s, 6H). <sup>13</sup>C NMR (101 MHz, CDCl<sub>3</sub>) δ 190.83, 178.12, 166.99, 134.16, 133.84, 133.73, 130.19, 129.00, 128.50, 127.76, 91.15, 66.71, 54.98, 54.66, 30.84, 28.96, 16.60, 16.57, 9.79. HRMS (ESI) *m/z*: [M+Na]<sup>+</sup> Calcd for C<sub>18</sub>H<sub>20</sub>NaO<sub>5</sub> 339.1209; Found 339.1208.

**(1R,2S,4S)-1,7,7-trimethylbicyclo[2.2.1]heptan-2-yl 4-(4-methoxyphenyl)-4-oxobutanoate (3an)** <sup>21</sup>

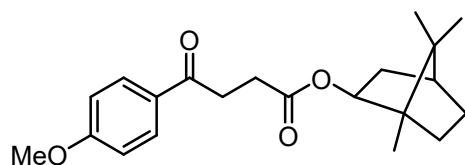

The product was purified by column chromatography on silica gel (eluent: 20:1 petroleum ether: ethyl acetate) as a colorless oil (74 mg, 72%). <sup>1</sup>H NMR (400 MHz, CDCl<sub>3</sub>) δ 7.99 (d, *J* = 8.8 Hz, 2H), 6.96 (d, *J* = 8.8 Hz, 2H), 4.96 – 4.88 (m, 1H), 3.89 (s, 3H), 3.29 (t, *J* = 6.7 Hz, 2H), 2.79 (t, *J* = 6.7 Hz, 2H), 2.39 – 2.30 (m, 1H), 1.96 – 1.88 (m, 1H), 1.77 – 1.72 (m, 1H), 1.70 – 1.61 (m, 1H), 1.29 – 1.21 (m, 2H), 1.01 (dd, *J* = 13.7, 3.4 Hz, 1H), 0.91 (s, 3H), 0.88 (s, 3H), 0.84 (s, 3H). <sup>13</sup>C NMR (101 MHz, CDCl<sub>3</sub>) δ 196.70, 173.28, 163.52, 130.29, 129.77, 113.73, 80.13, 55.48, 48.78, 47.80, 44.87, 36.65, 33.08, 28.74, 27.99, 27.10, 19.71, 18.85, 13.50.



#### 4-(acetoxymethyl)-6-(4-acetylphenoxy)cyclohexane-1,2,3-triyl triacetate (3ao)

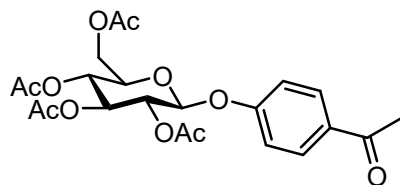

The product was purified by column chromatography on silica gel (eluent: 50:1 petroleum ether: ethyl acetate) as a white solid (114 mg, 82%). <sup>1</sup>H NMR (400 MHz, CDCl<sub>3</sub>) δ 7.96 (d, *J* = 8.7 Hz, 2H), 7.05 (d, *J* = 8.7 Hz, 2H), 5.36 – 5.29 (m, 2H), 5.24 – 5.15 (m, 2H), 4.34 – 4.28 (m, 1H), 4.23 – 4.15 (m, 1H), 3.99 – 3.86 (m, 1H), 2.59 (s, 3H), 2.08 (m, 12H). <sup>13</sup>C NMR (101 MHz, CDCl<sub>3</sub>) δ 196.67, 170.52, 170.21, 169.39, 169.26, 160.24, 132.43, 130.49, 116.25, 98.17, 72.57, 72.26, 71.03, 68.14, 61.89, 26.49, 20.71, 20.62. HRMS (ESI) *m/z*: [M+Na]<sup>+</sup> Calcd for C<sub>22</sub>H<sub>26</sub>NaO<sub>11</sub> 489.1373; Found 489.1400.

#### 4-acetylphenyl 2-(4-(4-chlorobenzoyl)phenoxy)-2-methylpropanoate (3ap) <sup>15</sup>

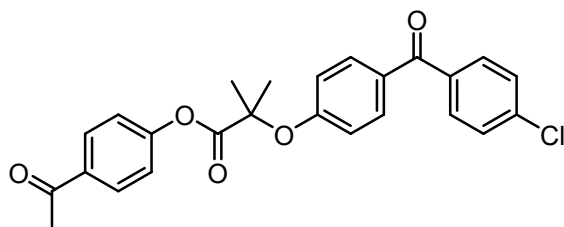

The product was purified by column chromatography on silica gel (eluent: 20:1 petroleum ether: ethyl acetate) as a yellow solid (69 mg, 53%). <sup>1</sup>H NMR (400 MHz, CDCl<sub>3</sub>) δ 8.01 (d, *J* = 8.3 Hz, 2H), 7.82 (d, *J* = 8.4 Hz, 2H), 7.74 (d, *J* = 8.1 Hz, 2H), 7.48 (d, *J* = 8.2 Hz, 2H), 7.12 (d, *J* = 8.3 Hz, 2H), 7.02 (d, *J* = 8.4 Hz, 2H), 2.62 (s, 3H), 1.86 (s, 6H). <sup>13</sup>C NMR (101 MHz, CDCl<sub>3</sub>) δ 196.69, 194.17, 172.02, 159.37, 153.98, 138.56, 136.22, 135.16, 132.18, 131.20, 130.86, 130.05, 128.62, 121.43, 117.32, 79.43, 26.64, 25.43.

#### N-(4-acetylphenyl)-4-(N,N-dipropylsulfamoyl)benzamide (3aq)

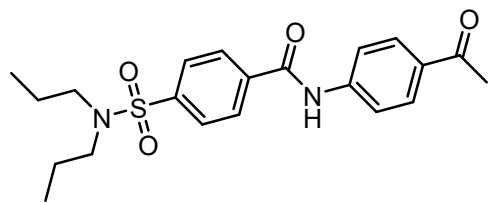

The product was purified by column chromatography on silica gel (eluent: 4:1 petroleum ether: ethyl acetate) as a white solid (86 mg, 72%). <sup>1</sup>H NMR (400 MHz, CDCl<sub>3</sub>) δ 8.70 (s, 1H), 8.01 (d, *J* = 8.1 Hz, 2H), 7.96 (d, *J* = 7.5 Hz, 2H), 7.87 (d, *J* = 8.1 Hz, 2H), 7.77 (d, *J* = 7.5 Hz, 2H), 3.11 (t, *J* = 7.4 Hz, 4H), 2.63 (s, 3H), 1.61 – 1.50 (m, 4H), 0.89 (t, *J* = 7.2 Hz, 6H). <sup>13</sup>C NMR (101 MHz, CDCl<sub>3</sub>) δ 197.08, 164.98, 142.90, 142.27, 138.47, 133.32, 129.75, 128.14, 127.30, 119.52, 49.99, 26.54, 21.93, 11.17. HRMS (ESI) *m/z*: [M+H]<sup>+</sup> Calcd for C<sub>21</sub>H<sub>27</sub>N<sub>2</sub>O<sub>4</sub>S 403.1691; Found 403.1689.

**7-acetyl-5-(tert-butyl)-3,3-dimethyl-2,3-dihydro-1H-inden-1-one (3ar)**<sup>22</sup>

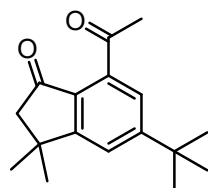

The product was purified by column chromatography on silica gel (eluent: 40:1 petroleum ether: ethyl acetate) as a white solid (45 mg, 58%). <sup>1</sup>H NMR (400 MHz, CDCl<sub>3</sub>) δ 7.56 (d, *J* = 1.6 Hz, 1H), 7.35 (d, *J* = 1.6 Hz, 1H), 2.65 (s, 3H), 2.62 (s, 2H), 1.45 (s, 6H), 1.38 (s, 9H). <sup>13</sup>C NMR (101 MHz, CDCl<sub>3</sub>) δ 204.69, 204.05, 164.59, 159.41, 139.21, 129.35, 123.25, 121.76, 53.25, 38.70, 35.77, 31.13, 30.94, 30.03.

**4,6,6,7,8-hexamethyl-4,6,7,8-tetrahydrocyclopenta[g]isochromen-1(3H)-one (3as)**

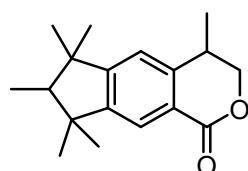

The product was purified by column chromatography on silica gel (eluent: 30:1 petroleum ether: ethyl acetate) as a white solid (40 mg, 49%). <sup>1</sup>H NMR (400 MHz, CDCl<sub>3</sub>) δ 7.93 (s, 1H), 7.07 (s, 1H), 4.56 – 4.44 (m, 1H), 4.30 – 4.17 (m, 1H), 3.16 (s,

1H), 1.96 – 1.82 (m, 1H), 1.42 – 1.29 (m, 9H), 1.14 – 1.00 (m, 9H). <sup>13</sup>C NMR (101 MHz, CDCl<sub>3</sub>) δ 165.85, 158.35, 151.15, 143.46, 125.06, 122.96, 119.81, 72.50, 54.14, 45.24, 44.61, 32.03, 29.06, 28.78, 25.78, 25.69, 16.96, 8.46. HRMS (ESI) m/z: [M+H]<sup>+</sup> Calcd for C<sub>18</sub>H<sub>25</sub>O<sub>2</sub> 273.1854; Found 273.1848.

**7-isopropyl-1,4a-dimethyl-9-oxo-1,2,3,4,4a,9,10,10a-octahydrophenanthrene-1-carboxylic acid (3at)**<sup>9</sup>

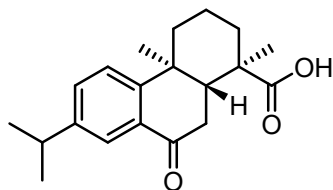

The product was purified by column chromatography on silica gel (eluent: 15:1 petroleum ether: ethyl acetate) as a colorless oil (77 mg, 82%). <sup>1</sup>H NMR (400 MHz, CDCl<sub>3</sub>) δ 7.89 (s, 1H), 7.43 (d, *J* = 8.1 Hz, 1H), 7.31 (d, *J* = 8.2 Hz, 1H), 3.00 – 2.88 (m, 1H), 2.79 – 2.69 (m, 2H), 2.51 (d, *J* = 14.5 Hz, 1H), 2.39 (d, *J* = 12.4 Hz, 1H), 1.88 – 1.79 (m, 4H), 1.71 – 1.64 (m, 1H), 1.37 (s, 3H), 1.29 – 1.25 (m, 9H). <sup>13</sup>C NMR (101 MHz, CDCl<sub>3</sub>) δ 198.90, 183.02, 153.00, 146.97, 132.73, 130.61, 125.13, 123.51, 46.38, 43.56, 37.76, 37.15 (d, *J* = 18.9 Hz), 36.50, 33.61, 23.84, 23.76, 23.68, 18.13, 16.16.

**(5-bromo-2-methylphenyl)(5-(4-fluorophenyl)thiophen-2-yl)methanone (3au)**

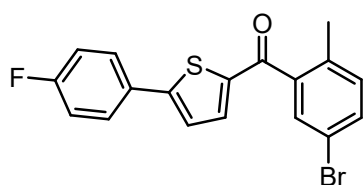

The product was purified by column chromatography on silica gel (eluent: 50:1 petroleum ether: ethyl acetate) as a white solid (92 mg, 82%). <sup>1</sup>H NMR (400 MHz, CDCl<sub>3</sub>) δ 7.71 – 7.65 (m, 2H), 7.60 (d, *J* = 2.0 Hz, 1H), 7.56 – 7.52 (m, 1H), 7.40 (d, *J* = 4.0 Hz, 1H), 7.29 (d, *J* = 1.3 Hz, 1H), 7.22 – 7.12 (m, 3H), 2.36 (s, 3H). <sup>13</sup>C NMR (101 MHz, CDCl<sub>3</sub>) δ 188.42, 163.37 (C-F, <sup>1</sup>*J*<sub>C-F</sub>, *J* = 250.3 Hz), 153.36, 142.72, 140.05, 136.85, 135.40, 133.18, 132.76, 130.51, 129.48 (C-F, <sup>4</sup>*J*<sub>C-F</sub>, = 3.4 Hz), 128.25 (C-F, <sup>3</sup>*J*<sub>C-F</sub> = 8.3 Hz), 124.14, 118.83, 116.32 (C-F, <sup>2</sup>*J*<sub>C-F</sub> = 22.0 Hz), 19.23. HRMS (ESI) m/z:

[M+H]<sup>+</sup> Calcd for C<sub>18</sub>H<sub>13</sub>BrFOS 374.9854; Found 374.9851.

**3-methoxy-11-methyl-5,6,7,8,8a,9-hexahydro-10H-9,4b-(epiminoethano)phenanthrene-10-one (3av)**

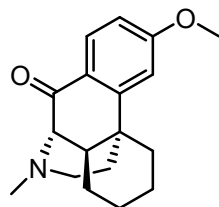

The product was purified by column chromatography on silica gel (eluent: 10:1 petroleum ether: ethyl acetate) as a white solid (38 mg, 45%). <sup>1</sup>H NMR (400 MHz, CDCl<sub>3</sub>) δ 8.07 (d, *J* = 8.7 Hz, 1H), 6.87 (d, *J* = 8.7 Hz, 1H), 6.82 (s, 1H), 3.90 (s, 3H), 3.02 (s, 1H), 2.65 (d, *J* = 8.1 Hz, 1H), 2.40 (d, *J* = 13.8 Hz, 4H), 2.09 (t, *J* = 12.9 Hz, 2H), 1.93 (t, *J* = 12.8 Hz, 1H), 1.67 (d, *J* = 12.3 Hz, 1H), 1.61 – 1.48 (m, 3H), 1.47 – 1.35 (m, 2H), 1.27 (t, *J* = 12.8 Hz, 1H), 1.20 – 1.07 (m, 1H). <sup>13</sup>C NMR (101 MHz, CDCl<sub>3</sub>) δ 194.11, 164.91, 147.86, 128.81, 128.53, 111.76, 111.52, 68.58, 55.42, 47.69, 47.31, 43.23, 41.29, 38.17, 36.48, 26.12, 25.97, 21.95. HRMS (ESI) *m/z*: [M+H]<sup>+</sup> Calcd for C<sub>18</sub>H<sub>24</sub>NO<sub>2</sub> 286.1807; Found 286.1802.

**5-(2-formyl-5-methylphenoxy)-2,2-dimethylpentanoic acid (3aw) <sup>9</sup>**

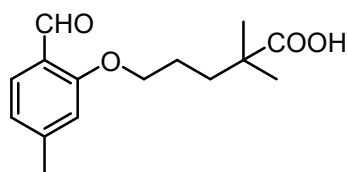

The product was purified by column chromatography on silica gel (eluent: 10:1 petroleum ether: ethyl acetate) as a light yellow oil (46 mg, 59%). <sup>1</sup>H NMR (400 MHz, CDCl<sub>3</sub>) δ 10.45 (s, 1H), 7.74 (d, *J* = 7.9 Hz, 1H), 6.84 (d, *J* = 7.8 Hz, 1H), 6.77 (s, 1H), 4.08 (t, *J* = 5.9 Hz, 2H), 2.41 (s, 3H), 1.92 – 1.81 (m, 2H), 1.82 – 1.71 (m, 2H), 1.28 (s, 6H). <sup>13</sup>C NMR (101 MHz, CDCl<sub>3</sub>) δ 189.60, 183.54, 161.46, 147.47, 128.29, 122.62, 121.66, 112.96, 68.43, 41.91, 36.77, 25.05, 24.92, 22.37.

**3,17-dihydroxy-13-methyl-7,8,9,11,12,13,14,15,16,17-decahydro-6H-cyclopenta[a]phenanthren-6-one (3ax) <sup>23</sup>**

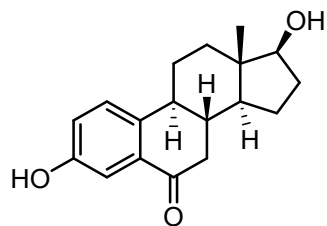

The product was purified by column chromatography on silica gel (eluent: 10:1 petroleum ether: ethyl acetate) as a white solid (35 mg, 41%).  $^1\text{H}$  NMR (400 MHz, DMSO)  $\delta$  9.58 (s, 1H), 7.31 (d,  $J = 8.5$  Hz, 1H), 7.27 (d,  $J = 2.4$  Hz, 1H), 7.00 (dd,  $J = 8.3, 2.5$  Hz, 1H), 4.54 (s, 1H), 3.54 (t,  $J = 8.1$  Hz, 1H), 2.44 – 2.18 (m, 3H), 1.90 – 1.77 (m, 2H), 1.62 – 1.14 (m, 8H), 0.66 (s, 3H).  $^{13}\text{C}$  NMR (101 MHz, DMSO)  $\delta$  197.64, 156.12, 138.36, 133.44, 127.21, 121.69, 112.24, 80.30, 49.64, 43.95, 43.06, 42.61, 36.60, 30.23, 25.66, 22.88, 11.50.

**3,17-dihydroxy-13-methyl-7,8,9,11,12,13,14,15,16,17-decahydro-6H-cyclopenta[a]phenanthren-6-one (3ay)**

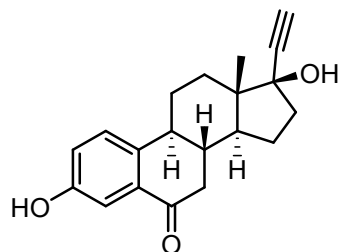

The product was purified by column chromatography on silica gel (eluent: 10:1 petroleum ether: ethyl acetate) as a white solid (57mg, 61%).  $^1\text{H}$  NMR (400 MHz, DMSO)  $\delta$  9.62 (s, 1H), 7.32 (d,  $J = 8.2$  Hz, 1H), 7.27 (s, 1H), 7.00 (d,  $J = 8.2$  Hz, 1H), 5.40 (s, 1H), 2.43 – 2.26 (m, 3H), 2.11 (s, 1H), 1.91 – 1.60 (m, 7H), 1.47 – 1.22 (m, 3H), 0.75 (s, 3H).  $^{13}\text{C}$  NMR (101 MHz, DMSO)  $\delta$  197.62, 156.12, 138.26, 133.40, 127.31, 121.69, 112.18, 89.20, 78.43, 75.78, 49.10, 46.89, 43.90, 42.31, 40.69, 39.11, 32.66, 25.68, 22.56, 12.97. HRMS (ESI)  $m/z$ :  $[\text{M}+\text{H}]^+$  Calcd for  $\text{C}_{20}\text{H}_{23}\text{O}_3$  311.1647; Found 311.1642.

**2,5,7,8-tetramethyl-4-oxo-2-(4,8,12-trimethyltridecyl)chroman-6-yl nicotinate (3az)<sup>9</sup>**

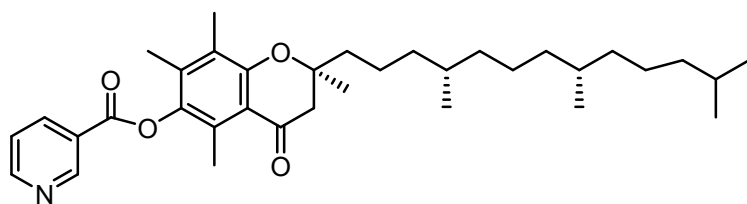

The product was purified by column chromatography on silica gel (eluent: 40:1 petroleum ether: ethyl acetate) as a brown solid (49 mg, 30%).  $^1\text{H}$  NMR (400 MHz,  $\text{CDCl}_3$ )  $\delta$  9.47 (s, 1H), 8.91 (s, 1H), 8.51 (dt,  $J = 8.0, 1.8$  Hz, 1H), 7.51 (dd,  $J = 7.8, 4.9$  Hz, 1H), 2.79 (t,  $J = 14.8$  Hz, 1H), 2.64 (t,  $J = 16.1$  Hz, 1H), 2.46 (s, 3H), 2.20 (s, 3H), 2.15 (s, 3H), 1.83 – 1.67 (m, 2H), 1.58 – 1.49 (m, 2H), 1.42 – 1.12 (m, 20H), 0.88 (m, 12H).  $^{13}\text{C}$  NMR (101 MHz,  $\text{CDCl}_3$ )  $\delta$  194.37, 163.62, 156.63, 154.06, 141.48, 137.64, 136.73, 128.95, 125.21, 124.57, 123.59, 116.96, 80.21, 49.05, 39.37, 37.44, 37.39, 37.29, 37.23, 37.19, 37.15, 37.11, 32.79, 32.64, 27.96, 24.79 (d,  $J = 1.0$  Hz), 24.42, 22.69, 22.60, 21.05, 19.73, 19.67, 19.61, 19.58, 19.54, 19.52, 14.02 (d,  $J = 11.2$  Hz), 12.12.

#### 5-acetyl-5,11-dihydro-10H-dibenzo[b,f]azepin-10-one (3ba)<sup>10</sup>

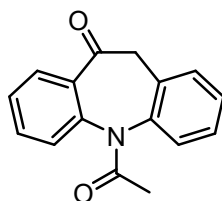

The product was purified by column chromatography on silica gel (eluent: 10:1 petroleum ether: ethyl acetate) as a white solid (58 mg, 77%).  $^1\text{H}$  NMR (400 MHz,  $\text{CDCl}_3$ )  $\delta$  8.13 (d,  $J = 7.7$  Hz, 1H), 7.60 (d,  $J = 6.1$  Hz, 2H), 7.48 – 7.31 (m, 5H), 4.37 (d,  $J = 14.4$  Hz, 1H), 3.89 (d,  $J = 14.6$  Hz, 1H), 2.15 (s, 3H).  $^{13}\text{C}$  NMR (101 MHz,  $\text{CDCl}_3$ )  $\delta$  191.74, 169.83, 142.44, 133.95, 130.72, 130.08, 129.11, 128.80, 128.57, 127.72, 49.08, 23.19.

#### oxcarbazepine (3bb)<sup>21</sup>

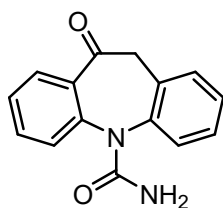

The product was purified by column chromatography on silica gel (eluent: 10:1 petroleum ether: ethyl acetate) as a white solid (41 mg, 55%).  $^1\text{H}$  NMR (600 MHz,  $\text{CDCl}_3$ )  $\delta$  8.12 (d,  $J = 7.9$  Hz, 1H), 7.68 (d,  $J = 8.0$  Hz, 1H), 7.60 (t,  $J = 7.6$  Hz, 1H), 7.53 – 7.50 (m, 1H), 7.44 – 7.40 (m, 1H), 7.39 – 7.33 (m, 3H), 5.02 (s, 2H), 4.47 (d,  $J = 14.2$  Hz, 1H), 3.87 (d,  $J = 14.2$  Hz, 1H).  $^{13}\text{C}$  NMR (151 MHz,  $\text{CDCl}_3$ )  $\delta$  191.79, 155.71, 143.09, 141.35, 134.03, 133.98, 130.68, 130.24, 129.91, 129.35, 129.04, 128.70, 127.80, 127.36, 49.0.

**ethyl 2-(4-(1-oxoisindolin-2-yl)phenyl)butanoate (3bc)**<sup>24</sup>

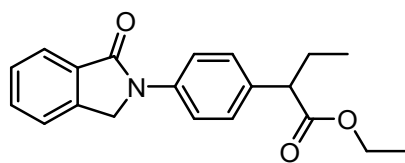

The product was purified by column chromatography on silica gel (eluent: 20:1 petroleum ether: ethyl acetate) as a yellow solid (46 mg, 48%).  $^1\text{H}$  NMR (400 MHz,  $\text{CDCl}_3$ )  $\delta$  7.94 (d,  $J = 7.4$  Hz, 1H), 7.84 (d,  $J = 8.7$  Hz, 2H), 7.60 (d,  $J = 6.5$  Hz, 1H), 7.53 (d,  $J = 7.6$  Hz, 2H), 7.39 (d,  $J = 8.7$  Hz, 2H), 4.86 (s, 2H), 4.25 – 4.05 (m, 2H), 3.47 (t,  $J = 7.7$  Hz, 1H), 2.19 – 2.05 (m, 1H), 1.87 – 1.78 (m, 1H), 1.24 (t,  $J = 7.1$  Hz, 3H), 0.93 (t,  $J = 7.4$  Hz, 3H).  $^{13}\text{C}$  NMR (101 MHz,  $\text{CDCl}_3$ )  $\delta$  174.03, 167.48, 140.09, 138.47, 135.33, 133.18, 132.09, 128.71, 128.40, 124.15, 122.64, 119.55, 60.70, 52.97, 50.74, 26.77, 14.20, 12.18.

**4-([1,1'-biphenyl]-4-yl)-4-oxobutanoic acid (3bd)**<sup>21</sup>

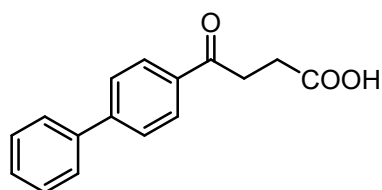

The product was purified by column chromatography on silica gel (eluent: 20:1

petroleum ether: ethyl acetate) as a white solid (39 mg, 52%). <sup>1</sup>H NMR (400 MHz, DMSO) δ 12.17 (s, 1H), 8.07 (d, *J* = 7.8 Hz, 2H), 7.84 (d, *J* = 7.7 Hz, 2H), 7.76 (d, *J* = 7.2 Hz, 2H), 7.52 (t, *J* = 7.2 Hz, 2H), 7.44 (t, *J* = 6.7 Hz, 1H), 3.31 3.29 (t, *J* = 5.4 Hz, 2H), 2.61 (t, *J* = 5.4 Hz, 2H). <sup>13</sup>C NMR (101 MHz, DMSO) δ 198.50, 174.30, 145.00, 139.37, 135.71, 129.57, 129.05, 128.86, 127.45, 127.37, 33.60, 28.36.

**2,6,10,10-tetramethyl-1-oxaspiro[4.5]dec-6-en-8-one (4e)** <sup>20</sup>

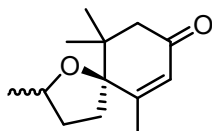

The product was purified by column chromatography on silica gel (eluent: 40:1 petroleum ether: ethyl acetate) as a colorless oil (30 mg, 73%). <sup>1</sup>H NMR (400 MHz, CDCl<sub>3</sub>) δ 5.75 (d, *J* = 15.1 Hz, 1H), 4.30 – 4.14 (m, 1H), 2.43 – 2.19 (m, 3H), 2.16 – 2.03 (m, 1H), 1.99 (d, *J* = 7.2 Hz, 3H), 1.86 – 1.75 (m, 1H), 1.65 – 1.47 (m, 1H), 1.32 (d, *J* = 5.9 Hz, 3H), 1.06 (d, *J* = 20.0 Hz, 3H), 1.01 (d, *J* = 12.7 Hz, 3H). <sup>13</sup>C NMR (101 MHz, CDCl<sub>3</sub>) δ 198.71, 198.34, 168.27, 125.27, 124.87, 88.52, 77.95, 77.70, 50.23, 49.91, 41.62, 40.78, 35.01, 34.30, 32.69, 24.50, 24.40, 23.71, 23.00, 21.31, 20.44, 18.95.

**3-hydroxy-10,13-dimethyl-1,3,4,8,9,10,11,12,13,14,15,16-dodecahydro-7H-cyclopenta[a]phenanthrene-7,17(2H)-dione (4f)** <sup>20</sup>

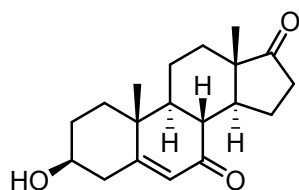

The product was purified by column chromatography on silica gel (eluent: 10:1 petroleum ether: ethyl acetate) as a white solid (39 mg, 65%). <sup>1</sup>H NMR (400 MHz, CDCl<sub>3</sub>) δ 5.76 (s, 1H), 3.78 – 3.59 (m, 1H), 2.90 – 2.73 (m, 1H), 2.60 – 2.37 (m, 4H), 2.21 – 2.08 (m, 1H), 2.01 – 1.55 (m, 10H), 1.26 (d, *J* = 14.4 Hz, 4H), 0.91 (s, 3H). <sup>13</sup>C NMR (151 MHz, CDCl<sub>3</sub>) δ 220.40, 201.08, 166.20, 125.93, 70.30, 50.11, 47.88, 45.76, 44.35, 41.88, 38.42, 36.32, 35.65, 31.12, 30.73, 24.18, 20.60, 17.45, 13.76.



**3-hydroxy-10,13-dimethyl-17-((S)-6-methylheptan-2-yl)-1,2,3,4,8,9,10,11,12,13,14,15,16,17-tetradecahydro-7H-cyclopenta[a]phenanthren-7-one (4g)** <sup>25</sup>

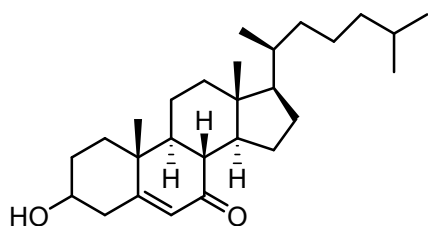

The product was purified by column chromatography on silica gel (eluent: 20:1 petroleum ether: ethyl acetate) as a white solid (32 mg, 40%). <sup>1</sup>H NMR (400 MHz, CDCl<sub>3</sub>) δ 5.70 (s, 1H), 3.74 – 3.62 (m, 1H), 2.52 (d, *J* = 16.6 Hz, 1H), 2.41 (t, *J* = 12.0 Hz, 2H), 2.25 (t, *J* = 11.2 Hz, 1H), 2.08 – 1.88 (m, 5H), 1.68 – 1.46 (m, 5H), 1.36 – 1.03 (m, 15H), 0.93 (d, *J* = 6.4 Hz, 3H), 0.88 (d, *J* = 6.6 Hz, 6H), 0.69 (s, 3H). <sup>13</sup>C NMR (101 MHz, CDCl<sub>3</sub>) δ 202.30, 165.16, 126.09, 70.50, 54.83, 49.97 (d, *J* = 2.8 Hz), 45.42, 43.11, 41.83, 39.48, 38.73, 38.29, 36.37, 36.19, 35.71, 31.20, 28.54, 28.00, 26.32, 23.84, 22.80, 22.55, 21.23, 18.88, 17.32, 11.98.

**17-acetyl-3-hydroxy-10,13-dimethyl-1,2,3,4,8,9,10,11,12,13,14,15,16,17-tetradecahydro-7H-cyclopenta[a]phenanthren-7-one (4h)** <sup>25</sup>

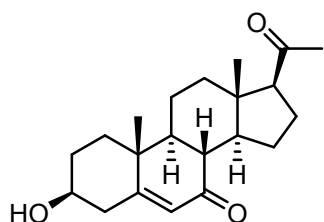

The product was purified by column chromatography on silica gel (eluent: 10:1 petroleum ether: ethyl acetate) as a white solid (32 mg, 49%). <sup>1</sup>H NMR (400 MHz, CDCl<sub>3</sub>) δ 5.71 (s, 1H), 3.69 (s, 1H), 2.55 – 2.49 (m, 2H), 2.40 (t, *J* = 12.4 Hz, 1H), 2.28 ((t, *J* = 12.4 Hz, 1H), 2.14 (s, 3H), 2.08 – 1.94 (m, 4H), 1.79 – 1.37 (m, 10H), 1.21 (s, 3H), 0.67 (s, 3H). <sup>13</sup>C NMR (101 MHz, CDCl<sub>3</sub>) δ 209.84, 201.59, 165.71, 125.83, 70.36, 62.30, 50.01, 49.78, 45.23, 44.41, 41.86, 38.36, 37.68, 36.38, 31.62, 31.10, 26.47, 23.61, 21.14, 17.33, 13.27.

**4-hydroxy-5',6a,8a,9-tetramethyl-3',4,4',5,5',6,6a,6b,6',7,8,8a,8b,9,11a,12,12a,12b**

**-octadecahydrospiro[naphtho[2',1':4,5]indeno[2,1-b]furan-10,2'-pyran]-1(3H)-one (4i)** <sup>25</sup>

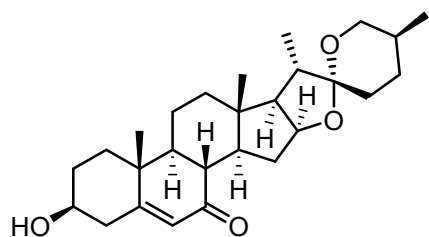

The product was purified by column chromatography on silica gel (eluent: 10:1 petroleum ether: ethyl acetate) as a white solid (32 mg, 37%). <sup>1</sup>H NMR (400 MHz, CDCl<sub>3</sub>) δ 5.72 (s, 1H), 4.54 – 4.45 (m, 1H), 3.74 – 3.64 (m, 1H), 3.49 (d, *J* = 9.0 Hz, 1H), 3.41 (t, *J* = 10.7 Hz, 1H), 2.94 – 2.84 (m, 1H), 2.54 (d, *J* = 13.2 Hz, 1H), 2.42 (t, *J* = 12.3 Hz, 2H), 1.97 (d, *J* = 11.3 Hz, 2H), 1.91 – 1.86 (m, 1H), 1.77 – 1.42 (m, 15H), 1.24 (s, 3H), 1.00 (d, *J* = 6.7 Hz, 3H), 0.81 (s, 6H). <sup>13</sup>C NMR (101 MHz, CDCl<sub>3</sub>) δ 201.74, 165.38, 125.92, 109.23, 80.95, 70.46, 66.81, 61.08, 49.79, 49.49, 44.88, 41.87, 41.58, 40.96, 38.72, 38.42, 36.34, 33.72, 31.43, 31.15, 30.32, 28.80, 20.96, 17.34, 17.14, 16.45, 14.66.

**methyl-2,2,6a,6b,9,9,12a-heptamethyl-10,13-dioxo-1,3,4,5,6,6a,6b,7,8,8a,9,10,11,12,12a,12b,13,14b-octadecahdropicene-4a(2H)-carboxylate (4j)** <sup>25</sup>

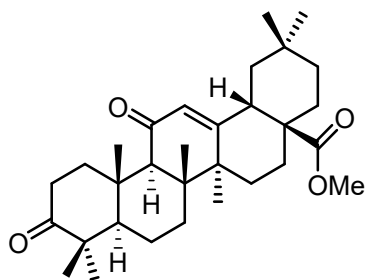

The product was purified by column chromatography on silica gel (eluent: 10:1 petroleum ether: ethyl acetate) as a white solid (69 mg, 72%). <sup>1</sup>H NMR (400 MHz, CDCl<sub>3</sub>) δ 5.65 (s, 1H), 3.65 (s, 3H), 3.27 – 3.19 (m, 1H), 3.02 (d, *J* = 12.9 Hz, 1H), 2.85 (d, *J* = 13.5 Hz, 1H), 2.33 (s, 1H), 2.06 (t, *J* = 13.6 Hz, 1H), 1.78 – 1.49 (m, 11H), 1.38 (s, 3H), 1.29 – 1.21 (m, 4H), 1.12 (s, 3H), 1.01 (s, 3H), 0.94 (d, *J* = 7.9 Hz, 9H), 0.81 (s, 3H), 0.70 (d, *J* = 11.6 Hz, 1H). <sup>13</sup>C NMR (101 MHz, CDCl<sub>3</sub>) δ 200.38, 177.52, 168.69, 127.91, 78.77, 61.79, 55.01, 51.92, 46.22, 45.04, 44.26, 43.48, 41.58, 39.14,

37.28, 33.71, 32.89, 31.61, 30.69, 28.12, 27.76, 27.32, 23.52 (d,  $J = 15.0$  Hz), 22.96, 18.94, 17.41, 16.20, 15.58.

## 6. References

- [1] H. Wang, Y. Xu, F. Zhang, Y. Liu, X. Feng, *Angew. Chem. Int. Ed.* DOI: 10.1002/ange.202115715.
- [2] a) X. Han, Z. Zhou, K. Wang, Z. Zheng, S. E. Neumann, H. Zhang, T. Ma, O. M. Yaghi, *J. Am. Chem. Soc.* **2024**, *146*, 89–94. b) S.-L. Qi, Y. Li, J.-F. Li, T. Zhang, Y.-X. Luan, M. Ye, *Org. Lett.* **2021**, *23*, 4034–4039. c) J. Zhou, M. Jia, M. Song, Z. Huang, A. Steiner, Q. An, J. Ma, Z. Guo, Q. Zhang, H. Sun, C. Robertson, J. Bacsá, J. Xiao, C. Li, *Angew. Chem. Int. Ed.* DOI: 10.1002/ange.202205983. d) C. Li, Y. Huang, S. Cao, Y. Luo, Y. Zhang, G. Yang, *Org. Chem. Front.* **2021**, *8*, 6182–6186. e) E. Nakata, Y. Yukimachi, Y. Nazumi, M. Uwate, H. Maseda, Y. Uto, T. Hashimoto, Y. Okamoto, H. Hori, T. Morii, *RSC Adv.* **2014**, *4*, 348–357. f) P. Di Fruscia, K.-K. Ho, S. Laohasinnarong, M. Khongkow, S. H. B. Kroll, S. A. Islam, M. J. E. Sternberg, K. Schmidt-kunz, M. Jung, E. W.-F. Lam, M. J. Fuchter, *MedChemComm* **2012**, *3*, 373. g) T. Thatikonda, S. K. Deepake, U. Das, *Org. Lett.* **2019**, *21*, 2532–2535. h) C. Bo, Q. Bu, J. Liu, B. Dai, N. Liu, *ACS Sustain. Chem. Eng.* **2022**, *10*, 1822–1828.
- [3] a) J. B. Metternich, R. Gilmour, *J. Am. Chem. Soc.* **2015**, *137*, 11254–11257. b) K. Chen, H. Zhu, Y. Li, Q. Peng, Y. Guo, X. Wang, *ACS Catal.* **2021**, *11*, 13696–13705.
- [4] M. Cismesia, T. Yoon, *Chem. Sci.* **2015**, *6*, 5426–5434.
- [5] C. Hatchard, C. Parker, *Proc. Roy. Soc. (London)*, **1956**, A235, 518–536.
- [6] A. Gonzalez-de-Castro, J. Xiao, *J. Am. Chem. Soc.* **2015**, *137*, 8206–8218.
- [7] Z. Li, Y. Zhang, K. Li, Z. Zhou, Z. Zha, Z. Wang, *Sci China Chem.* **2021**, *64*, 2134–2141.
- [8] D. Ye, Z. Liu, J. L. Sessler, C. Lei, *Chem. Commun.* **2020**, *56*, 11811–11814.
- [9] P. Hu, M. Tan, L. Cheng, H. Zhao, R. Feng, W.-J. Gu, W. Han, *Nat. Commun.* **2019**, *10*, 2425–2433.
- [10] J. Zhou, M. Jia, M. Song, Z. Huang, A. Steiner, Q. An, J. Ma, Z. Guo, Q. Zhang, H. Sun, C. Robertson, J. Bacsá, J. Xiao, C. Li, *Angew. Chem. Int. Ed.* DOI: 10.1002/ange.202205983.
- [11] Y. Geng, Y. Ma, R. Huang, X. Li, S. Yu, *Green Chem.* **2023**, *25*, 221–228.
- [12] X. Xu, S. Li, S. Luo, J. Yang, F. Li, *J. Catal.* **2022**, *413*, 365–373.
- [13] A. H. Bansode, G. Suryavanshi, *Adv. Synth. Catal.* **2021**, *363*, 1390–1400.
- [14] Y.-H. Wang, Q. Yang, P. J. Walsh, E. J. Schelter, *Org. Chem. Front.* **2022**, *9*, 2612–2620.
- [15] K. Niu, X. Shi, L. Ding, Y. Liu, H. Song, Q. Wang, *ChemSusChem*, **2022**, DOI: 10.1002/cssc.202102326.
- [16] R. Lv, Y. Wang, C. Zhou, L. Li, R. Wang, *ChemCatChem* **2013**, *5*, 2978–2982.
- [17] A. J. Catino, J. M. Nichols, H. Choi, S. Gottipamula, M. P. Doyle, *Org. Lett.* **2005**, *7*, 5167–5170.
- [18] Q. Fan, D. Liu, Z. Xie, Z. Le, H. Zhu, X. Song, *J. Org. Chem.* **2023**, *88*, 14559–14570.
- [19] X. Jiang, J.-M. Wang, Y. Zhang, Z. Chen, Y.-M. Zhu, S.-J. Ji, *Org. Lett.* **2014**, *16*, 3492–3495.
- [20] E. J. Horn, B. R. Rosen, Y. Chen, J. Tang, K. Chen, M. D. Eastgate, P. S. Baran, *Nature* **2016**, *533*, 77–81.
- [21] S. Tang, S. Wang, D. Zhang, X. Zhang, G. Yang, Y. Wang, Y. Qiu, *Chin. Chem. Lett.* **2024**, *35*, 108660.
- [22] J. A. Marko, A. Durgham, S. L. Bretz, W. Liu, *Chem. Commun.* **2019**, *55*, 937–940. [23] L. Zhao, Q. Meng, X. Fan, C. Ye, X. Li, B. Chen, V. Ramamurthy, C. Tung, L. Wu, *Angew. Chem. Int. Ed.* **2017**, *56*, 3020–3024.
- [24] P. Geng, Y. Tang, G. Pan, W. Wang, J. Hu, Y. Cai, *Green Chem.* **2019**, *21*, 6116–6122.
- [25] C. Liu, H. Liu, X. Zheng, S. Chen, Q. Lai, C. Zheng, M. Huang, K. Cai, Z. Cai, S. Cai, *ACS Catal.* **2022**, *12*, 1375–1381.

## 7. $^1\text{H}$ , $^{13}\text{C}$ and $^{19}\text{F}$ NMR spectra of products

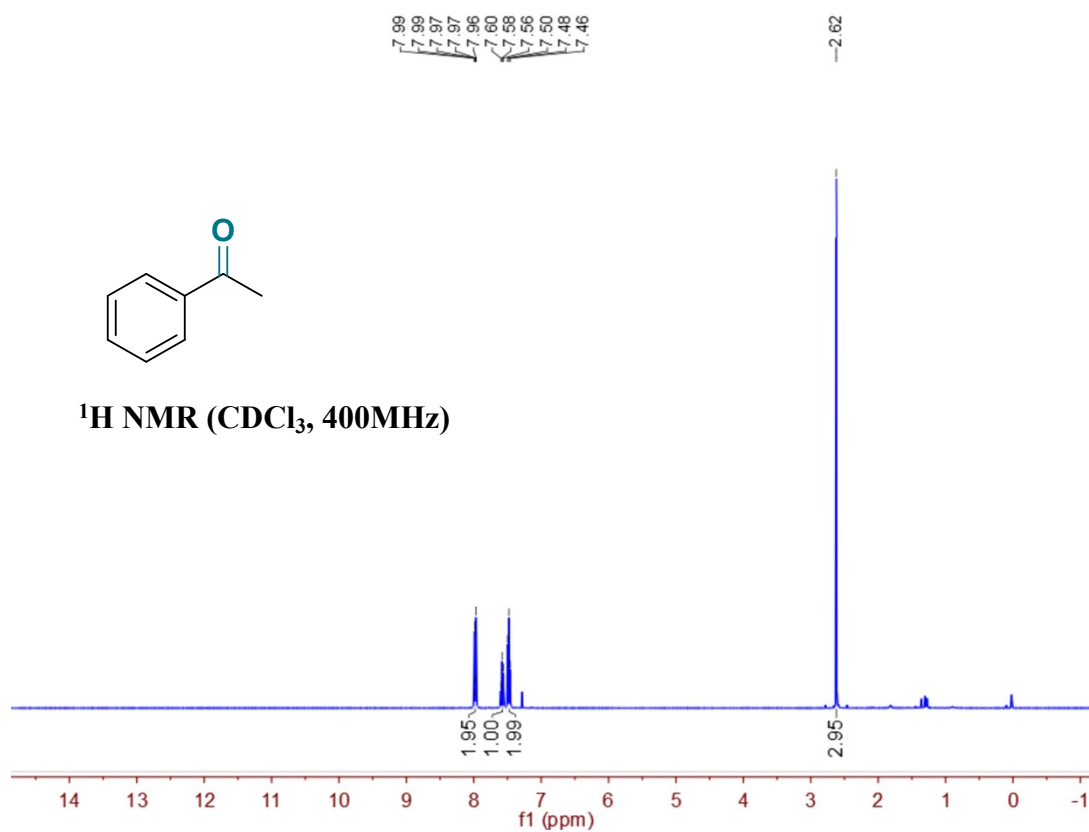

$^1\text{H}$  NMR Spectrum of Compound 3a

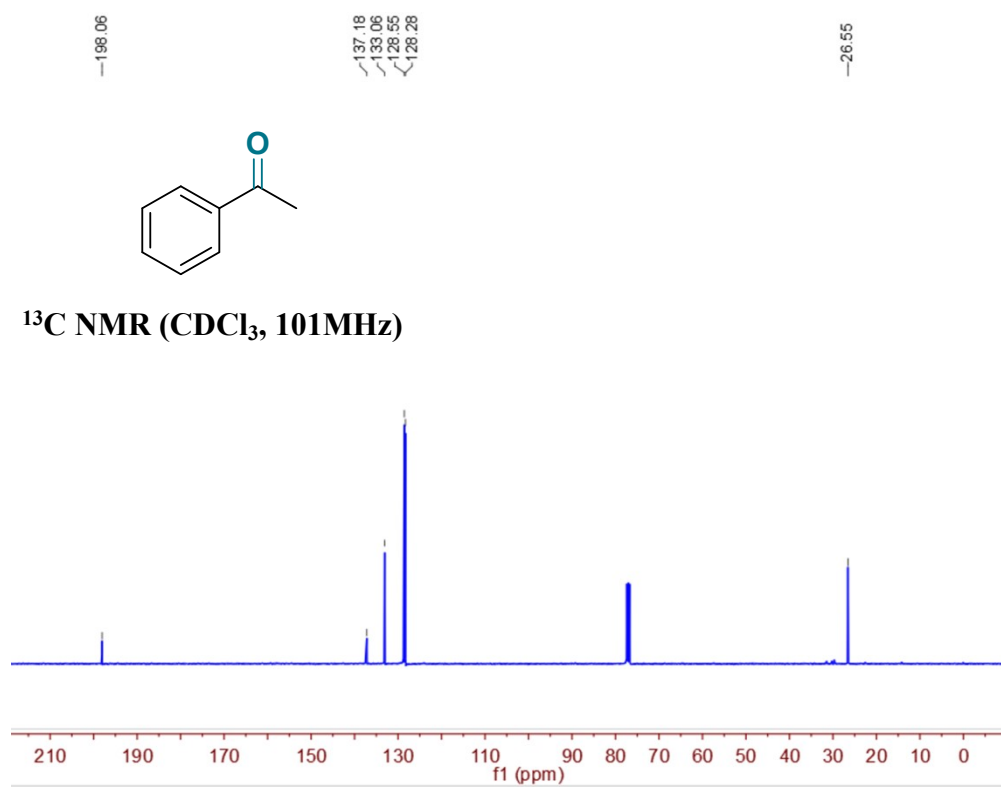

$^{13}\text{C}$  NMR Spectrum of Compound 3a

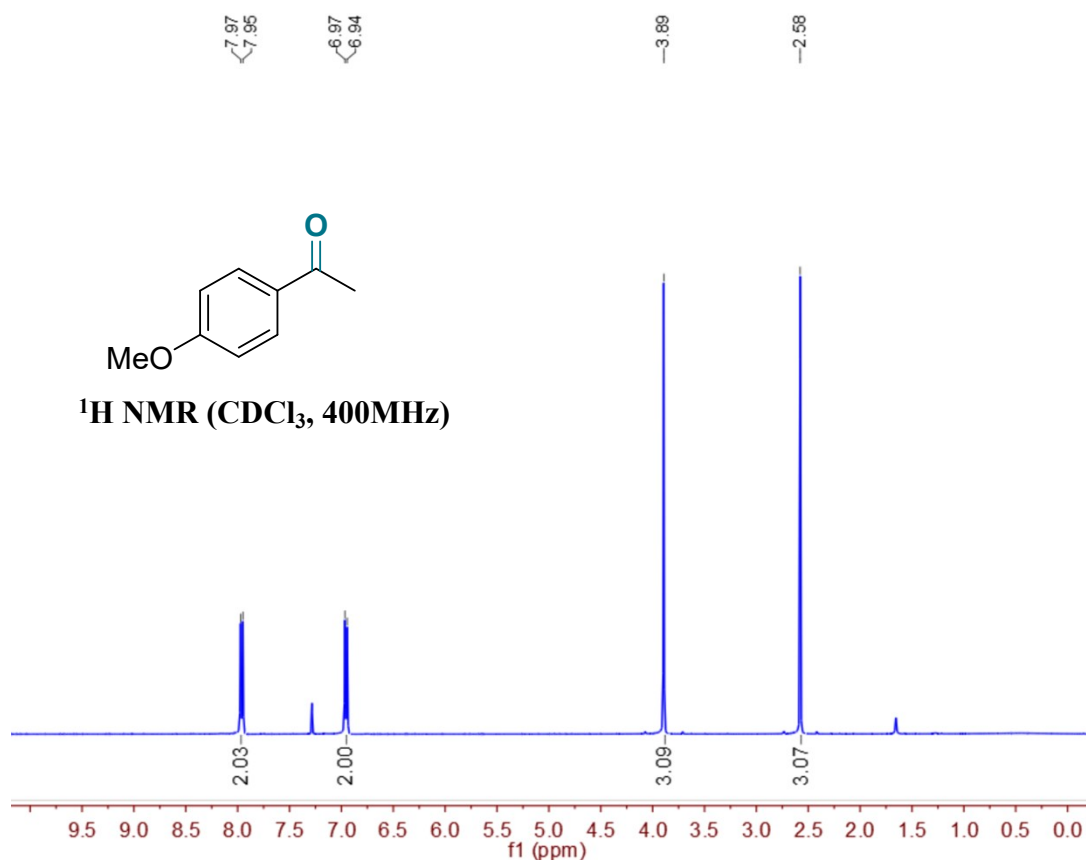

**<sup>1</sup>H NMR Spectrum of Compound 3b**

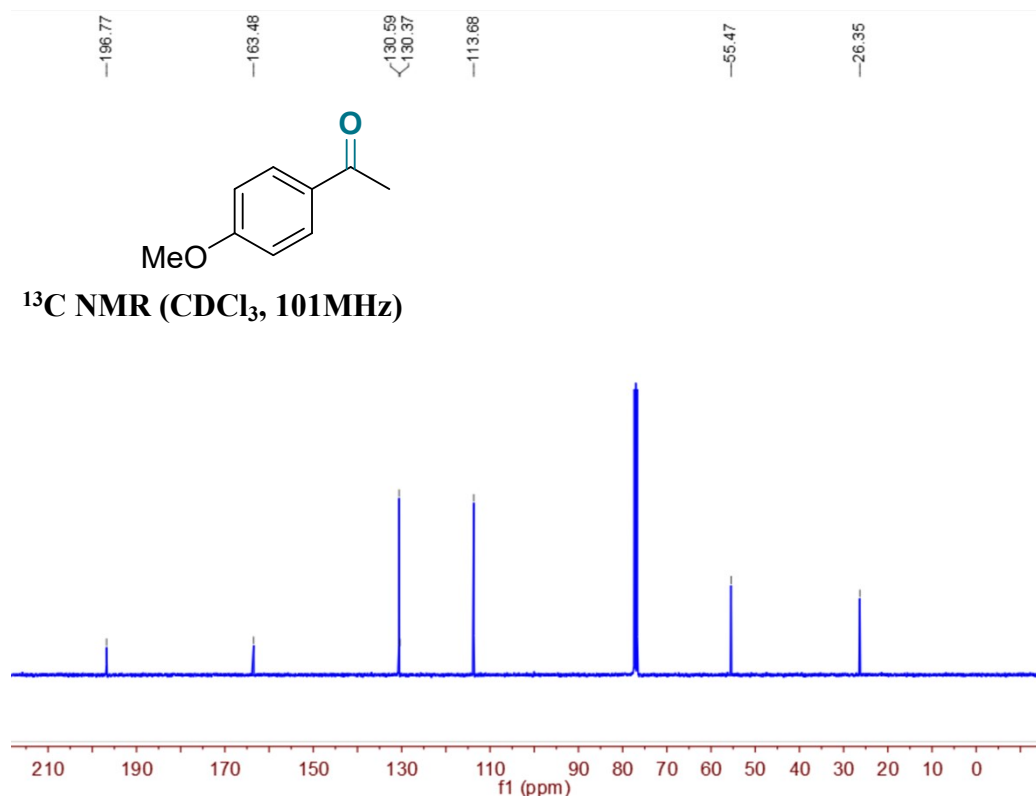

### <sup>13</sup>C NMR Spectrum of Compound 3b

7.89  
7.87

7.29  
7.27

2.60  
2.43

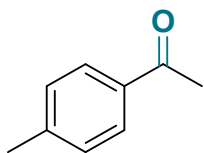

<sup>1</sup>H NMR (CDCl<sub>3</sub>, 400MHz)

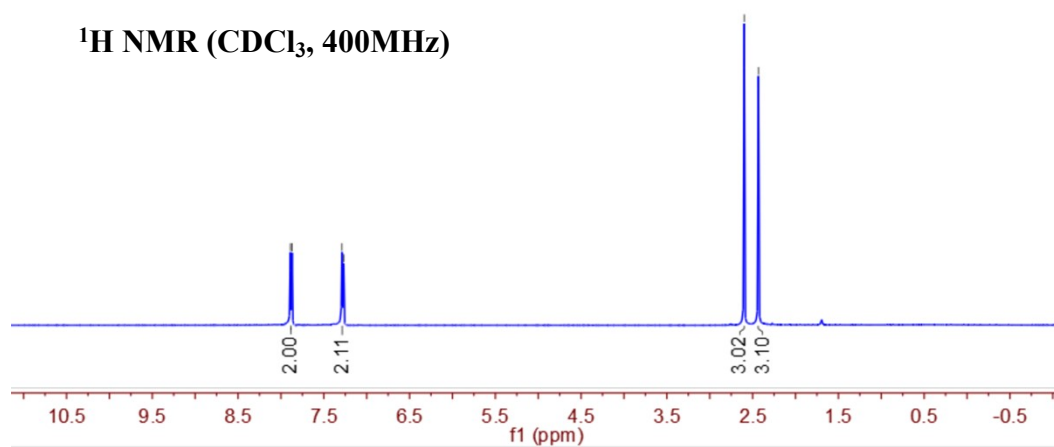

### <sup>1</sup>H NMR Spectrum of Compound 3c

197.83

143.86

134.73

129.24

128.44

26.53

21.63

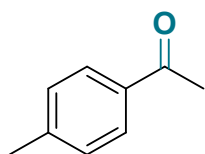

<sup>13</sup>C NMR (CDCl<sub>3</sub>, 101MHz)

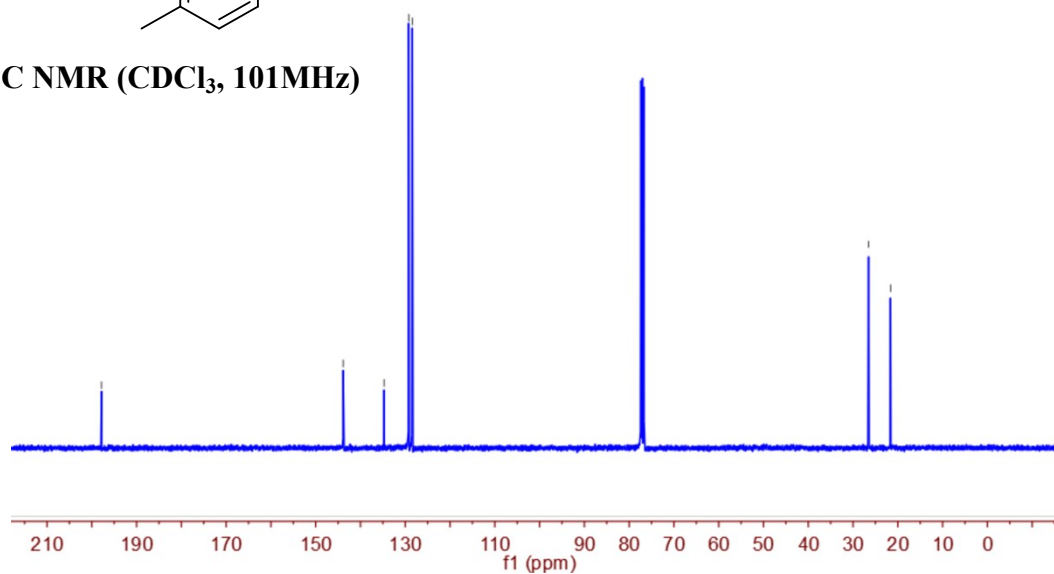

### <sup>13</sup>C NMR Spectrum of Compound 3c

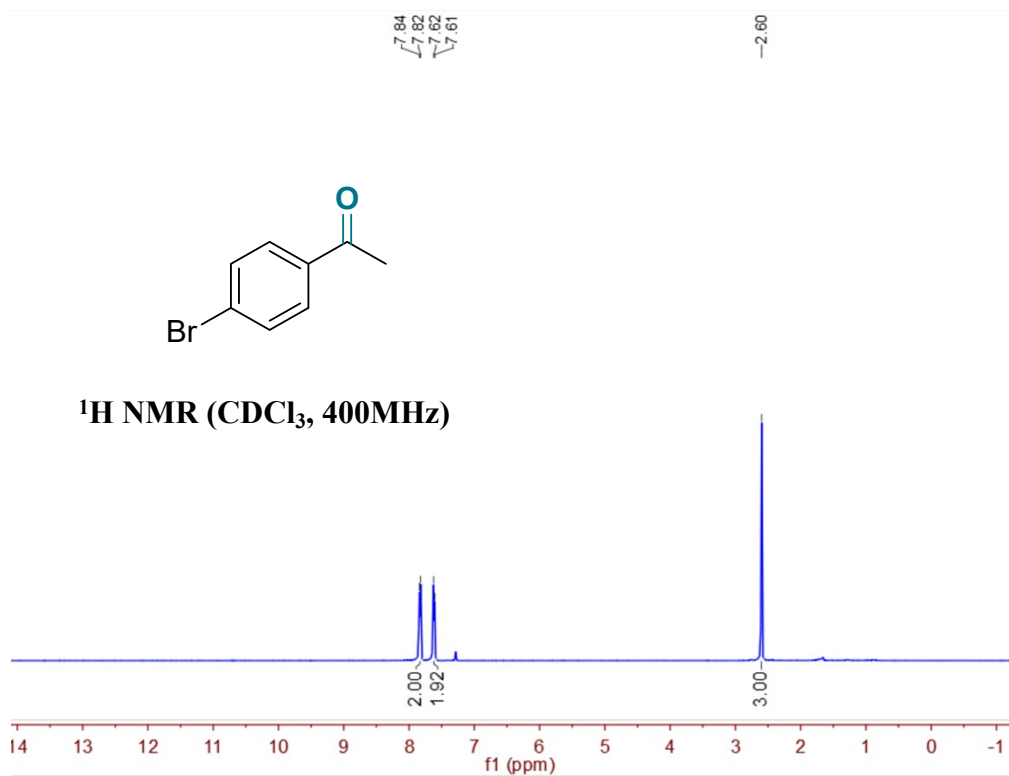

### <sup>1</sup>H NMR Spectrum of Compound 3d

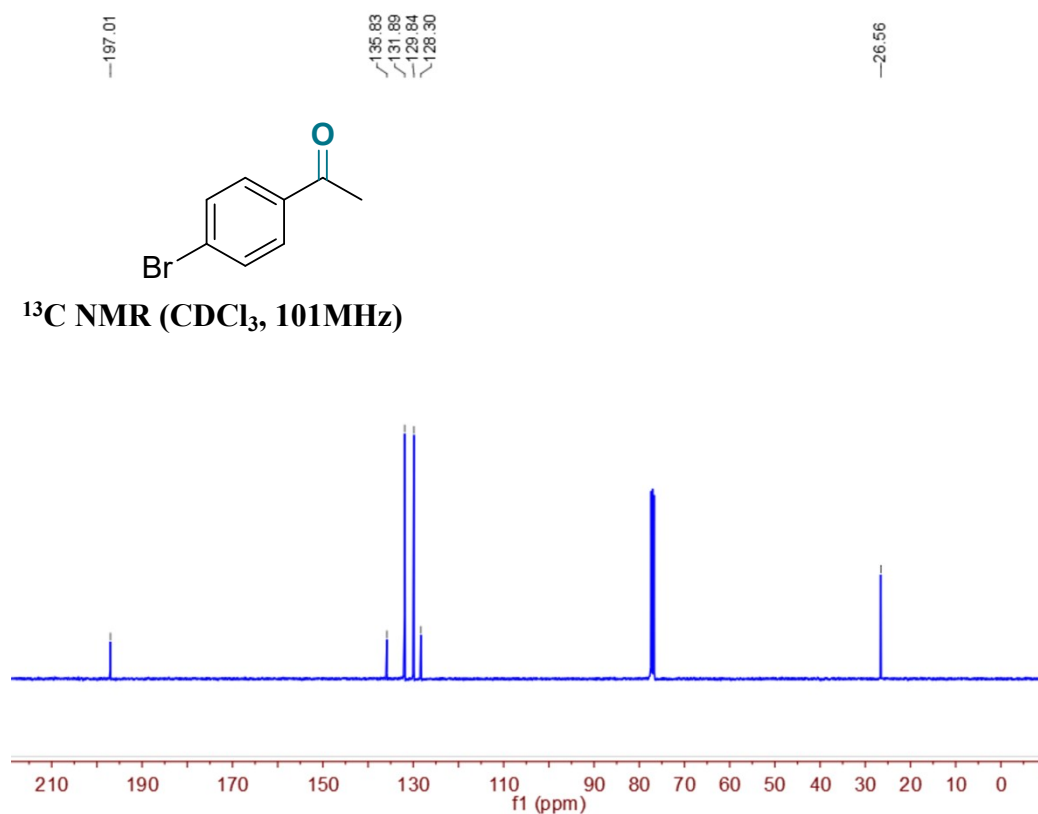

### <sup>13</sup>C NMR Spectrum of Compound 3d

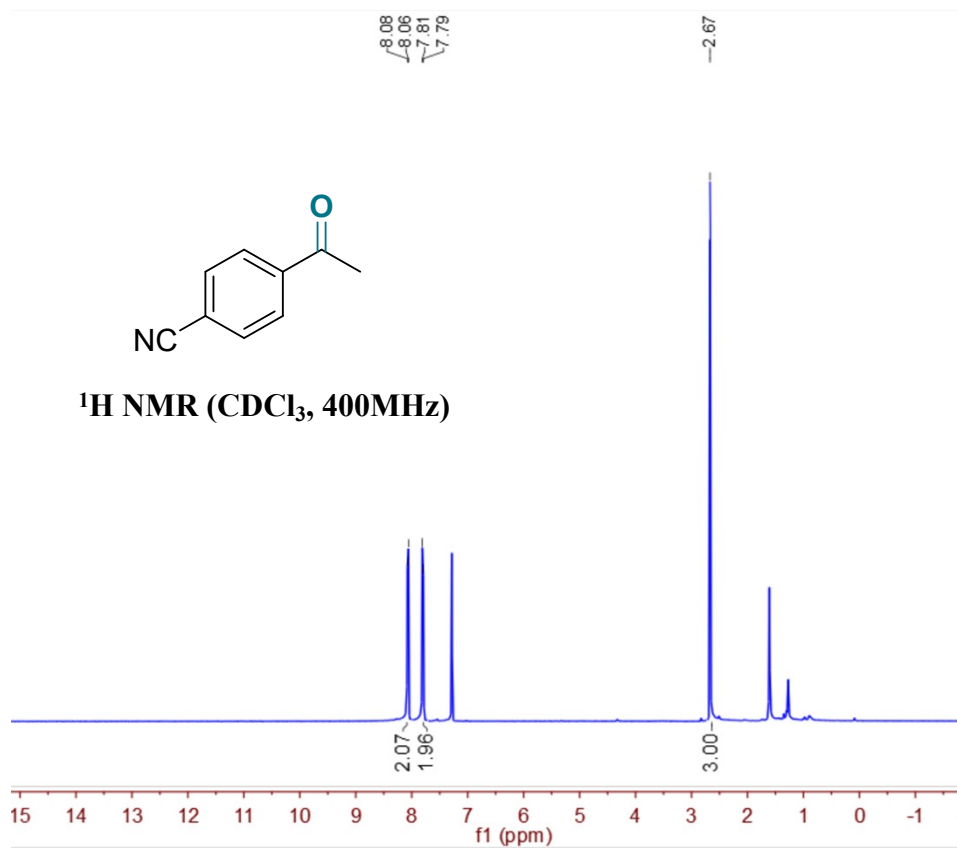

### <sup>1</sup>H NMR Spectrum of Compound 3e

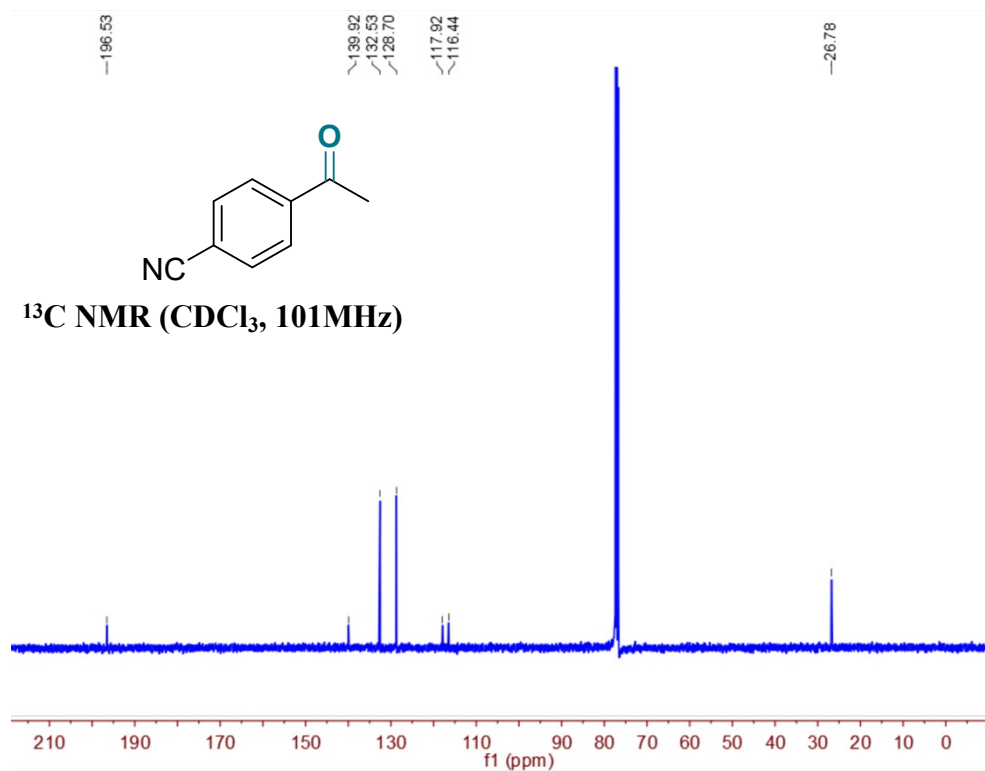



### <sup>13</sup>C NMR Spectrum of Compound 3e

8.34  
8.32  
8.14  
8.12  
-2.70

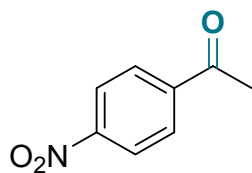

<sup>1</sup>H NMR (CDCl<sub>3</sub>, 400MHz)

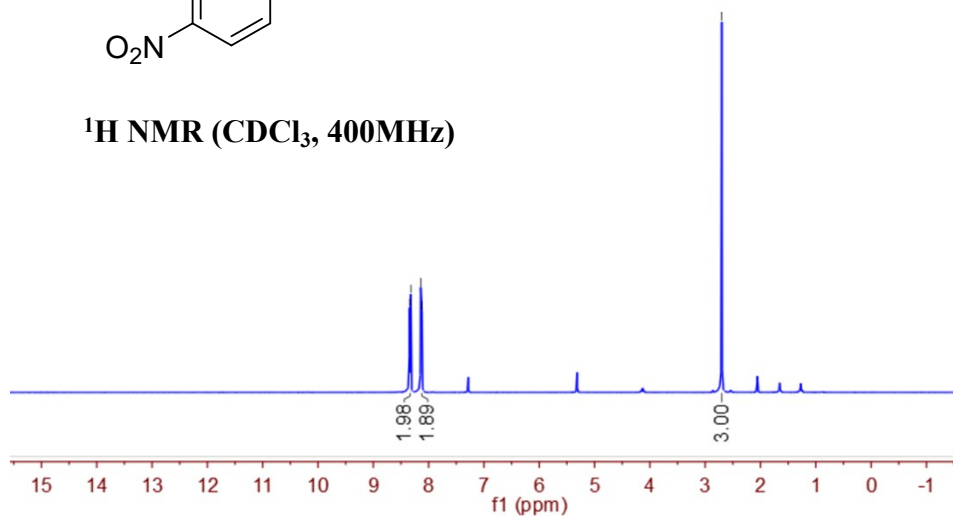

### <sup>1</sup>H NMR Spectrum of Compound 3f

196.30  
150.37  
141.38  
129.31  
123.86  
26.99

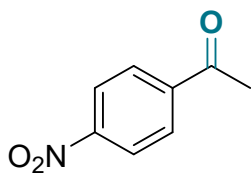

<sup>13</sup>C NMR (CDCl<sub>3</sub>, 101MHz)

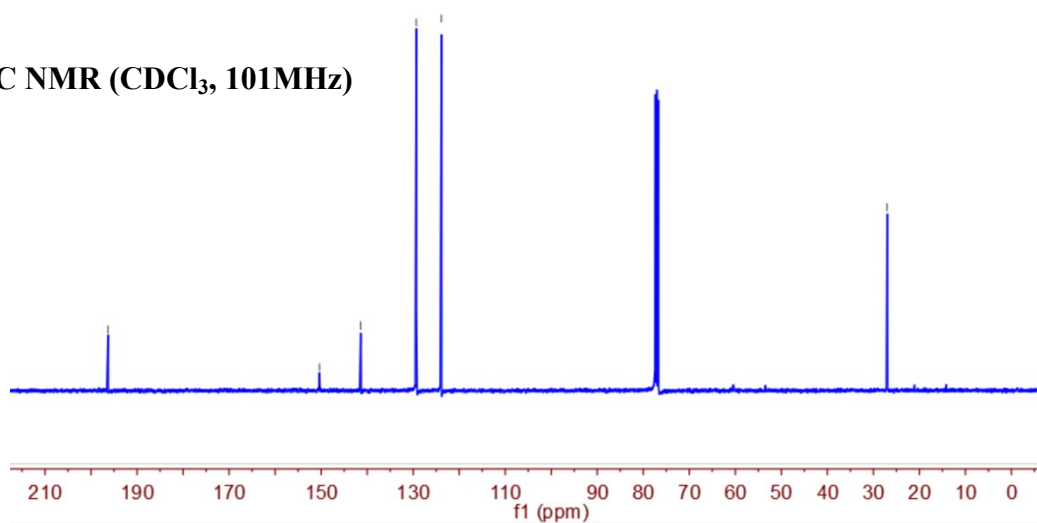

### <sup>13</sup>C NMR Spectrum of Compound 3f

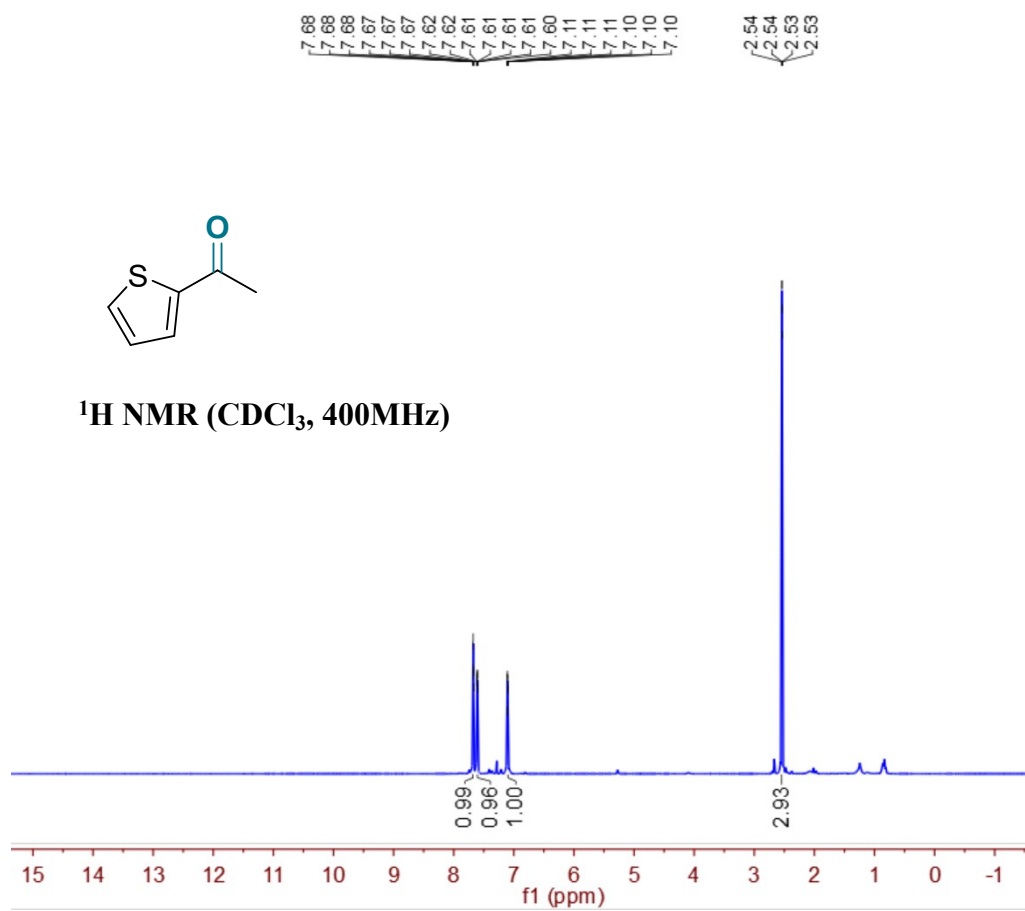

**$^1\text{H}$  NMR Spectrum of Compound 3g**

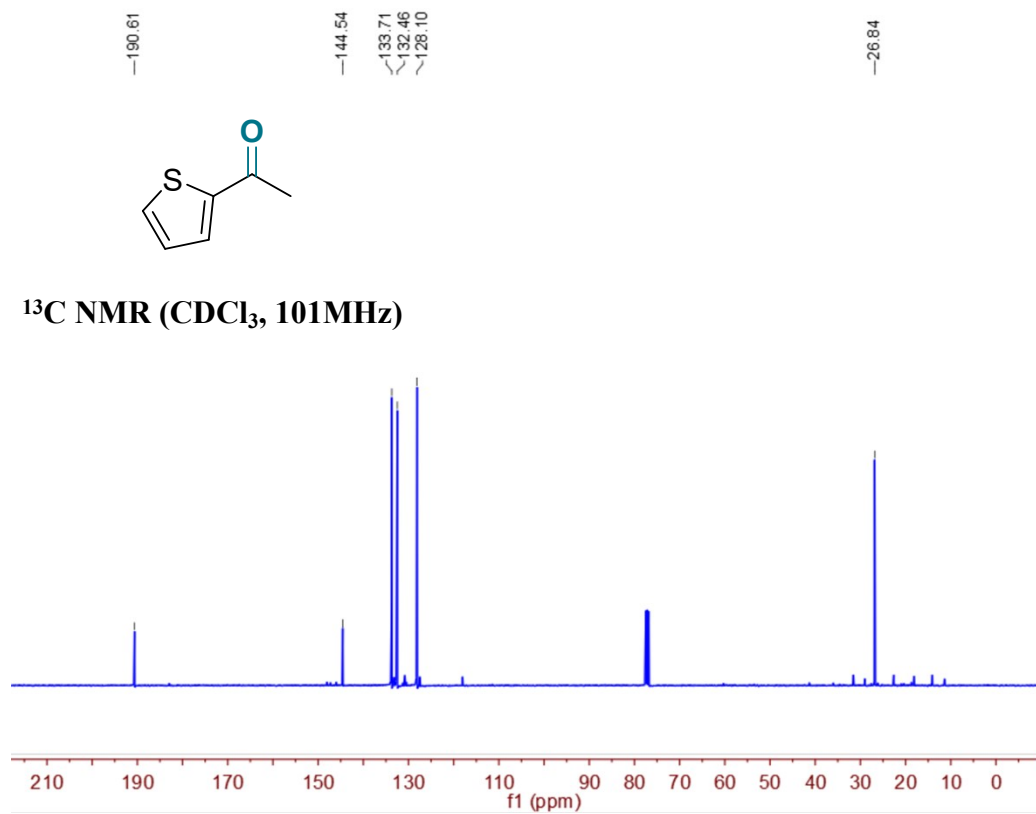

### <sup>13</sup>C NMR Spectrum of Compound 3g

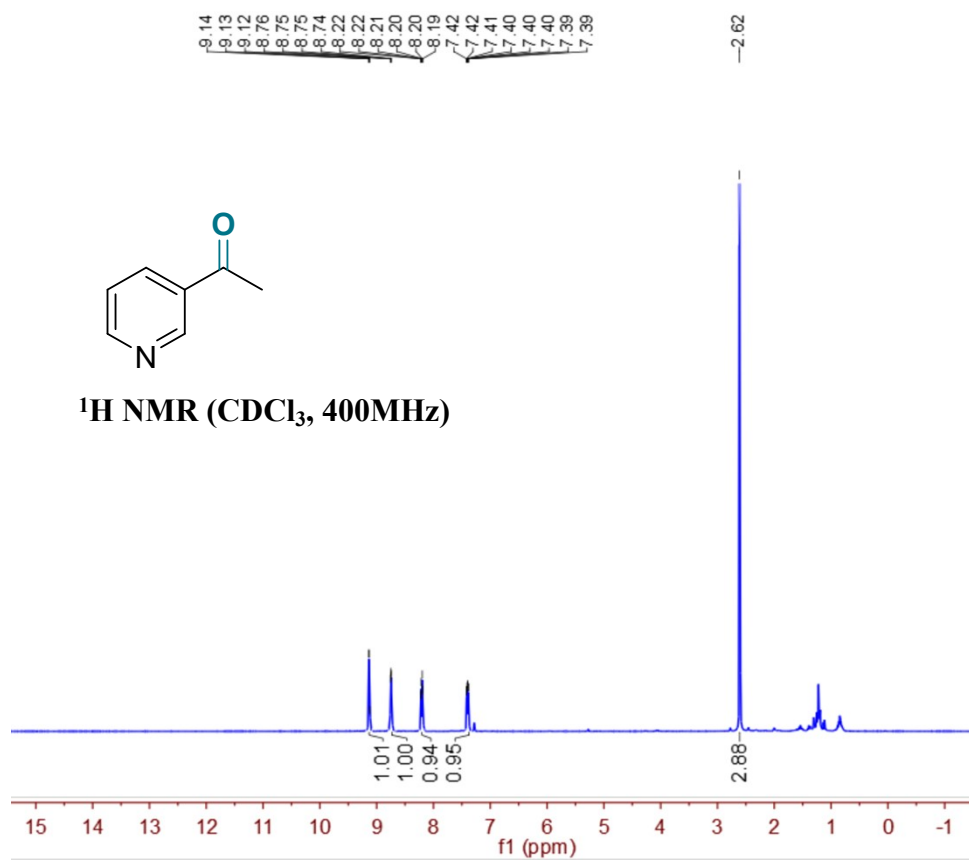

### <sup>13</sup>C NMR Spectrum of Compound 3h

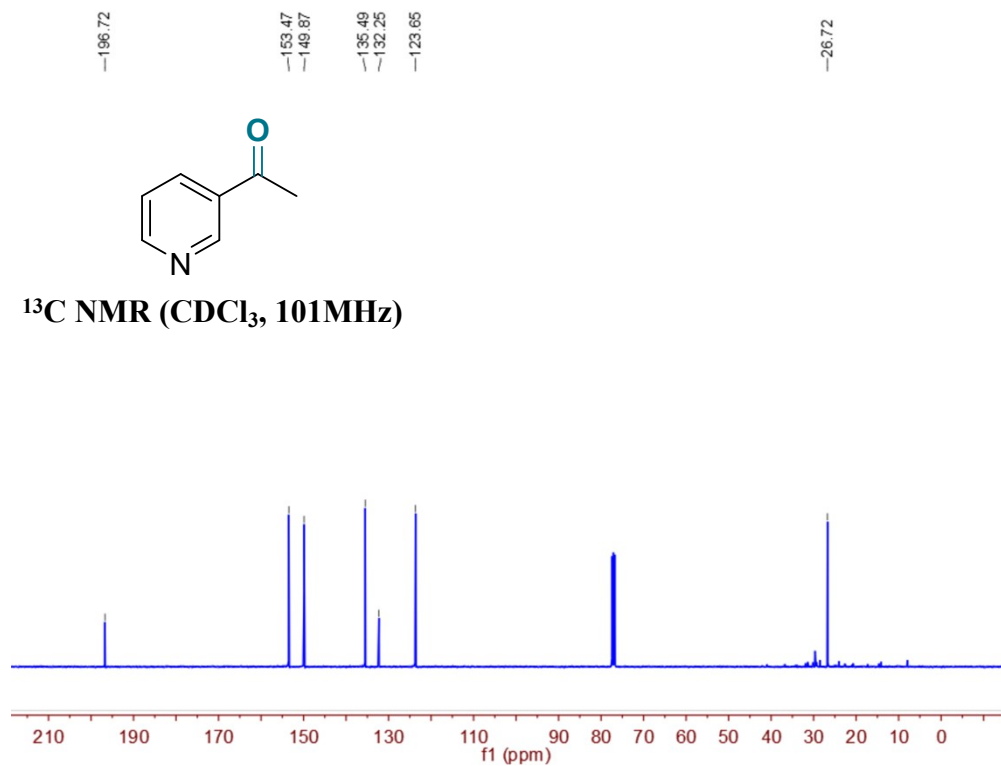

### <sup>13</sup>C NMR Spectrum of Compound 3h

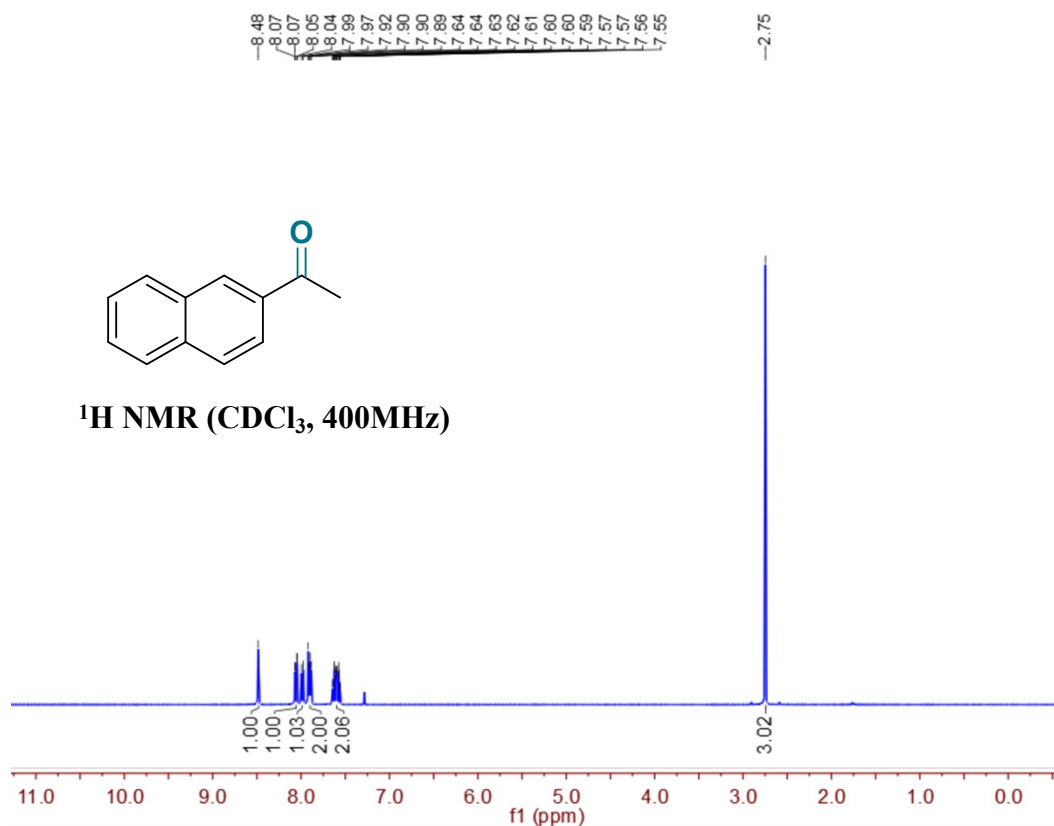

### <sup>1</sup>H NMR Spectrum of Compound 3i

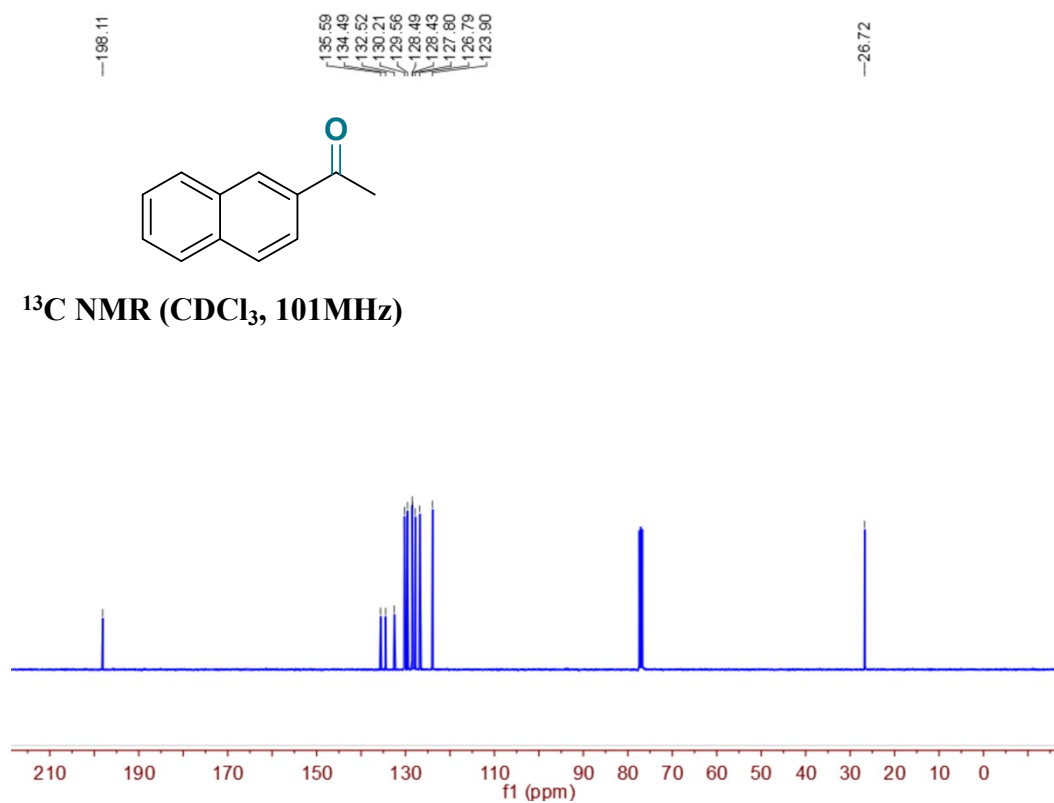

### <sup>13</sup>C NMR Spectrum of Compound 3i

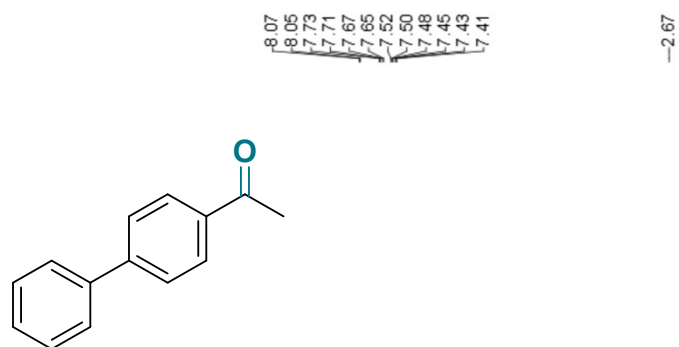

### <sup>1</sup>H NMR (CDCl<sub>3</sub>, 400MHz)

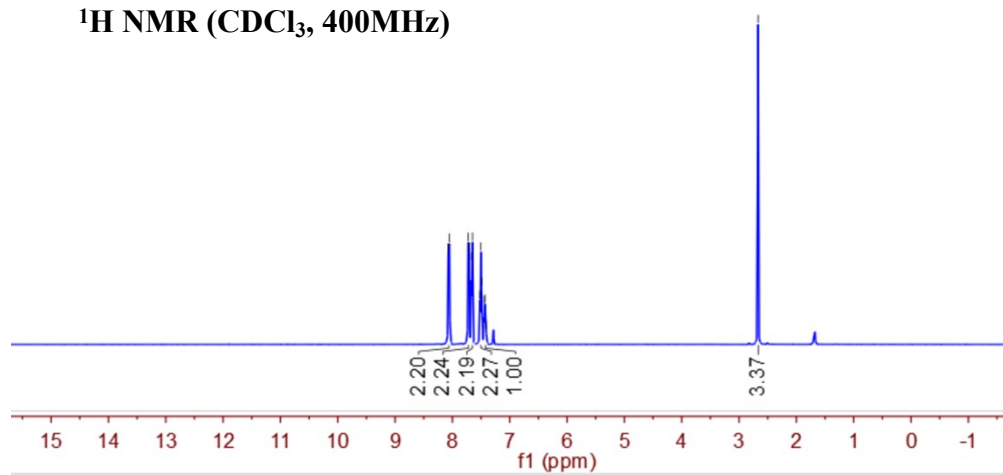

### <sup>1</sup>H NMR Spectrum of Compound 3j

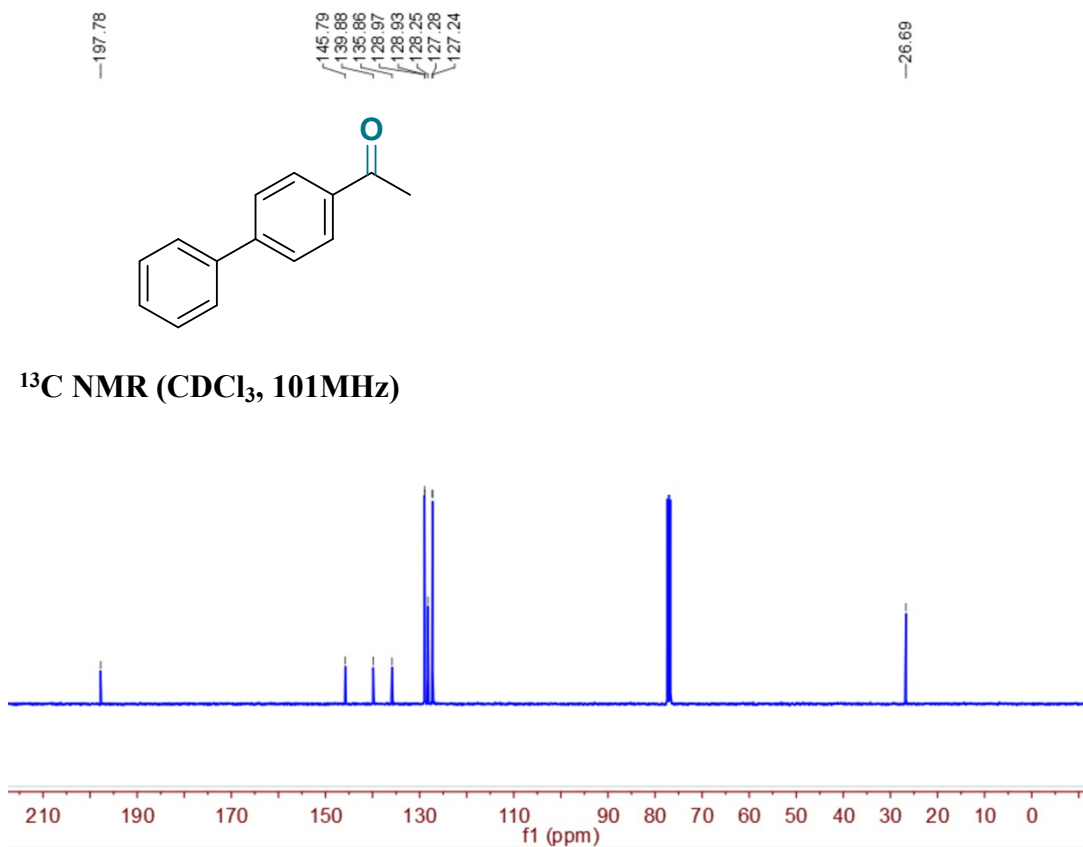

<sup>13</sup>C NMR Spectrum of Compound 3j

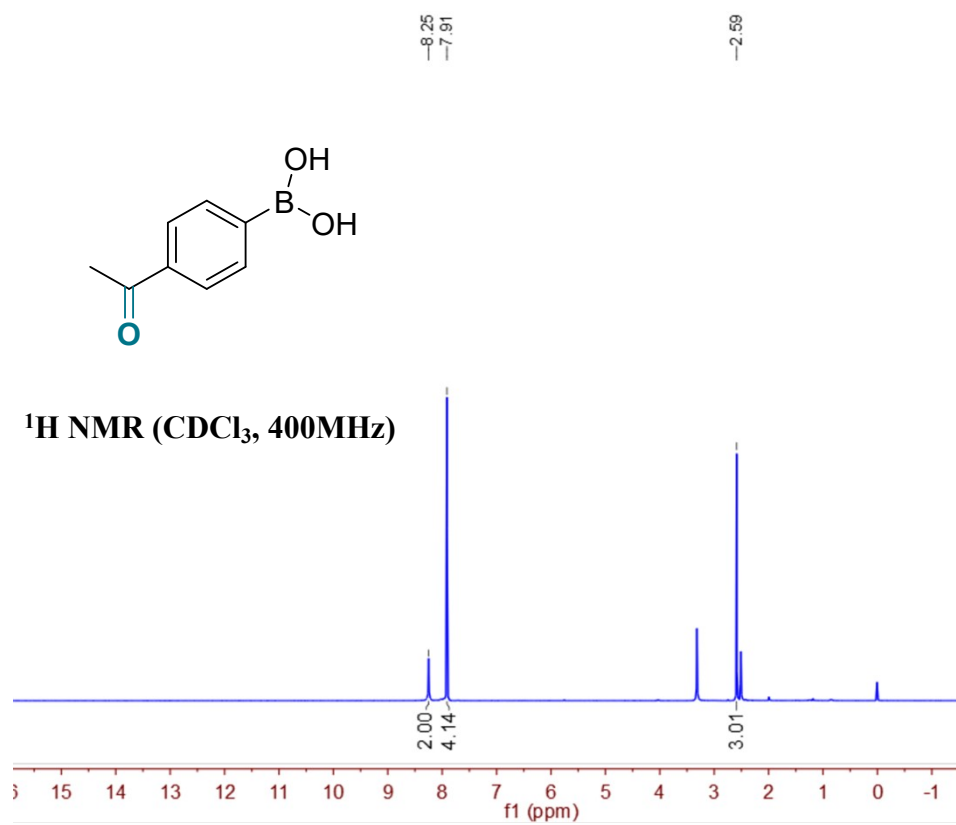

### <sup>1</sup>H NMR Spectrum of Compound 3k

Chemical shift values (ppm): -198.71, 138.28, 134.70, 127.41, -27.28

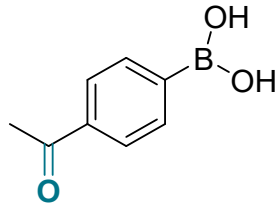

### <sup>13</sup>C NMR (CDCl<sub>3</sub>, 101MHz)

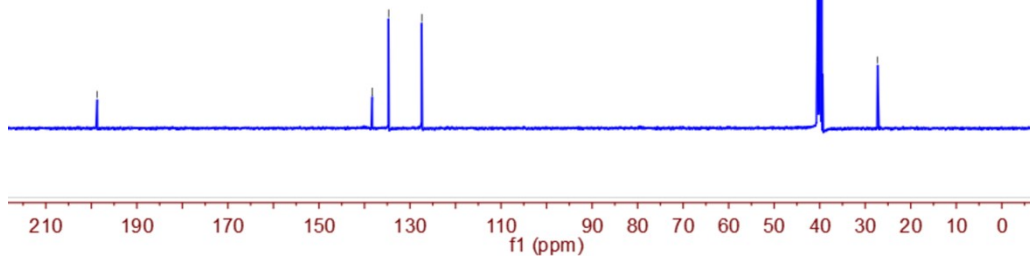

### <sup>13</sup>C NMR Spectrum of Compound 3k

7.84  
7.84  
7.83  
7.82  
7.63  
7.61  
7.60  
7.59  
7.53  
7.51  
7.49

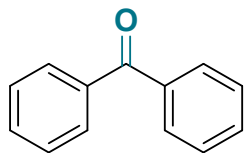

<sup>1</sup>H NMR (CDCl<sub>3</sub>, 400MHz)

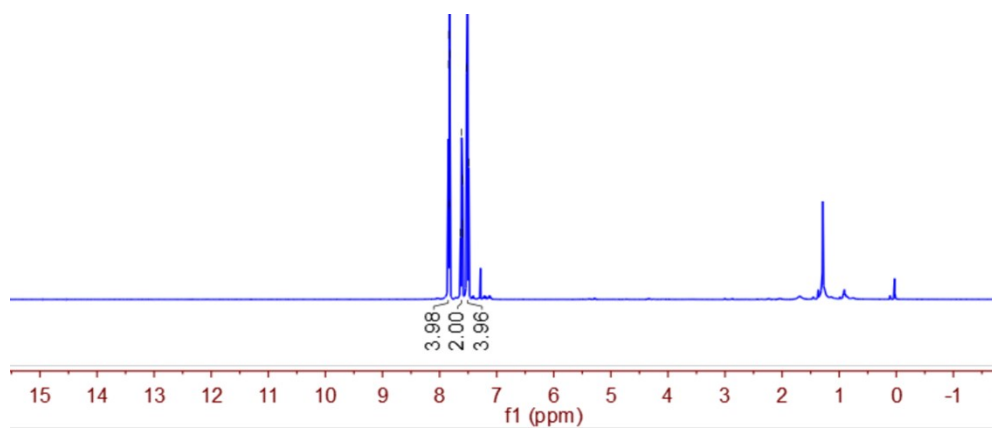

<sup>1</sup>H NMR Spectrum of Compound 31

196.70  
137.64  
132.39  
130.04  
128.27

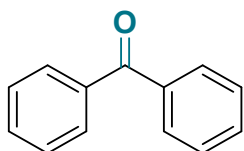

<sup>13</sup>C NMR (CDCl<sub>3</sub>, 101MHz)

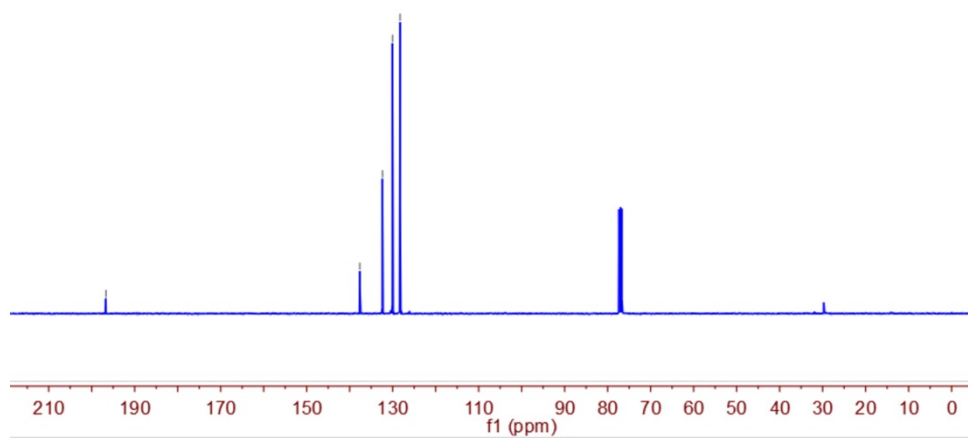

<sup>13</sup>C NMR Spectrum of Compound 31



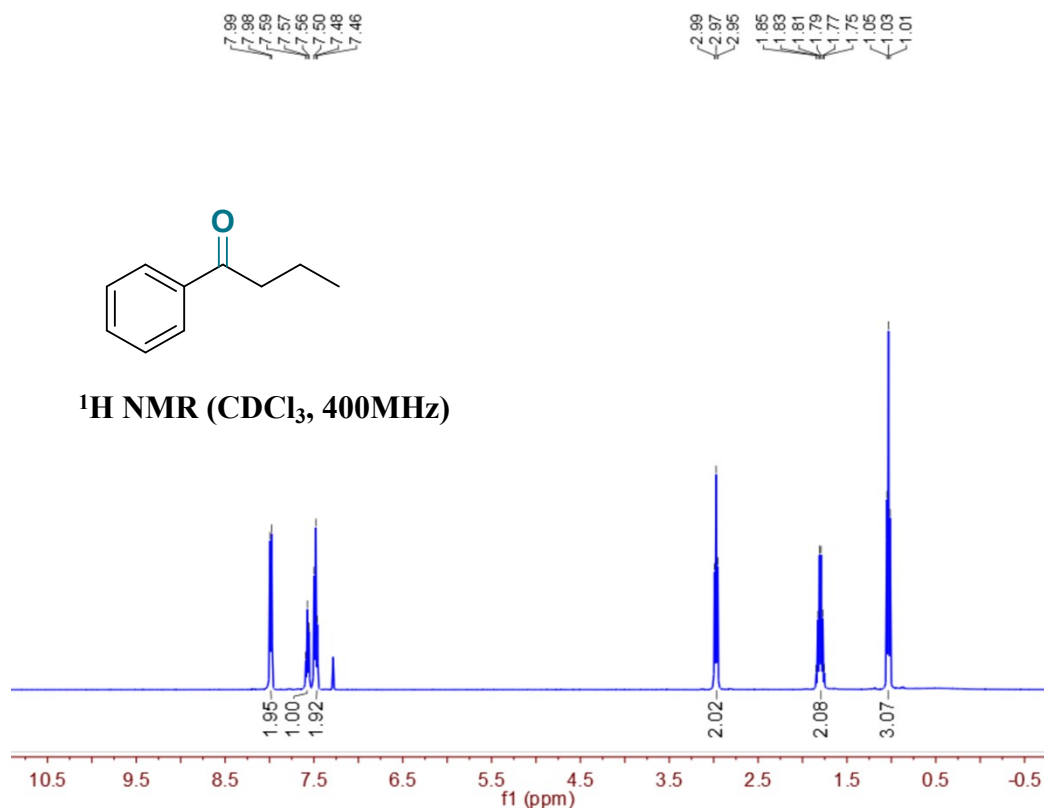

<sup>1</sup>H NMR Spectrum of Compound 3m

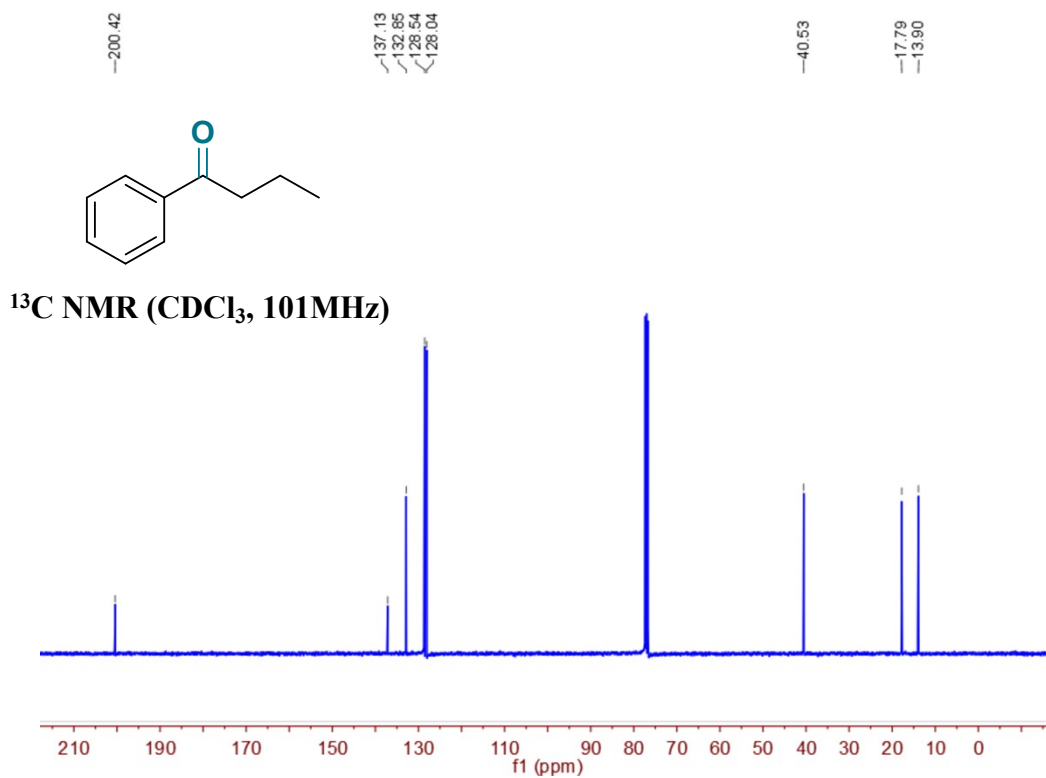

<sup>13</sup>C NMR Spectrum of Compound 3m

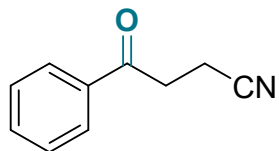

**$^1\text{H}$  NMR (CDCl<sub>3</sub>, 400MHz)**

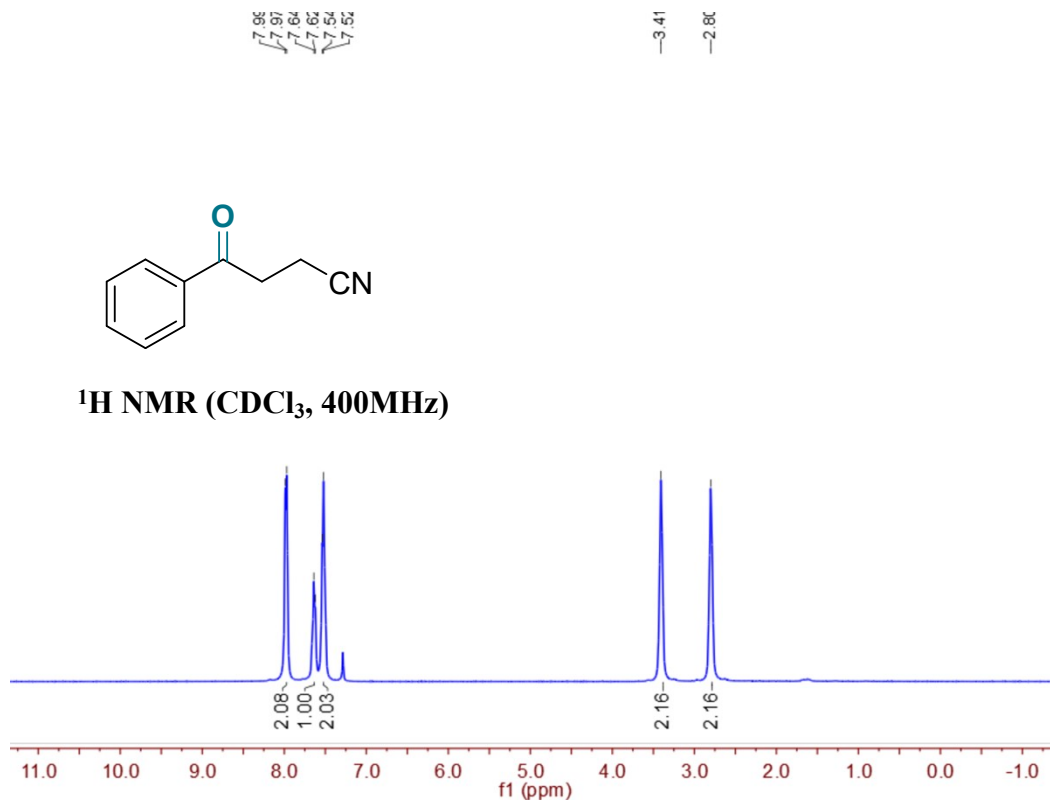

**$^1\text{H}$  NMR Spectrum of Compound 3n**

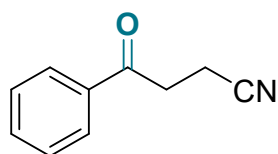

**$^{13}\text{C}$  NMR (CDCl<sub>3</sub>, 101MHz)**

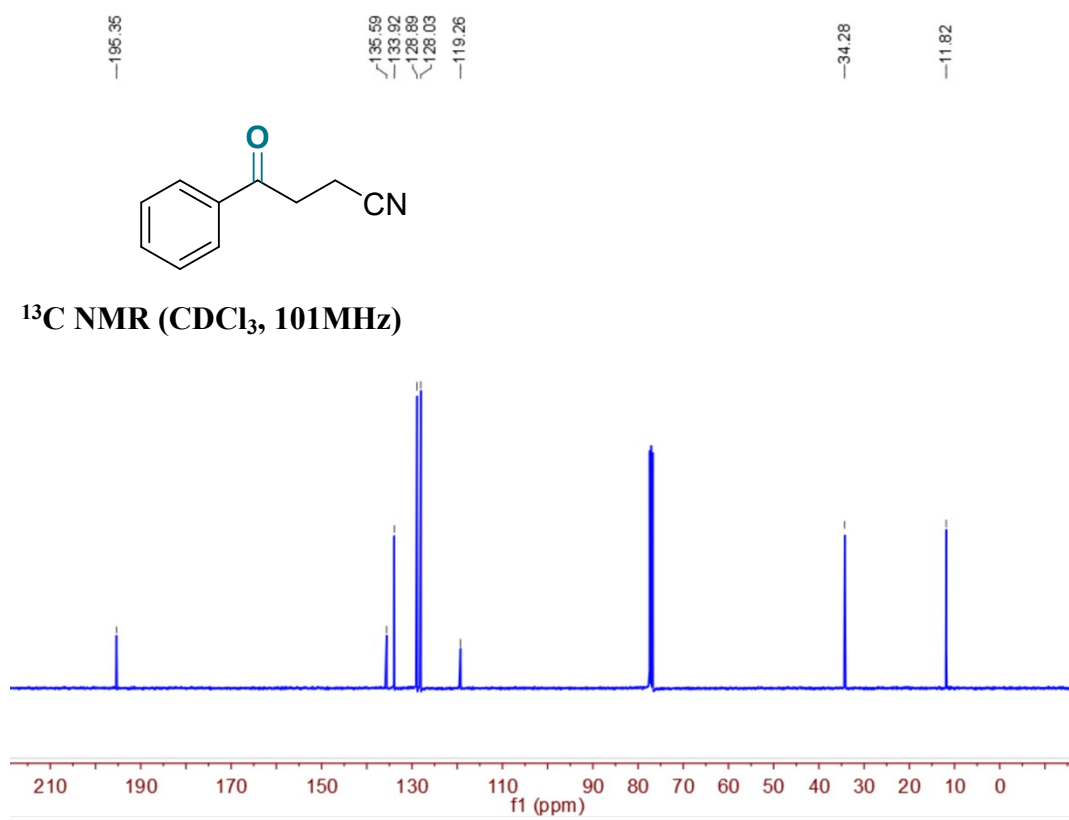

**$^{13}\text{C}$  NMR Spectrum of Compound 3n**

8.01  
7.99  
7.99  
7.61  
7.61  
7.60  
7.59  
7.59  
7.58  
7.57  
7.57  
7.51  
7.49  
7.47  
7.47  
7.36  
7.35  
7.33  
7.31  
7.29  
7.27  
7.25  
7.23  
3.36  
3.34  
3.34  
3.32  
3.14  
3.12  
3.10

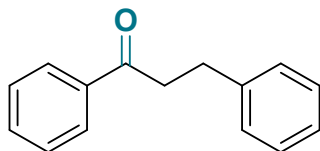

**<sup>1</sup>H NMR (CDCl<sub>3</sub>, 400MHz)**

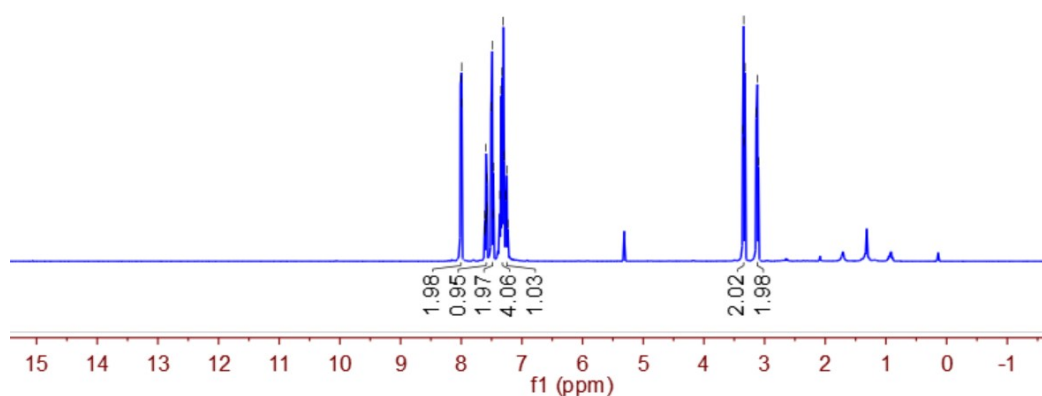

**<sup>1</sup>H NMR Spectrum of Compound 30**

-199.18

141.32  
136.96  
133.03  
128.61  
128.54  
128.44  
128.06  
126.15

-40.43

-30.19

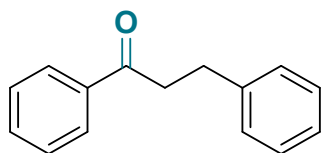

**<sup>13</sup>C NMR (CDCl<sub>3</sub>, 101MHz)**

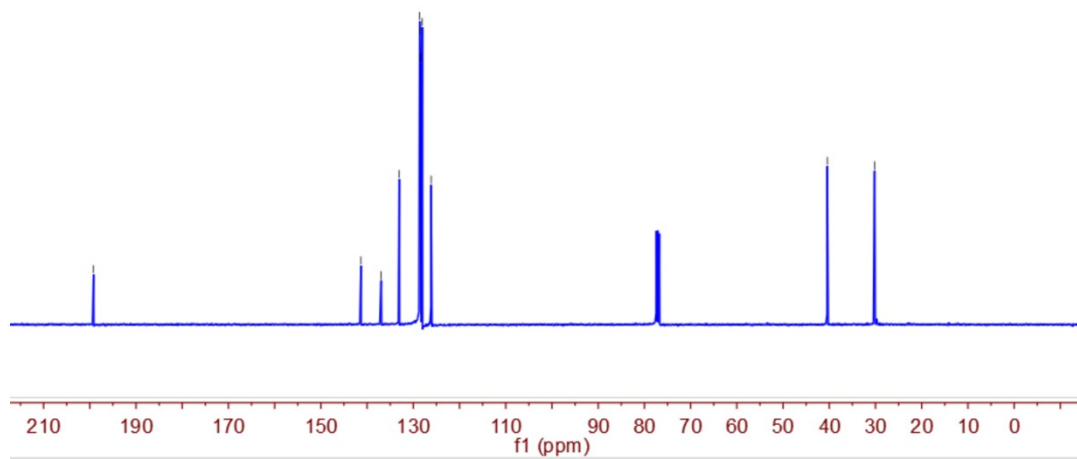

**<sup>13</sup>C NMR Spectrum of Compound 30**

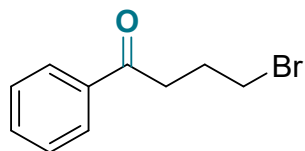

**<sup>1</sup>H NMR (CDCl<sub>3</sub>, 400MHz)**

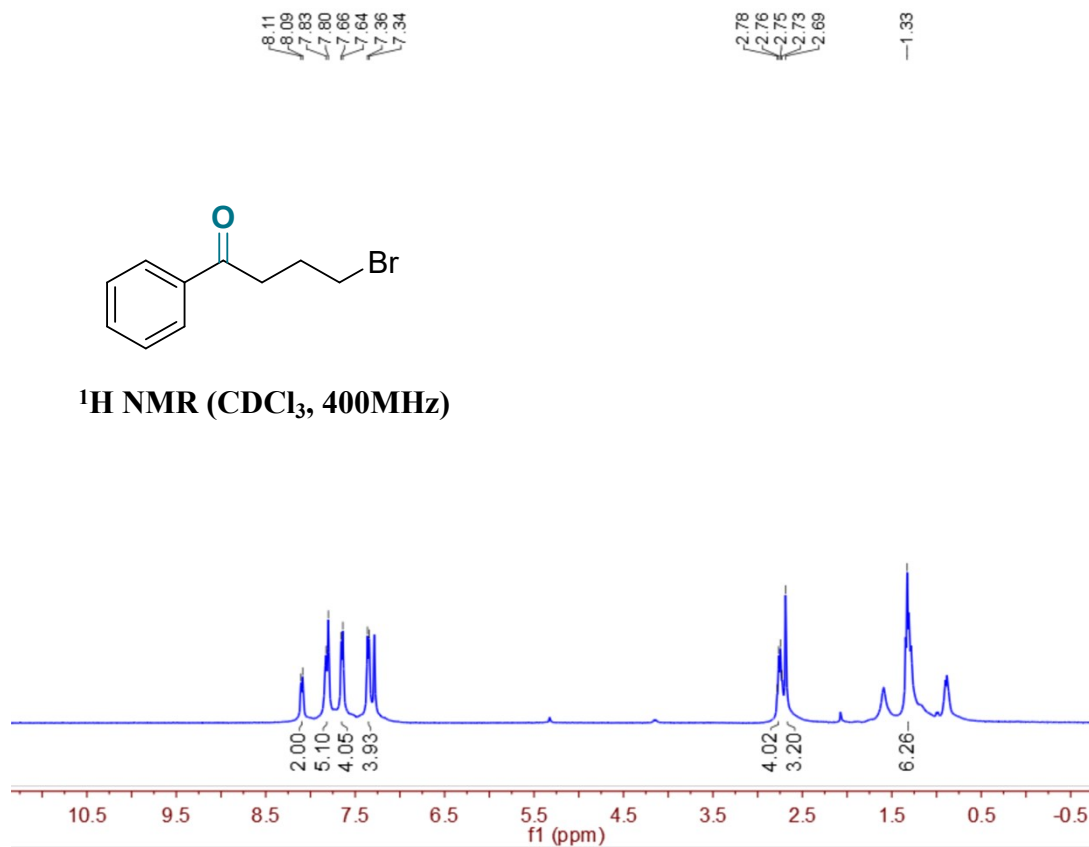

**<sup>1</sup>H NMR Spectrum of Compound 3p**

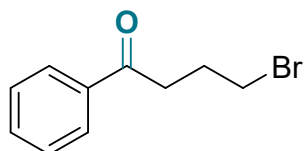

**<sup>13</sup>C NMR (CDCl<sub>3</sub>, 101MHz)**

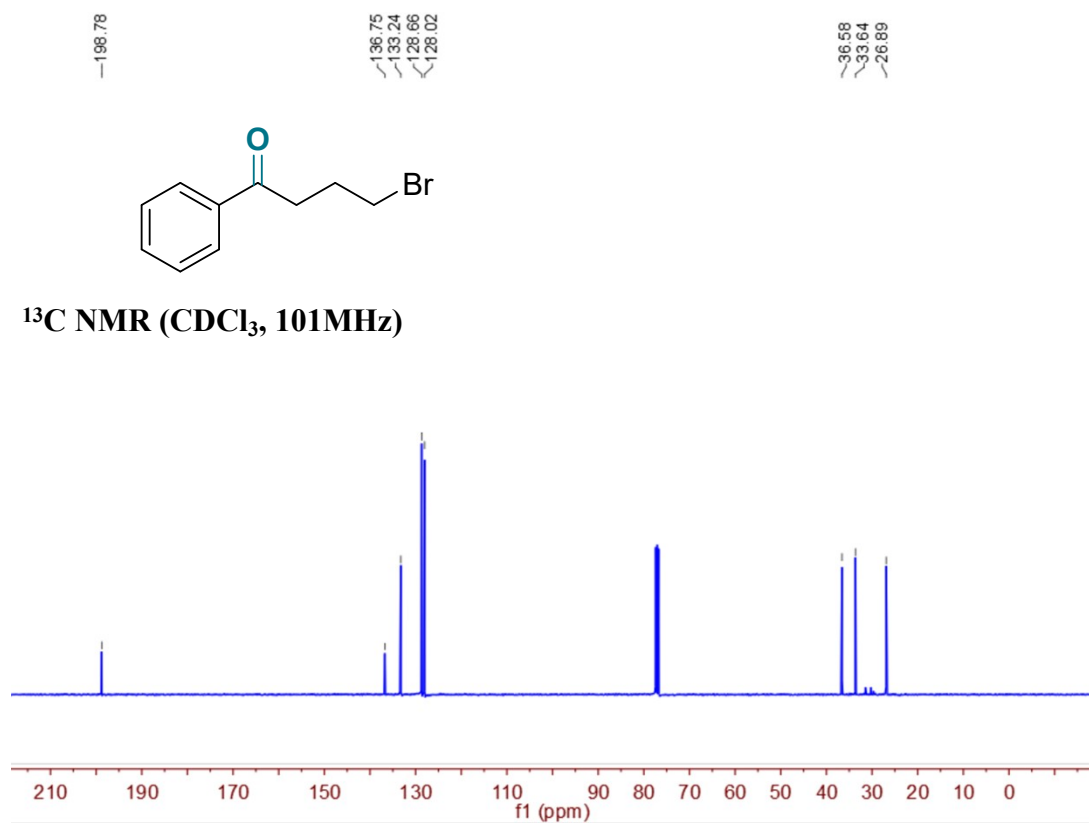

**<sup>13</sup>C NMR Spectrum of Compound 3p**

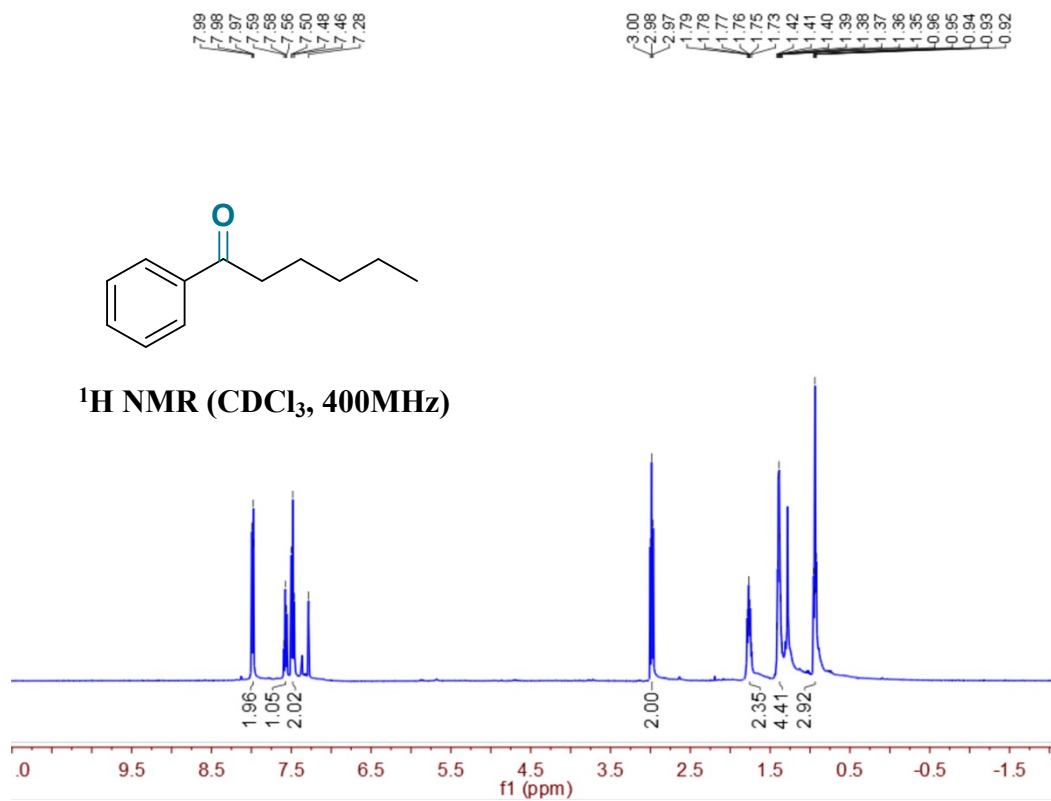

<sup>1</sup>H NMR Spectrum of Compound 3q

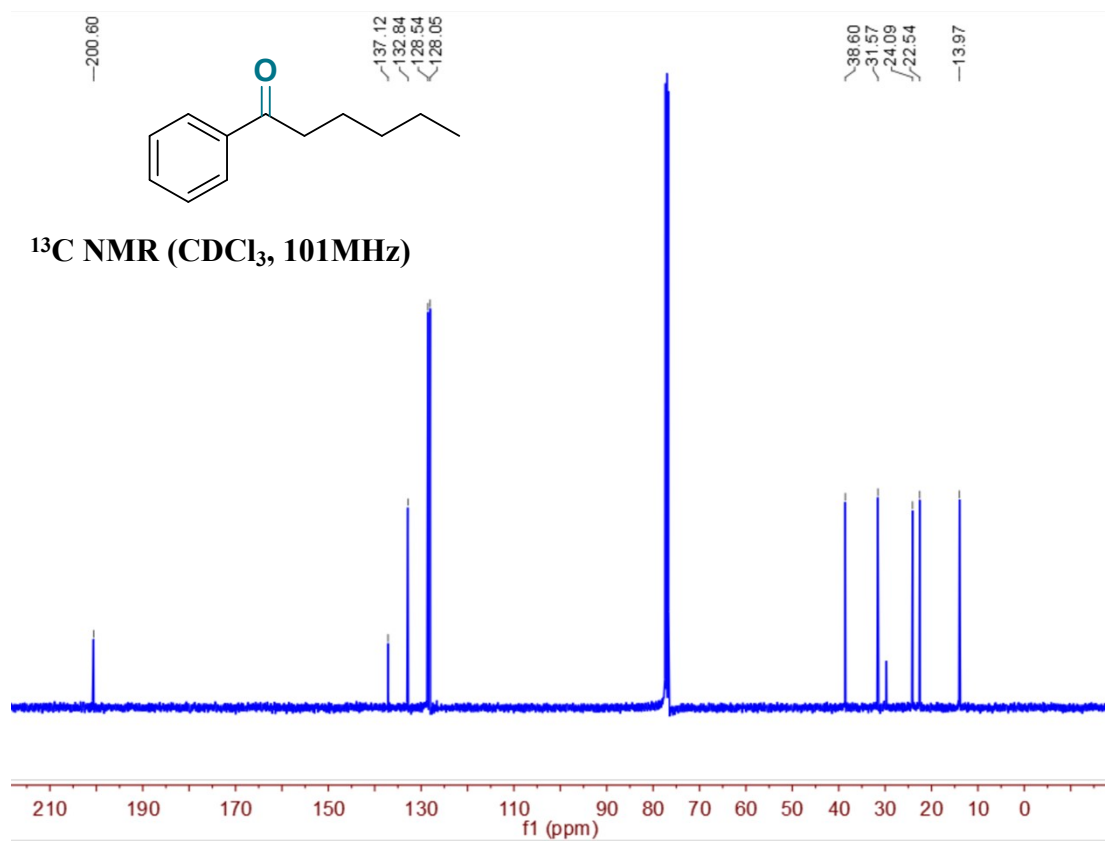

### <sup>13</sup>C NMR Spectrum of Compound 3q

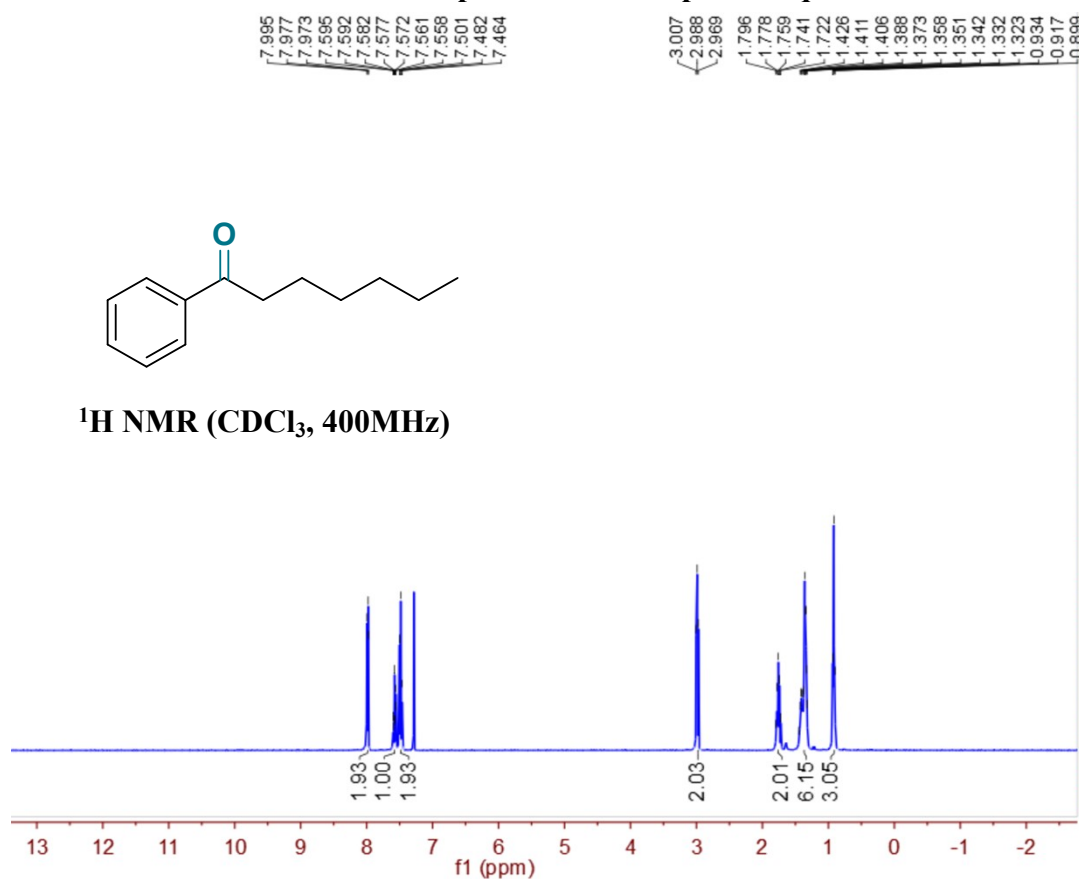

### <sup>13</sup>C NMR Spectrum of Compound 3r

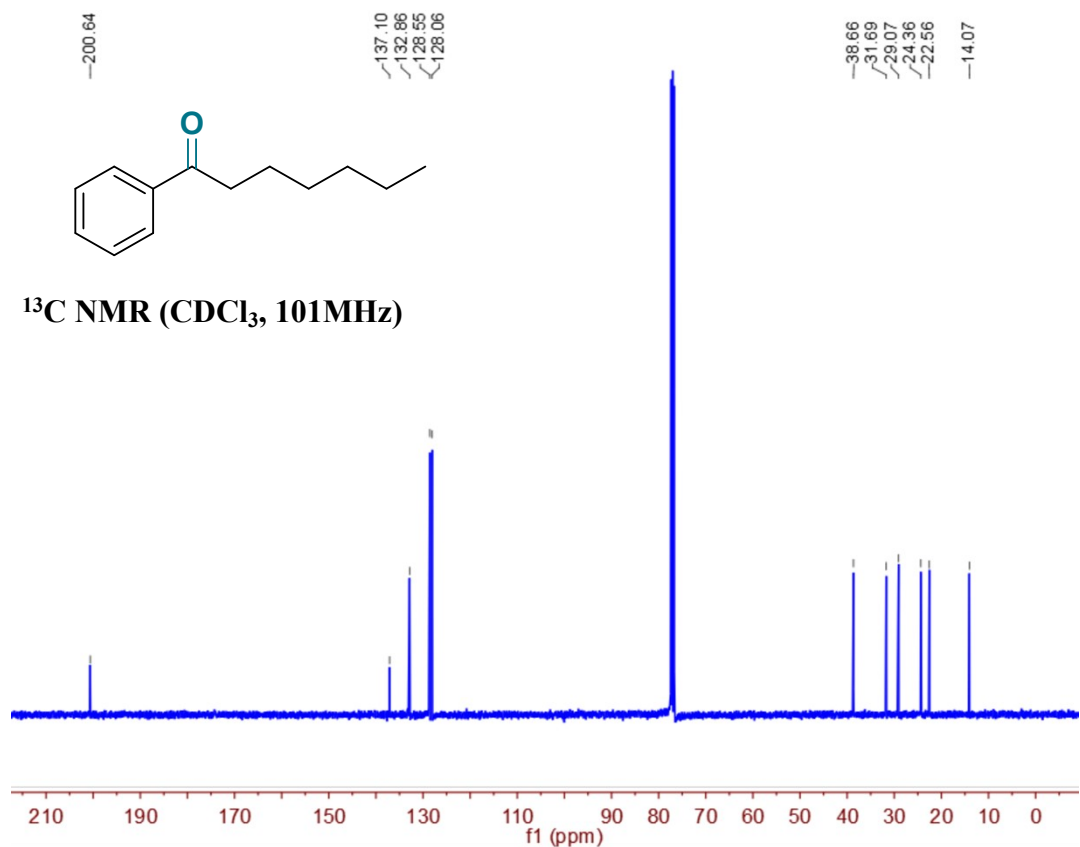

### <sup>13</sup>C NMR Spectrum of Compound 3r

8.072  
8.052  
7.514  
7.511  
7.496  
7.492  
7.477  
7.473  
7.351  
7.332  
7.313  
7.269  
3.012  
2.997  
2.981  
2.703  
2.687  
2.670  
2.201  
2.185  
2.170  
2.153  
2.138

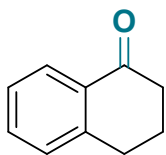

<sup>1</sup>H NMR (CDCl<sub>3</sub>, 400MHz)

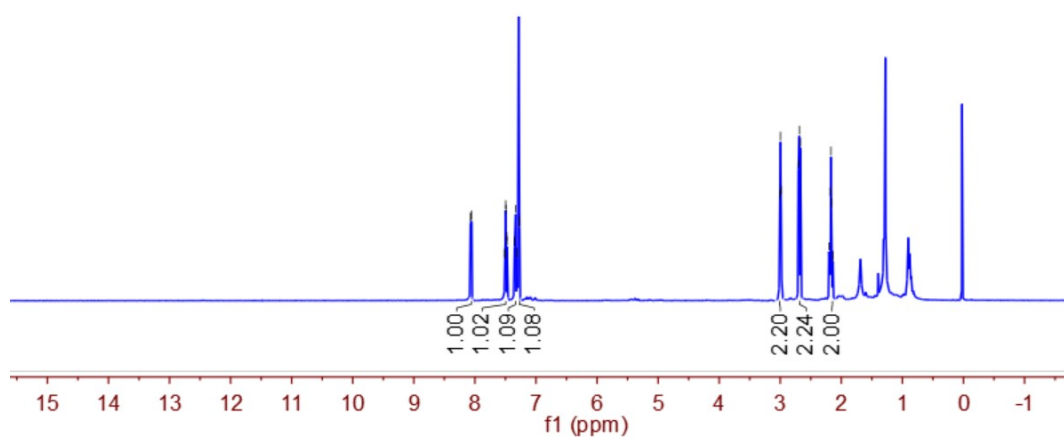

### <sup>1</sup>H NMR Spectrum of Compound 3s

198.34  
144.47  
133.37  
132.65  
128.75  
127.19  
126.63  
39.18  
29.72  
23.30

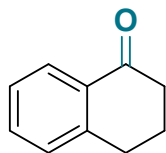

<sup>13</sup>C NMR (CDCl<sub>3</sub>, 101MHz)

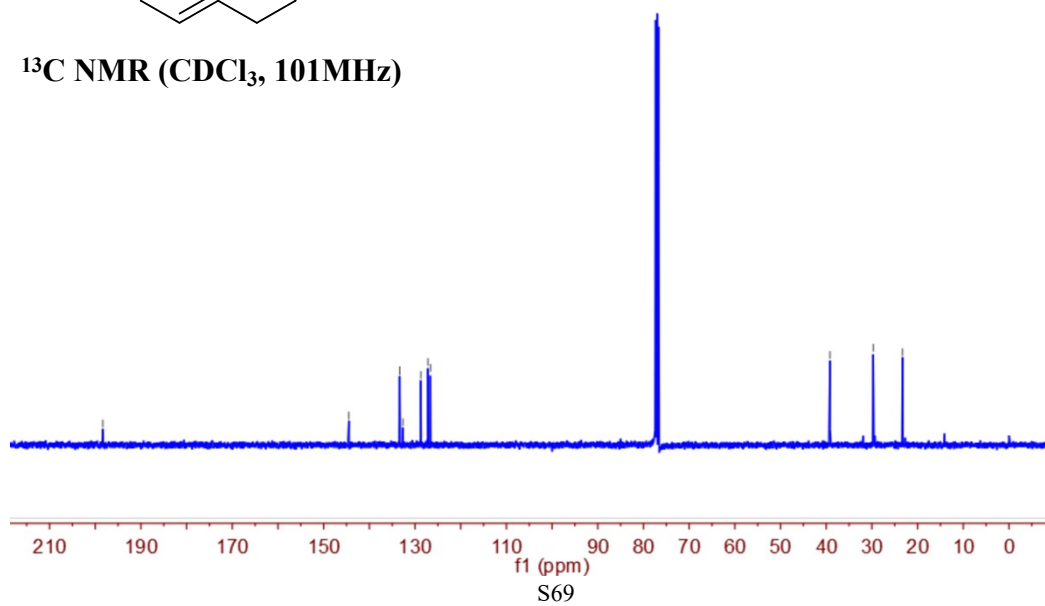

### <sup>13</sup>C NMR Spectrum of Compound 3s

8.11  
8.09  
7.57  
7.55  
7.53  
7.43  
7.39  
7.29  
7.27  
4.56  
4.53  
3.08  
3.06

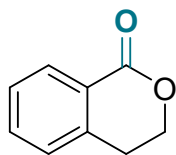

<sup>1</sup>H NMR (CDCl<sub>3</sub>, 400MHz)

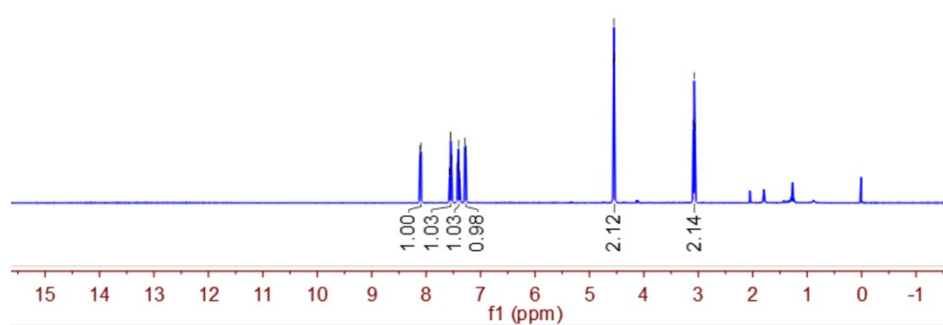

### <sup>1</sup>H NMR Spectrum of Compound 3t

165.06  
139.59  
133.65  
130.30  
127.63  
127.26  
125.31  
67.31  
27.81

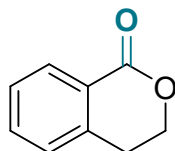

<sup>13</sup>C NMR (CDCl<sub>3</sub>, 101MHz)

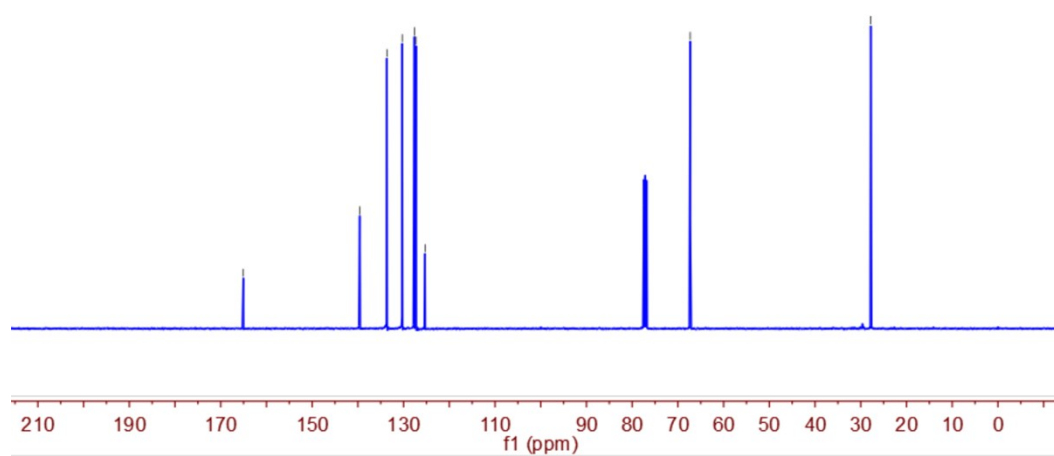

### <sup>13</sup>C NMR Spectrum of Compound 3t



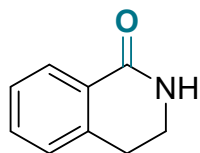

<sup>1</sup>H NMR (CDCl<sub>3</sub>, 400MHz)

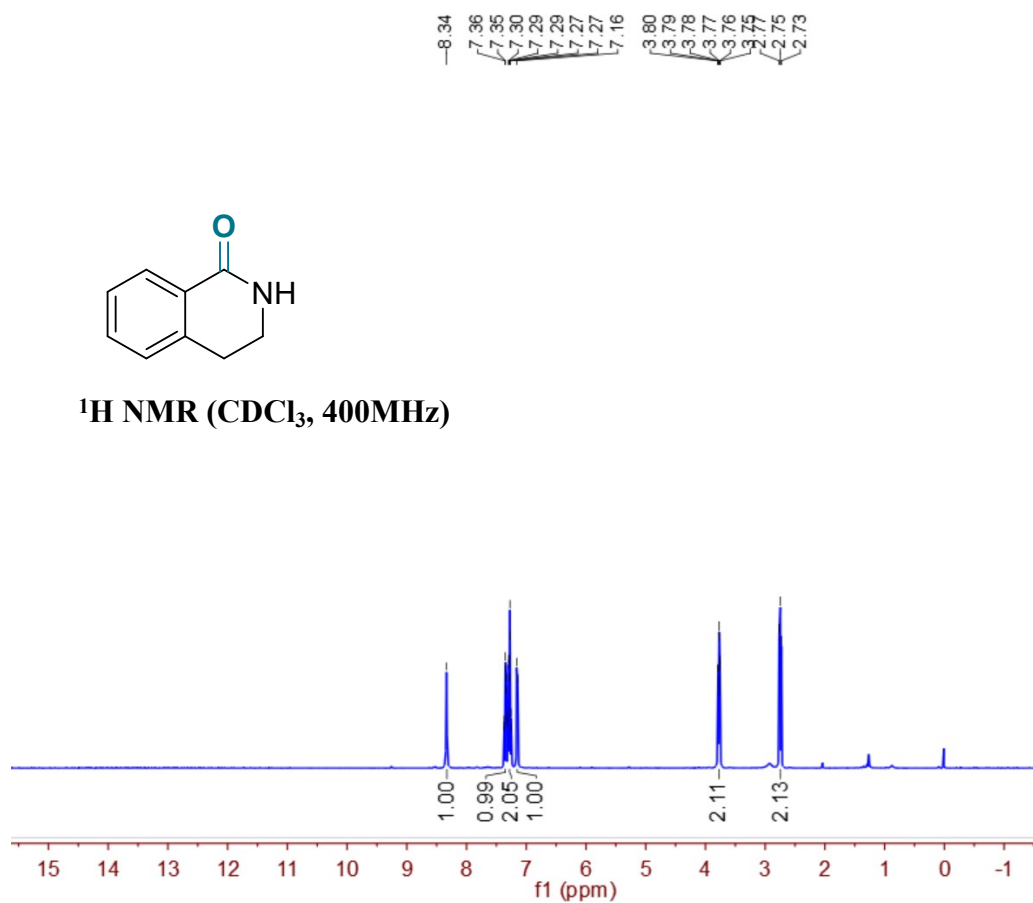

<sup>1</sup>H NMR Spectrum of Compound 3u

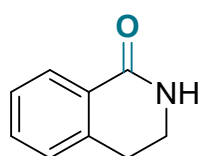

<sup>13</sup>C NMR (CDCl<sub>3</sub>, 101MHz)

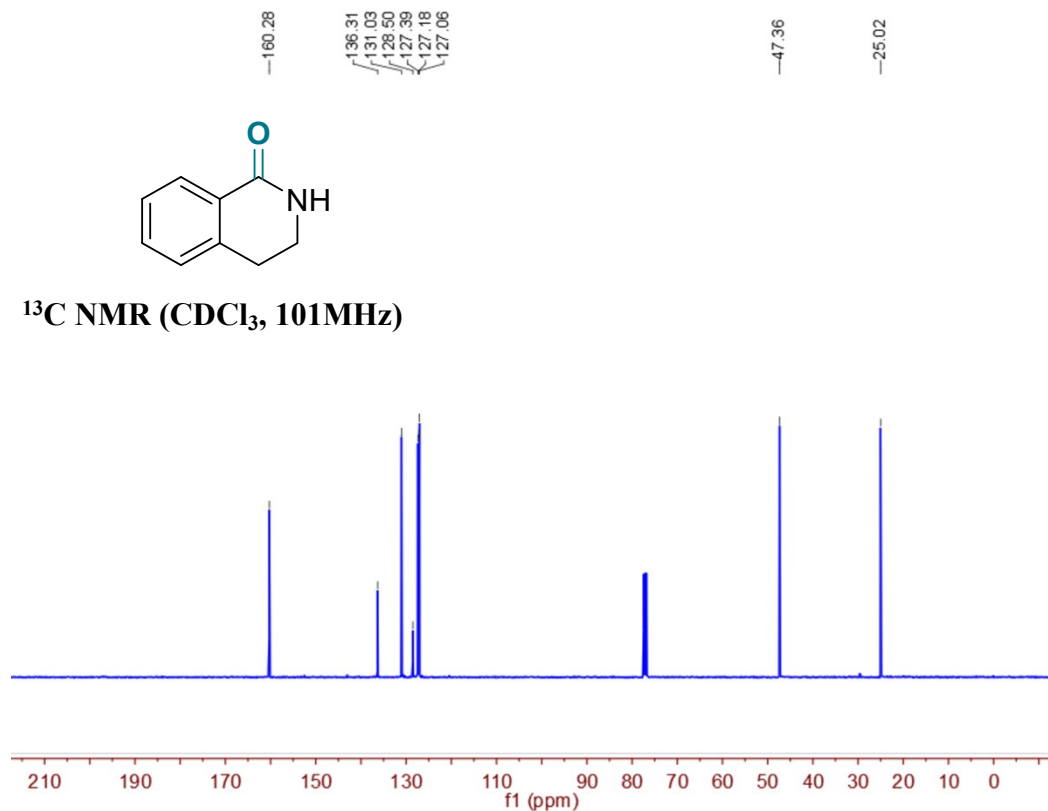

<sup>13</sup>C NMR Spectrum of Compound 3u

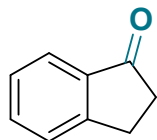

**<sup>1</sup>H NMR (CDCl<sub>3</sub>, 400MHz)**

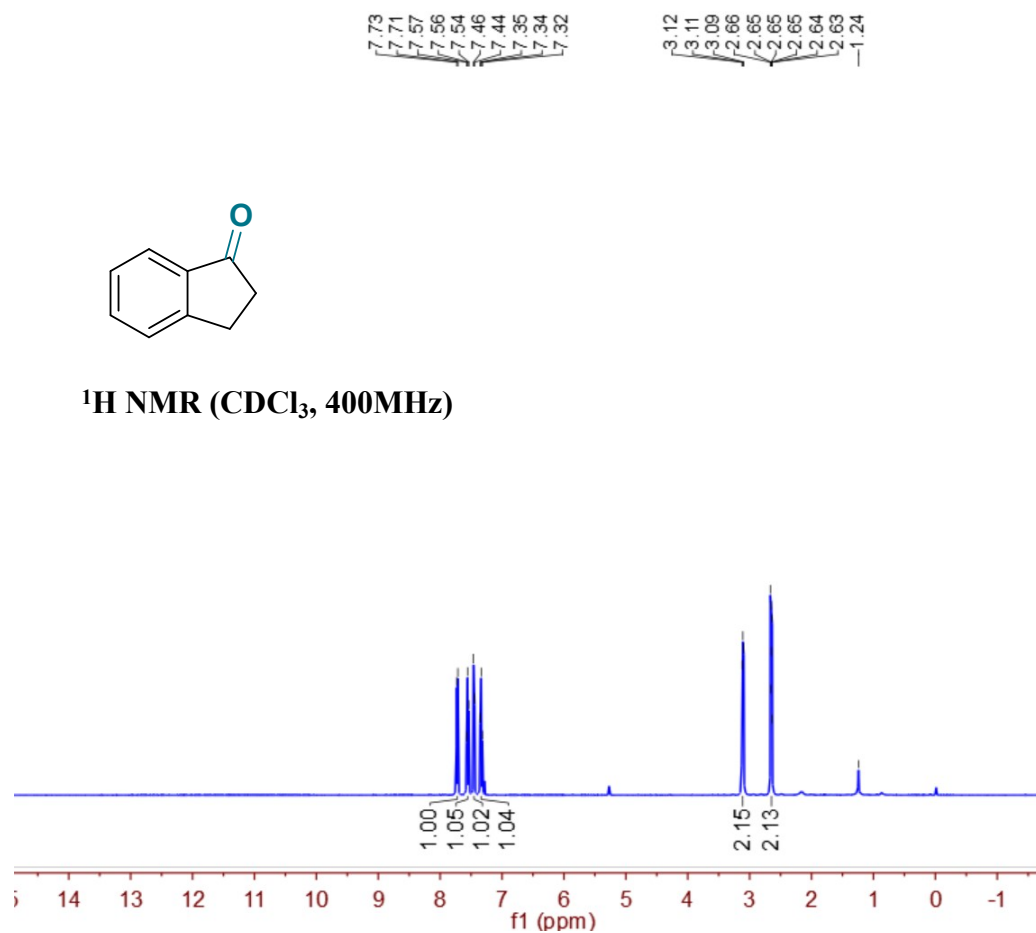

**<sup>1</sup>H NMR Spectrum of Compound 3v**

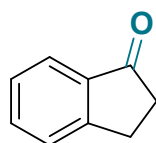

**<sup>13</sup>C NMR (CDCl<sub>3</sub>, 101MHz)**

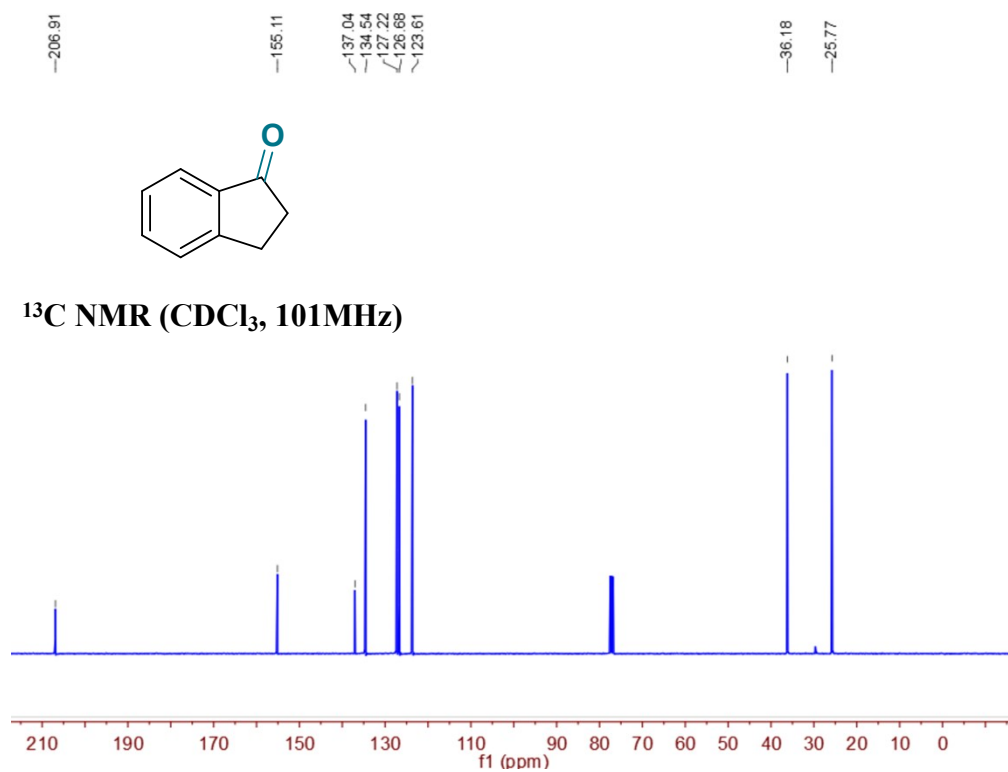

**<sup>13</sup>C NMR Spectrum of Compound 3v**

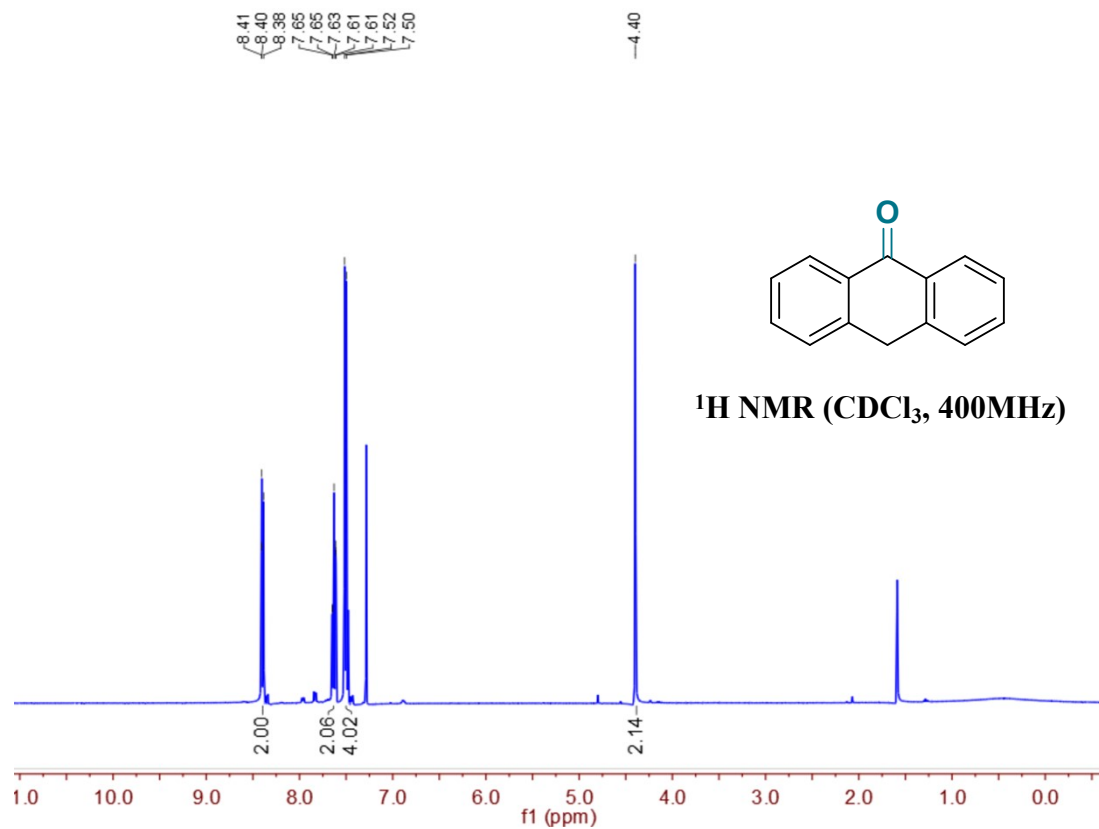

<sup>1</sup>H NMR Spectrum of Compound 3w

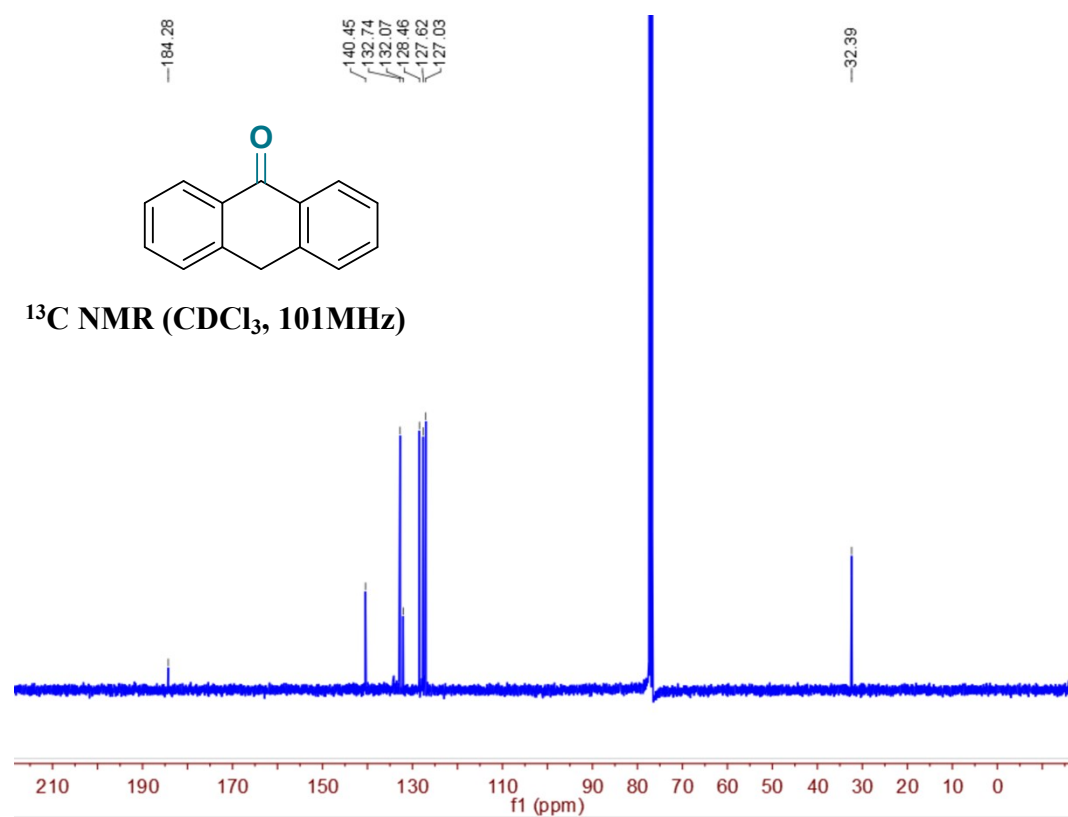

<sup>13</sup>C NMR Spectrum of Compound 3w

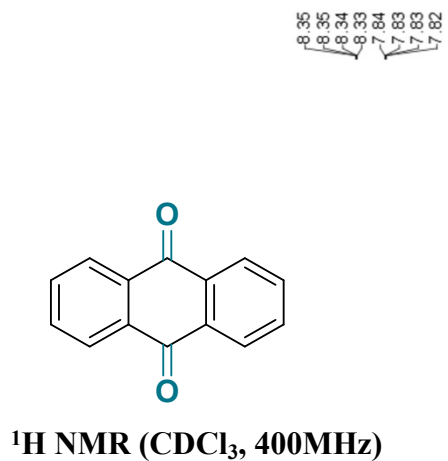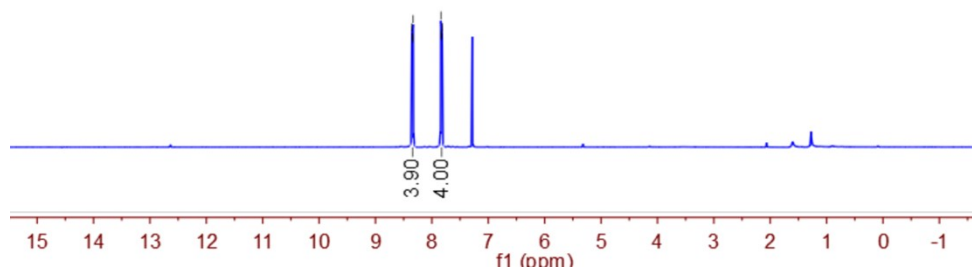

**<sup>1</sup>H NMR Spectrum of Compound 3x**

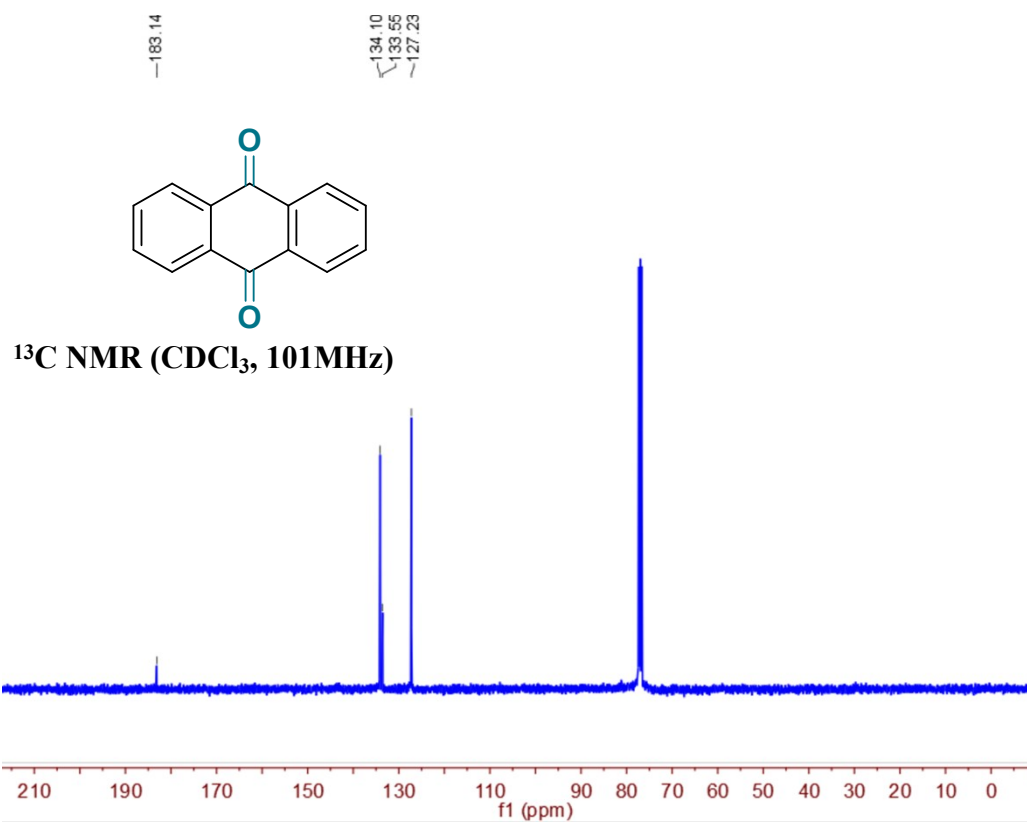

**<sup>13</sup>C NMR Spectrum of Compound 3x**

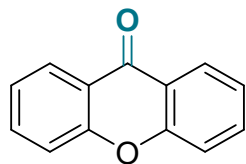

**<sup>1</sup>H NMR (CDCl<sub>3</sub>, 400MHz)**

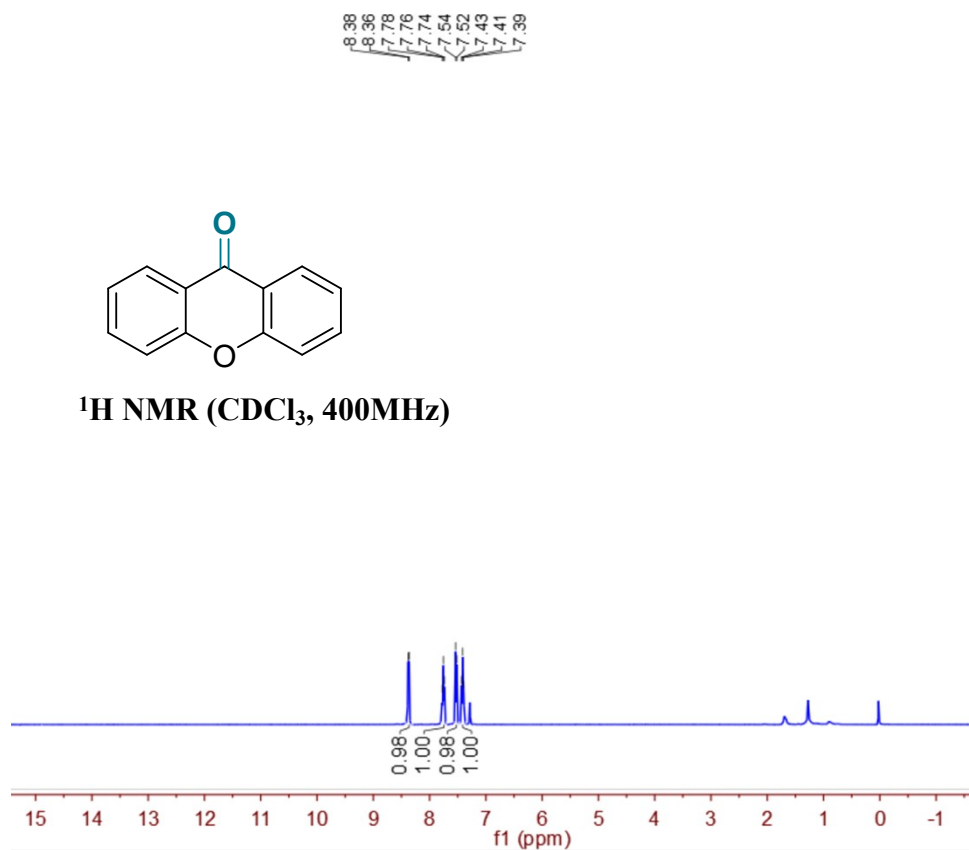

**<sup>1</sup>H NMR Spectrum of Compound 3y**

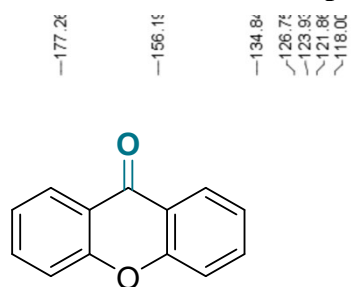

**<sup>13</sup>C NMR (CDCl<sub>3</sub>, 101MHz)**

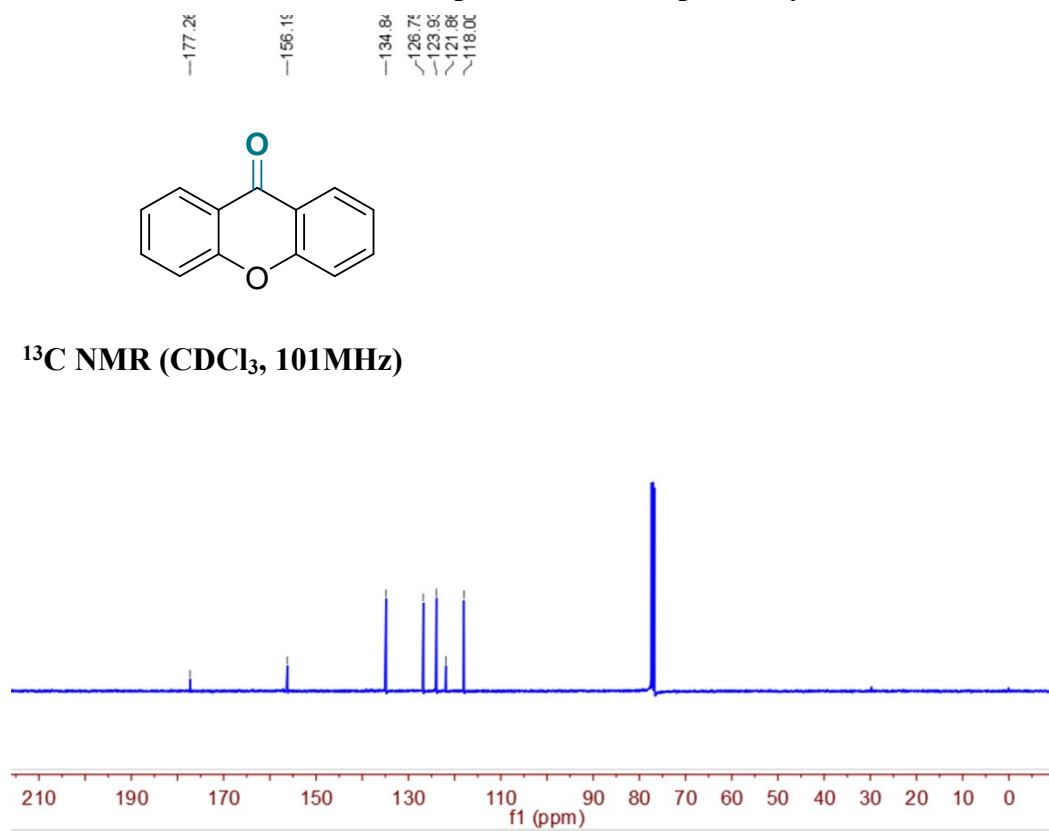

**<sup>13</sup>C NMR Spectrum of Compound 3y**

7.69  
7.67  
7.64  
7.64  
7.52  
7.52  
7.51  
7.50  
7.33  
7.33  
7.32  
7.31  
7.30  
7.29

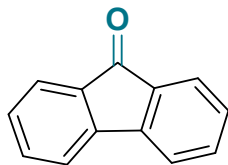

**<sup>1</sup>H NMR (CDCl<sub>3</sub>, 400MHz)**

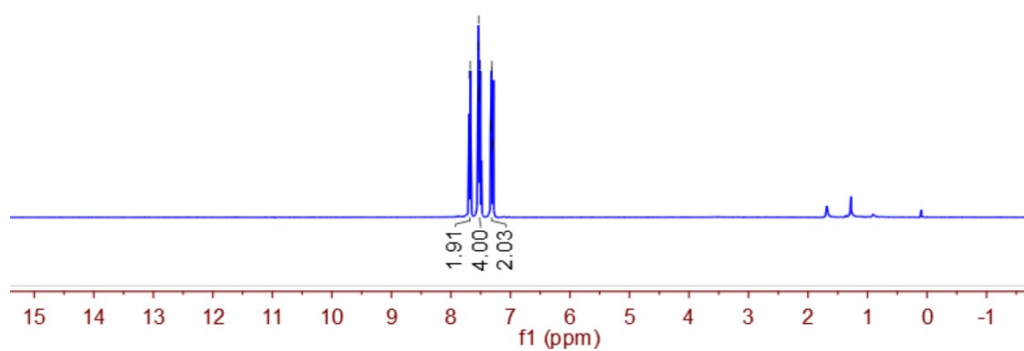

**<sup>1</sup>H NMR Spectrum of Compound 3z**

193.84  
144.44  
134.64  
134.19  
129.06  
124.30  
120.28

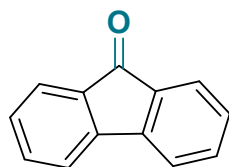

**<sup>13</sup>C NMR (CDCl<sub>3</sub>, 101MHz)**

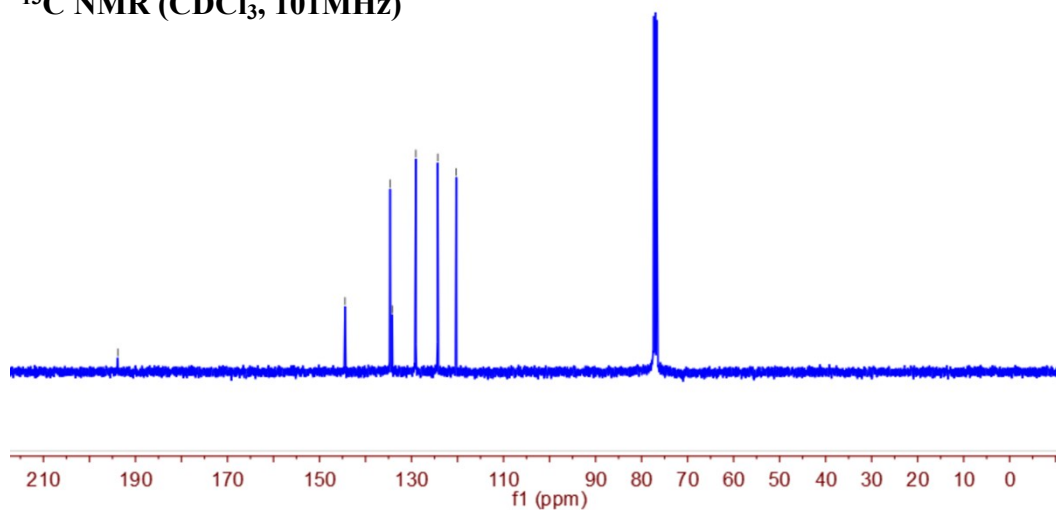

**<sup>13</sup>C NMR Spectrum of Compound 3z**

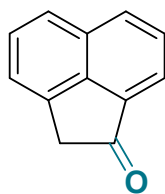

<sup>1</sup>H NMR (CDCl<sub>3</sub>, 400MHz)

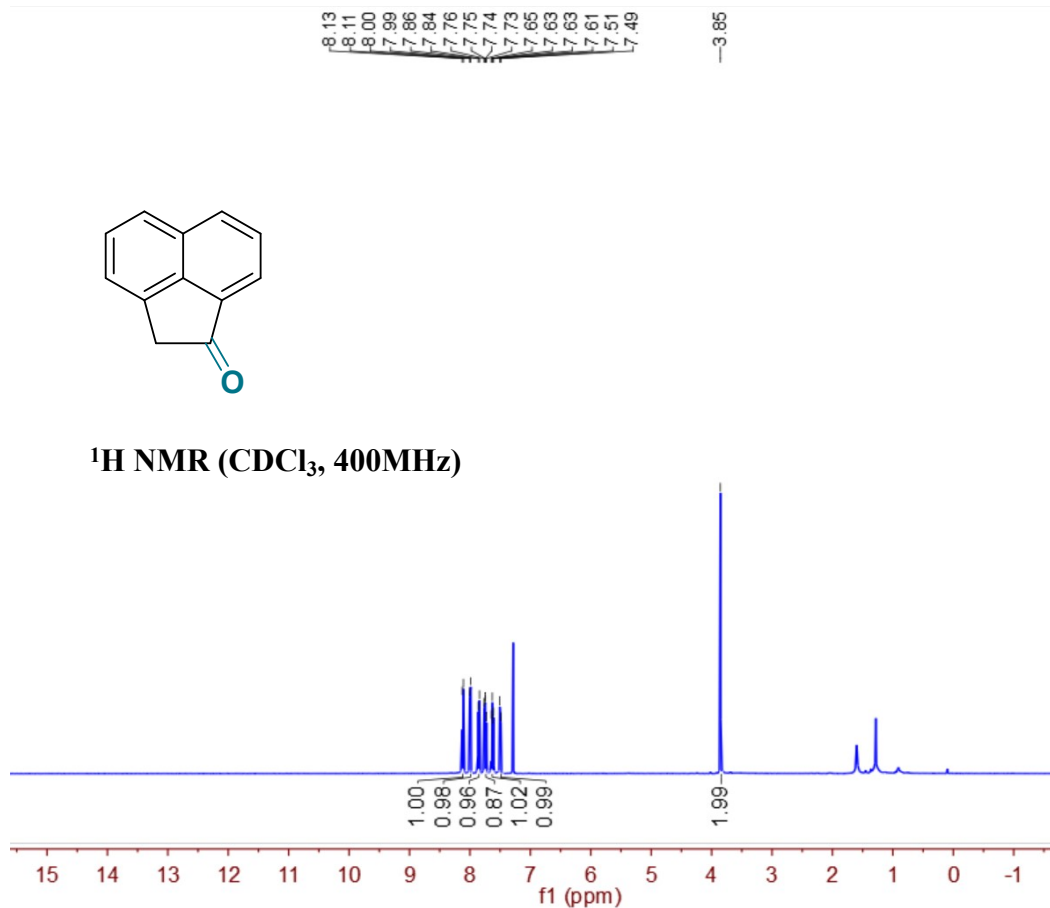

<sup>1</sup>H NMR Spectrum of Compound 3aa

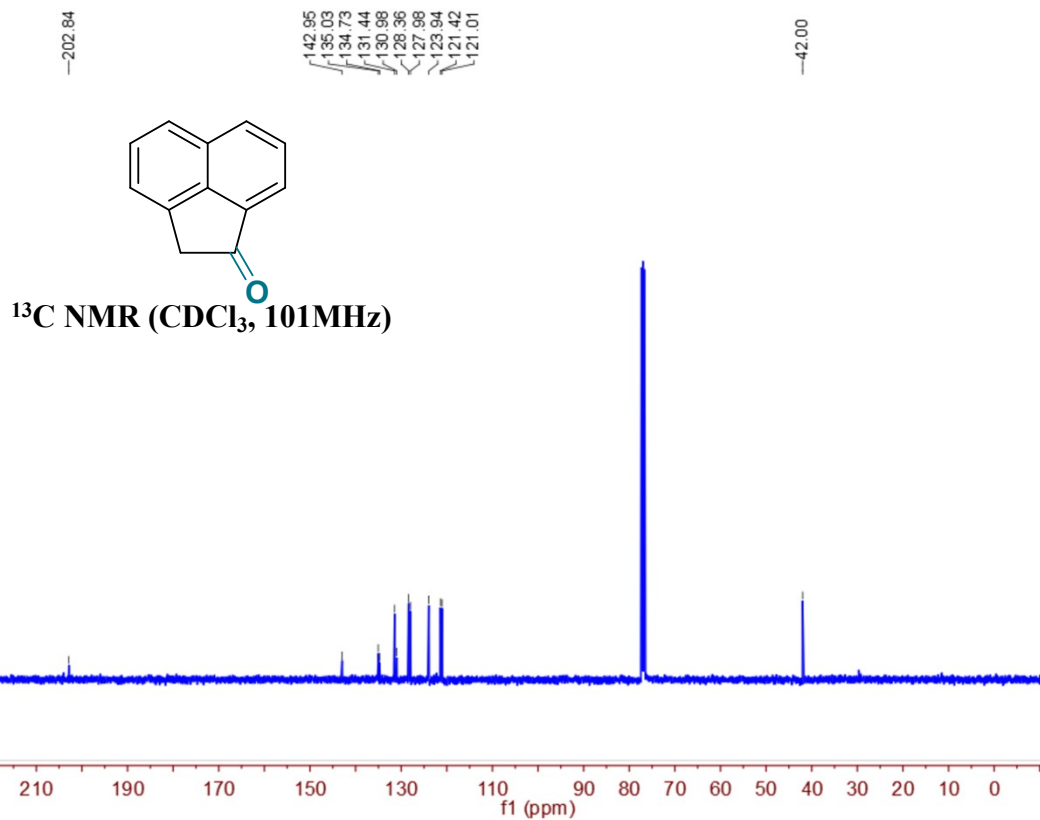

<sup>13</sup>C NMR (CDCl<sub>3</sub>, 101MHz)

<sup>13</sup>C NMR Spectrum of Compound 3aa

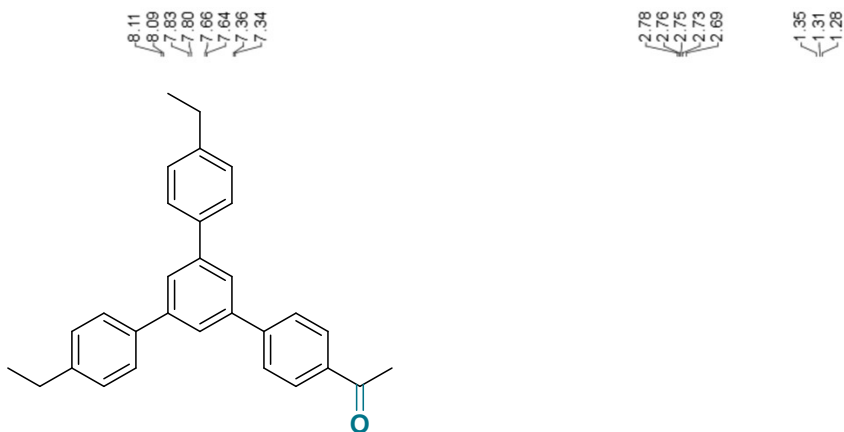

$^1\text{H NMR}$  ( $\text{CDCl}_3$ , 400MHz)

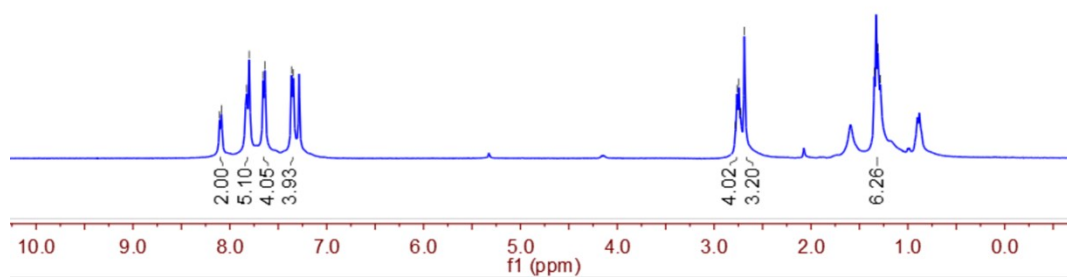

$^1\text{H NMR}$  Spectrum of Compound 3ab

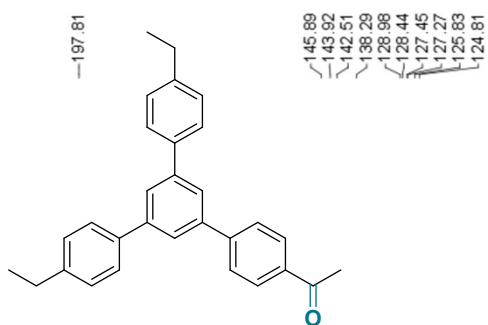

$^{13}\text{C NMR}$  ( $\text{CDCl}_3$ , 101MHz)

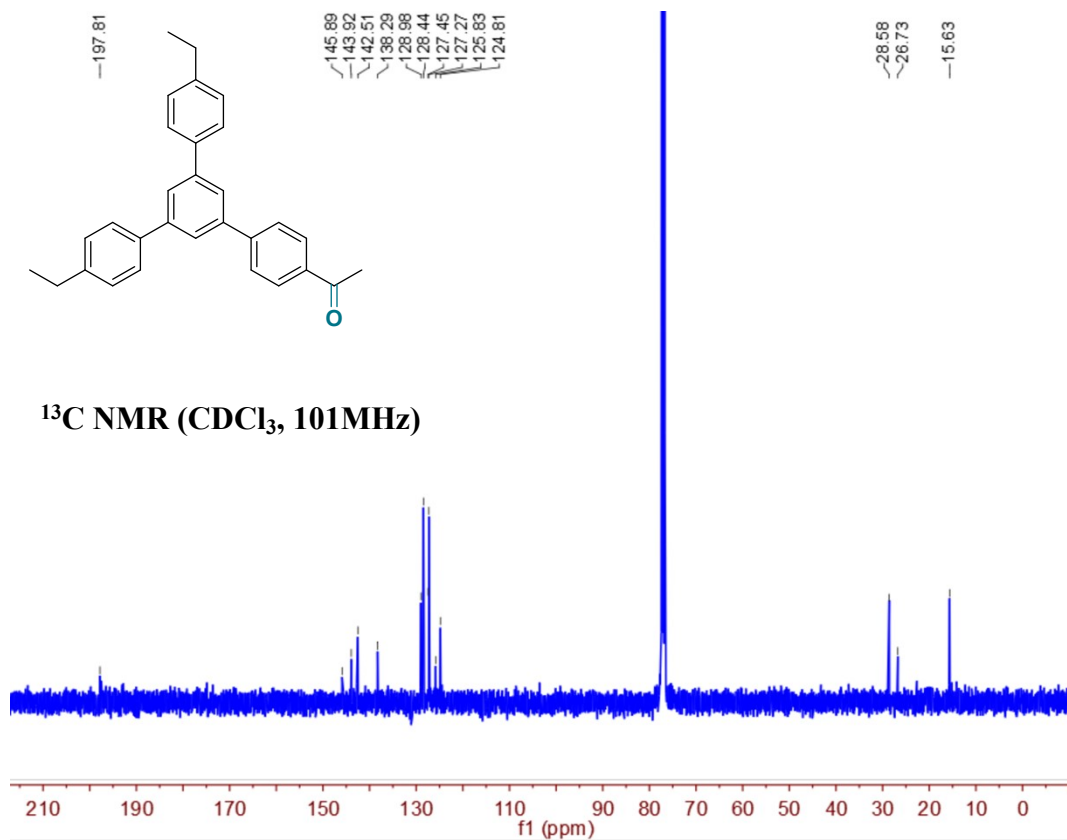

$^{13}\text{C NMR}$  Spectrum of Compound 3ab



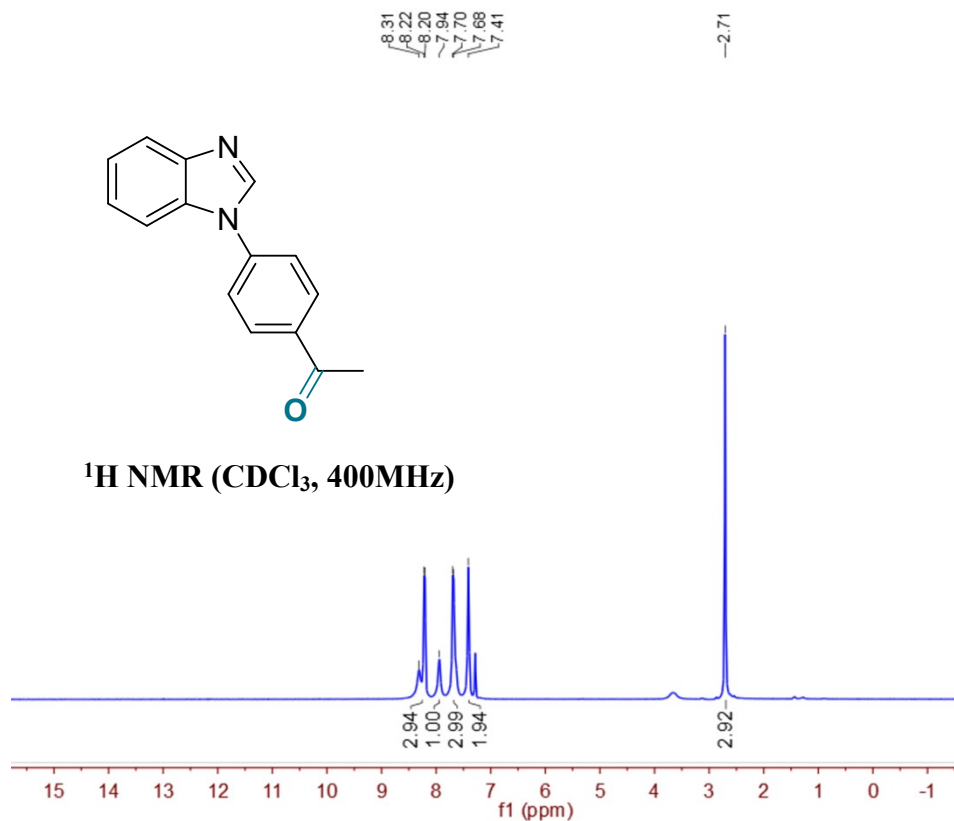

**<sup>1</sup>H NMR Spectrum of Compound 3ac**

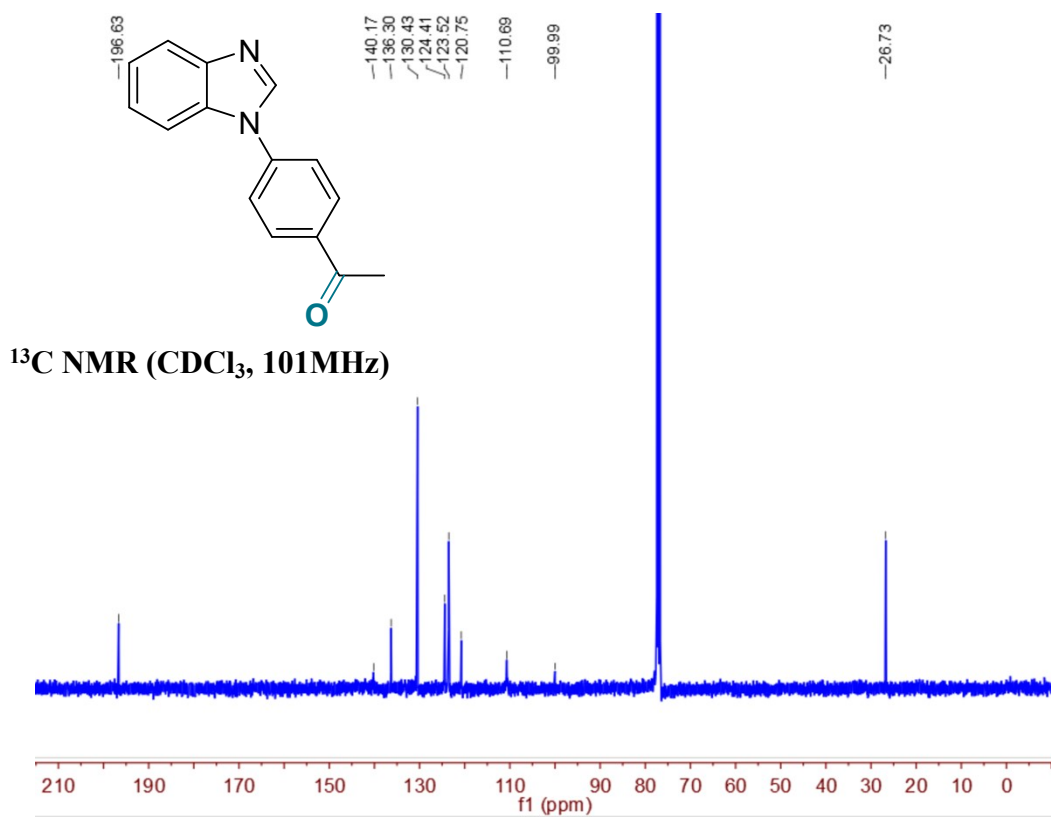

**<sup>13</sup>C NMR Spectrum of Compound 3ac**

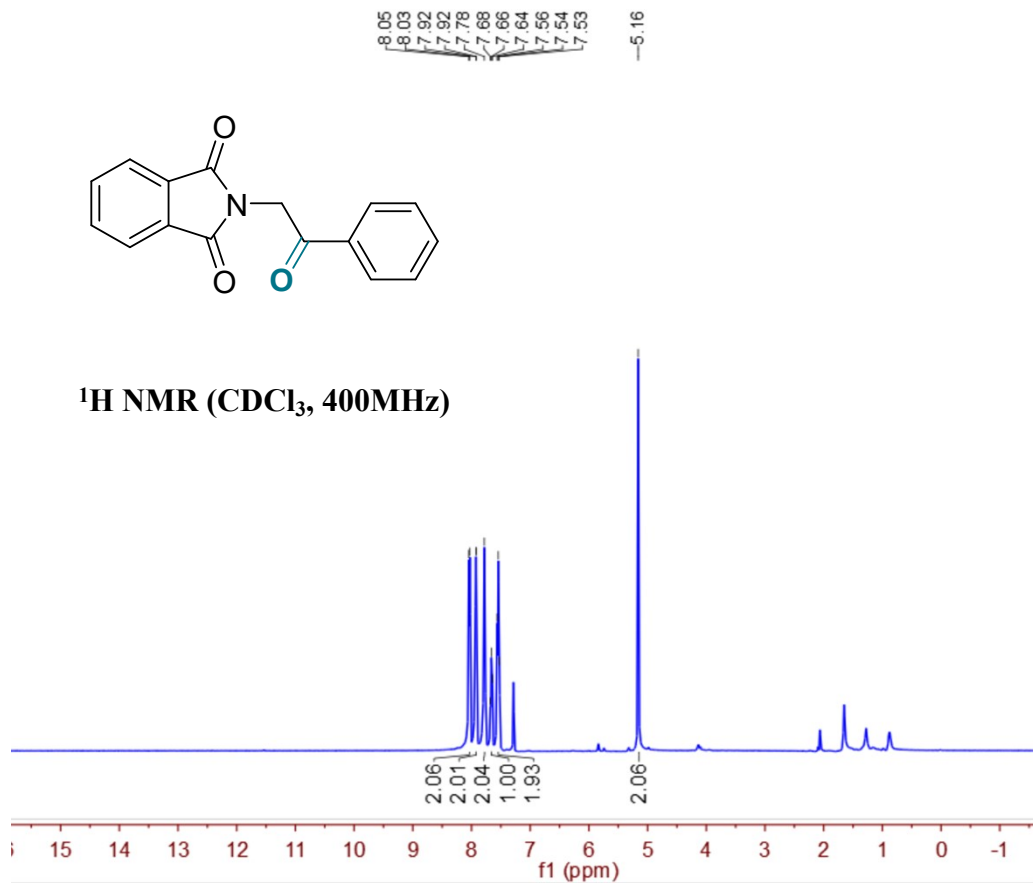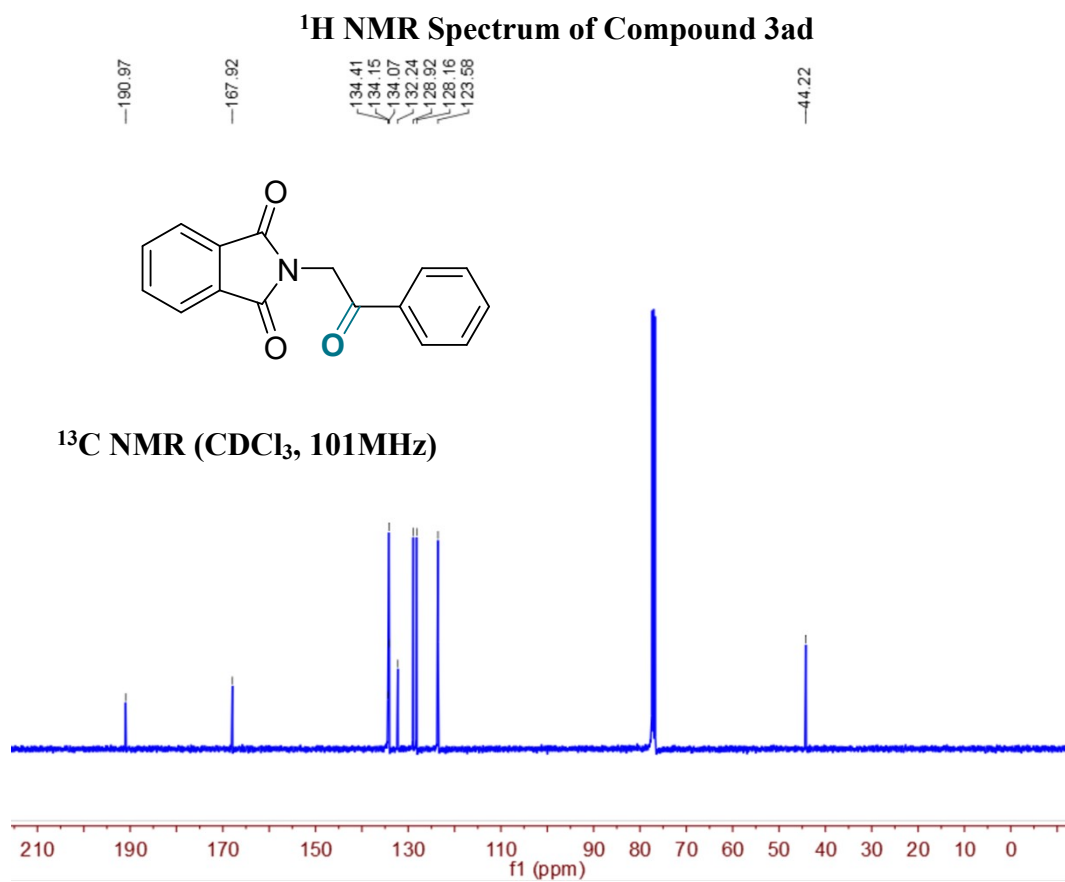

**$^{13}\text{C NMR}$  Spectrum of Compound 3ad**

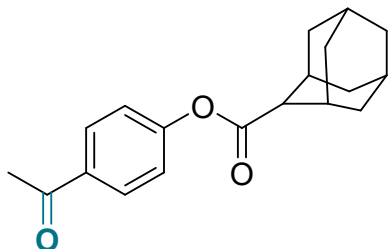

8.02  
8.00  
7.18  
7.16

2.62  
2.12  
2.09  
1.80

<sup>1</sup>H NMR (CDCl<sub>3</sub>, 400MHz)

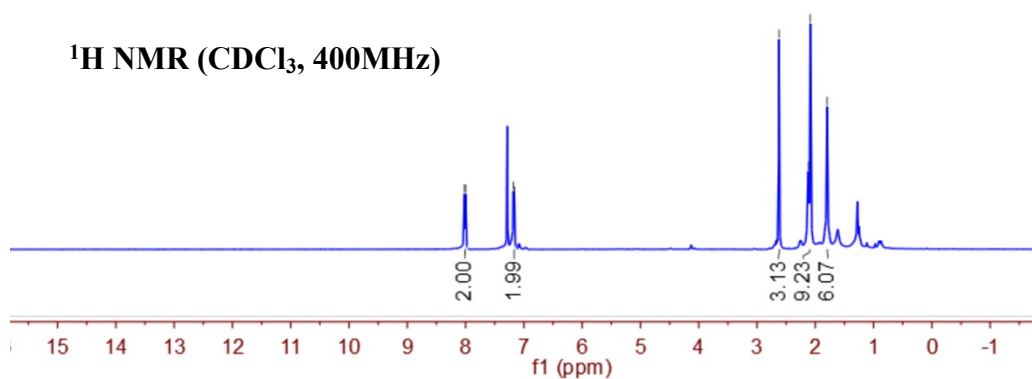

<sup>1</sup>H NMR Spectrum of Compound 3ae

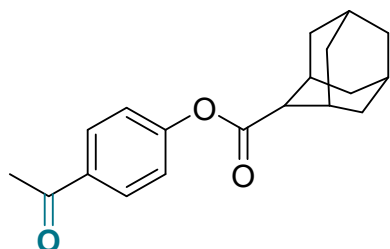

196.96

175.66

154.98

134.50

129.89

121.80

41.17

38.71

36.40

27.86

26.64

<sup>13</sup>C NMR (CDCl<sub>3</sub>, 101MHz)

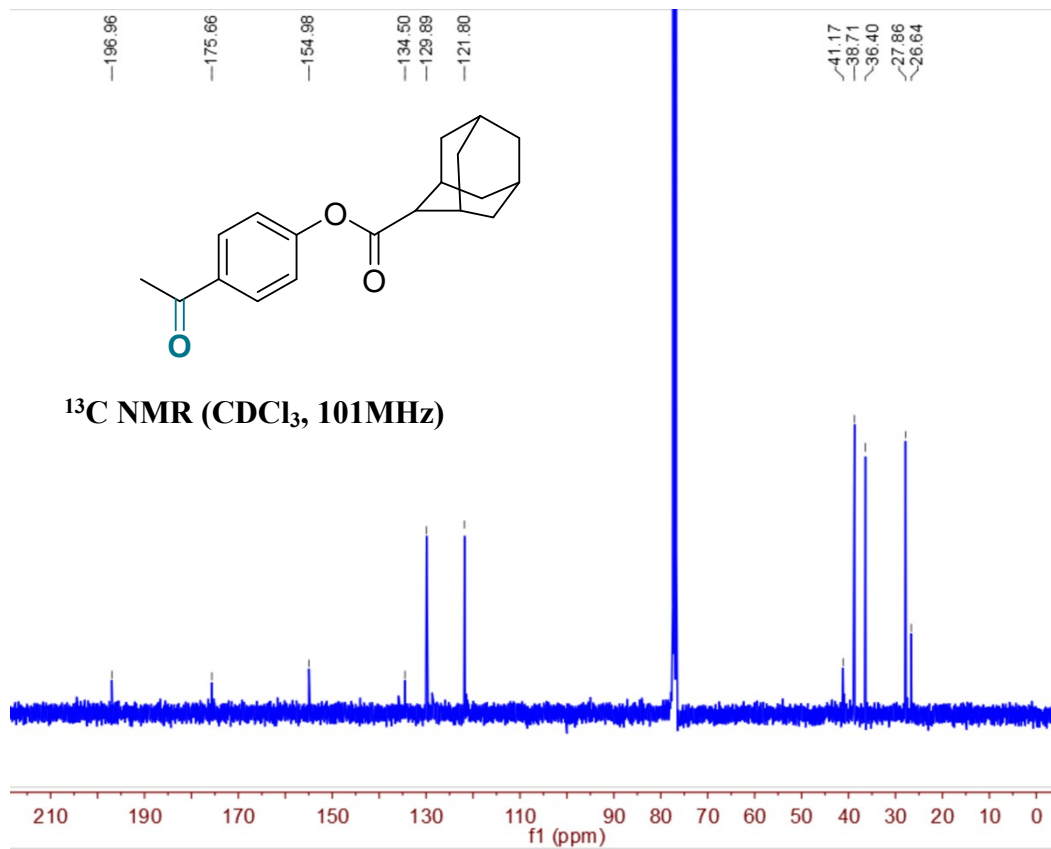

<sup>13</sup>C NMR Spectrum of Compound 3ae

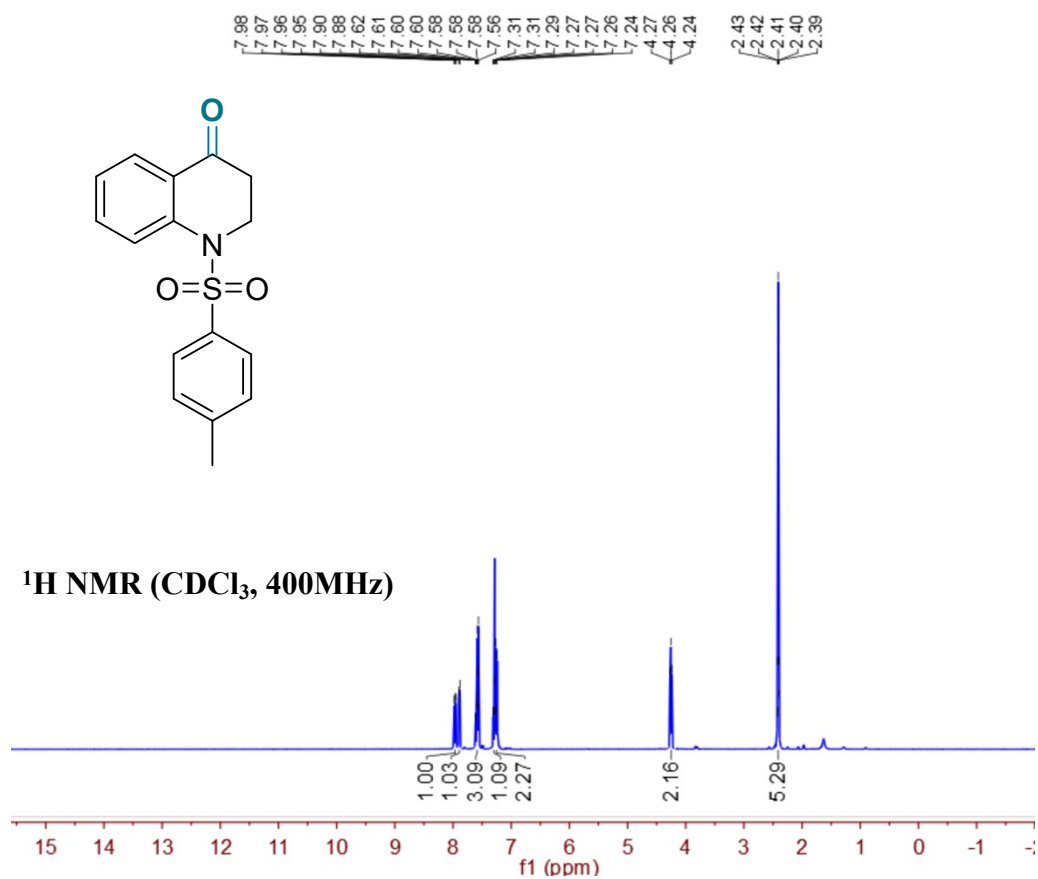

**<sup>1</sup>H NMR Spectrum of Compound 3af**

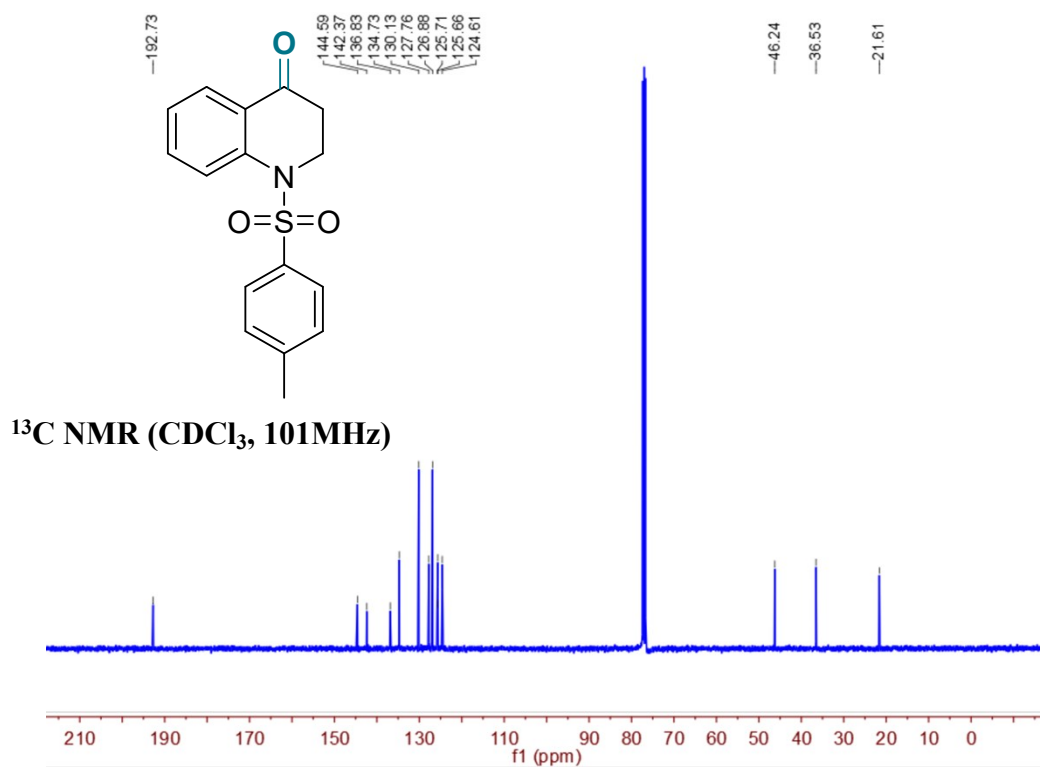

**<sup>13</sup>C NMR Spectrum of Compound 3af**

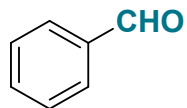

**<sup>1</sup>H NMR (CDCl<sub>3</sub>, 400MHz)**

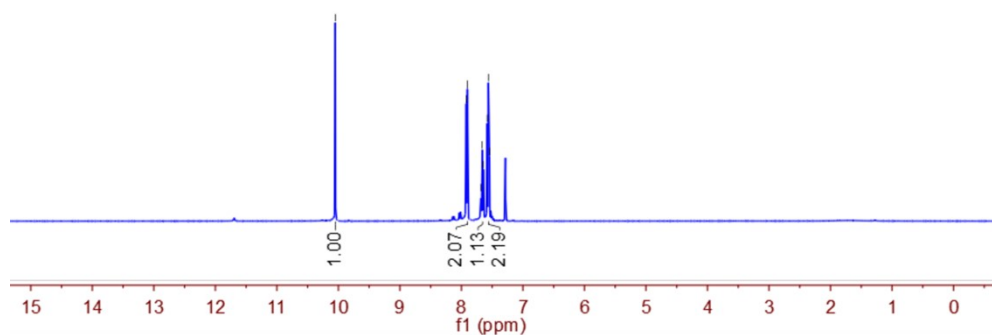

**<sup>1</sup>H NMR Spectrum of Compound 3ag**

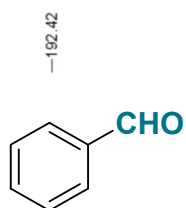

**<sup>13</sup>C NMR (CDCl<sub>3</sub>, 101MHz)**

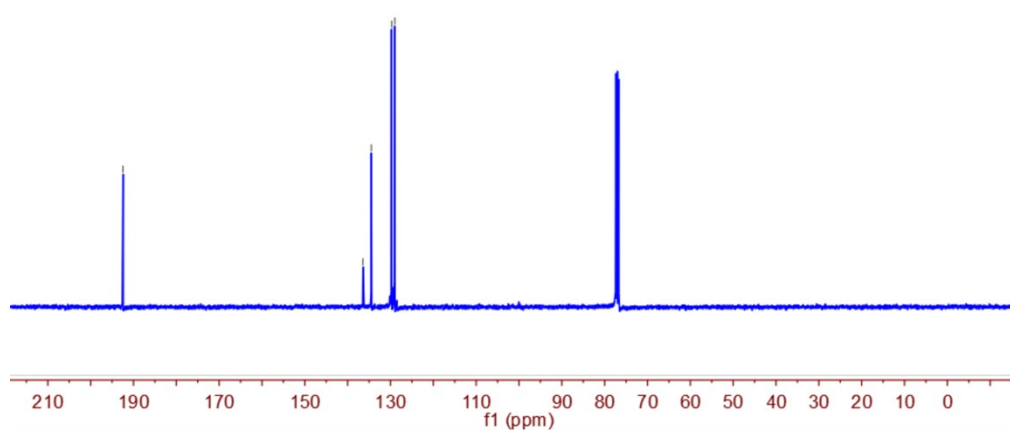

**<sup>13</sup>C NMR Spectrum of Compound 3ag**

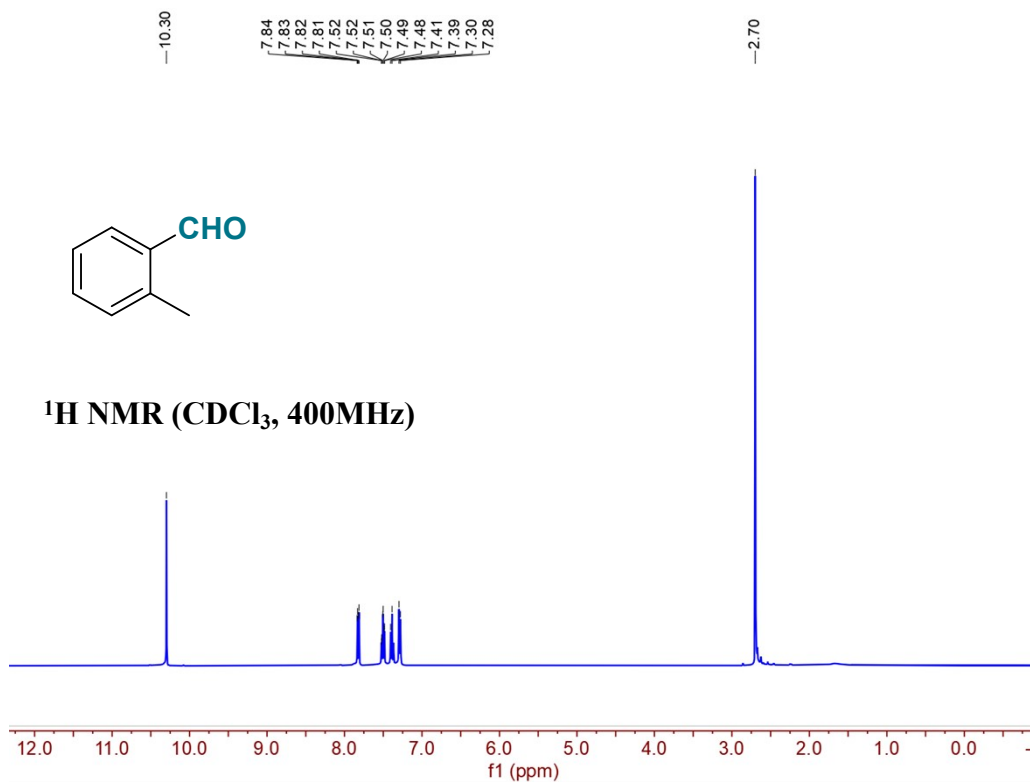

**<sup>1</sup>H NMR Spectrum of Compound 3ah**

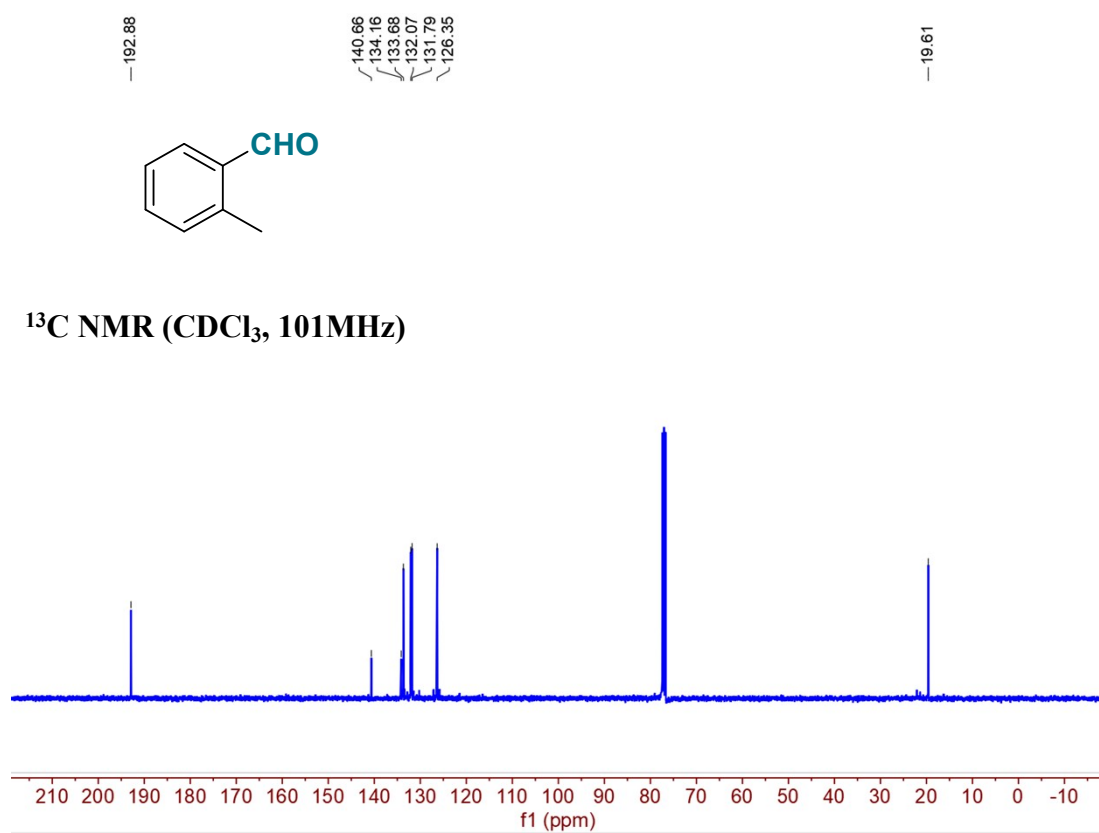

**<sup>13</sup>C NMR Spectrum of Compound 3ah**

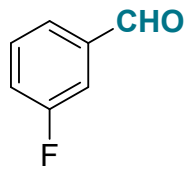

<sup>1</sup>H NMR (CDCl<sub>3</sub>, 400MHz)

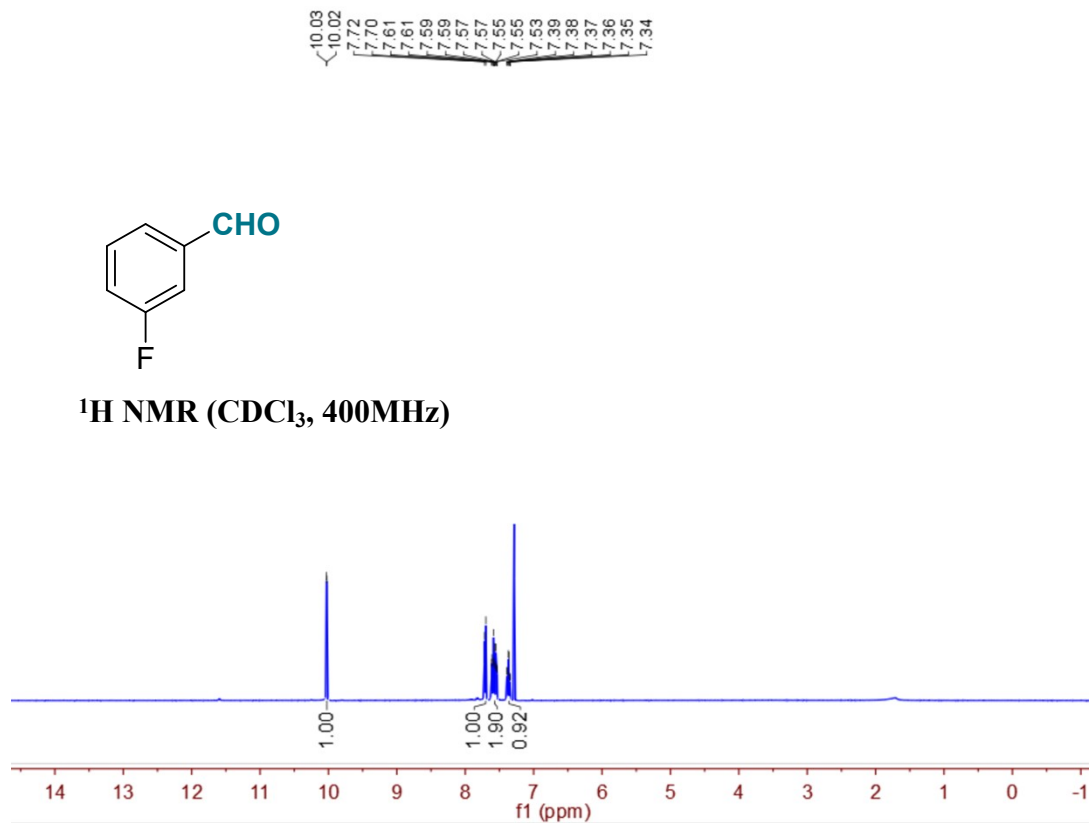

<sup>1</sup>H NMR Spectrum of Compound 3ai

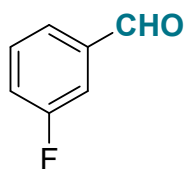

<sup>13</sup>C NMR (CDCl<sub>3</sub>, 101MHz)

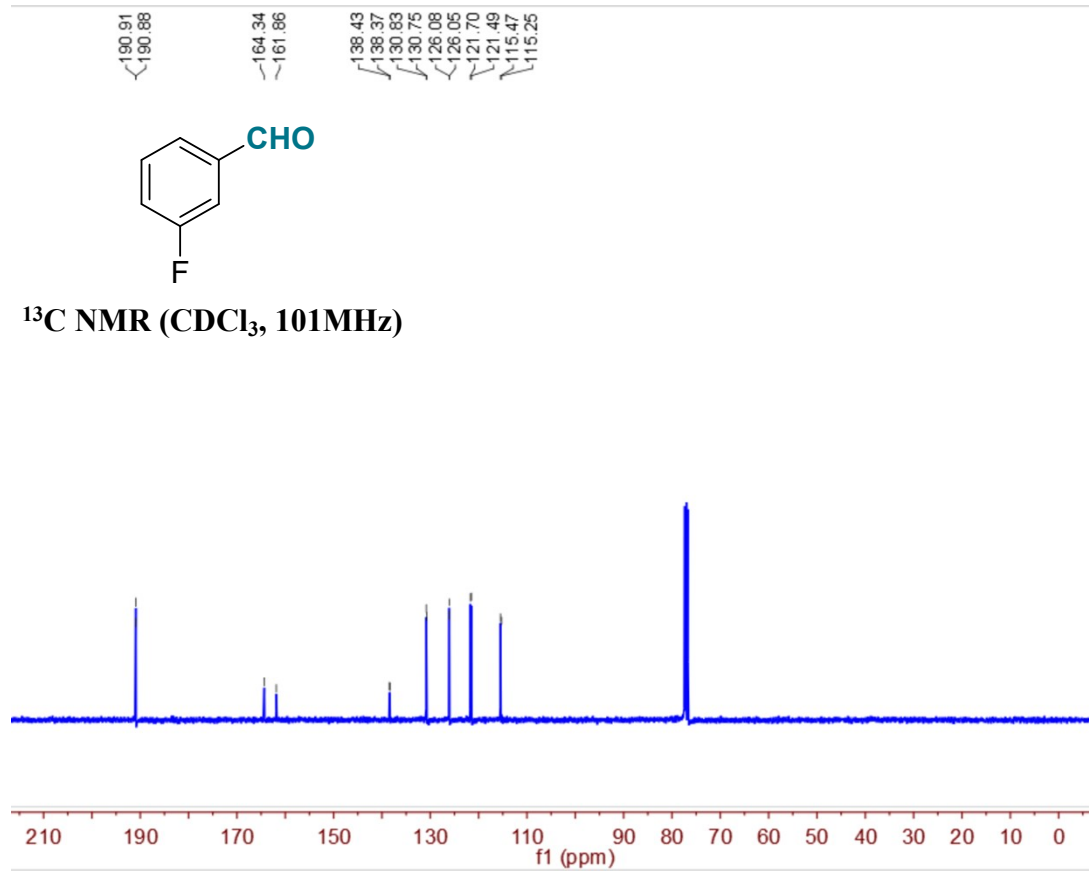

<sup>13</sup>C NMR Spectrum of Compound 3ai

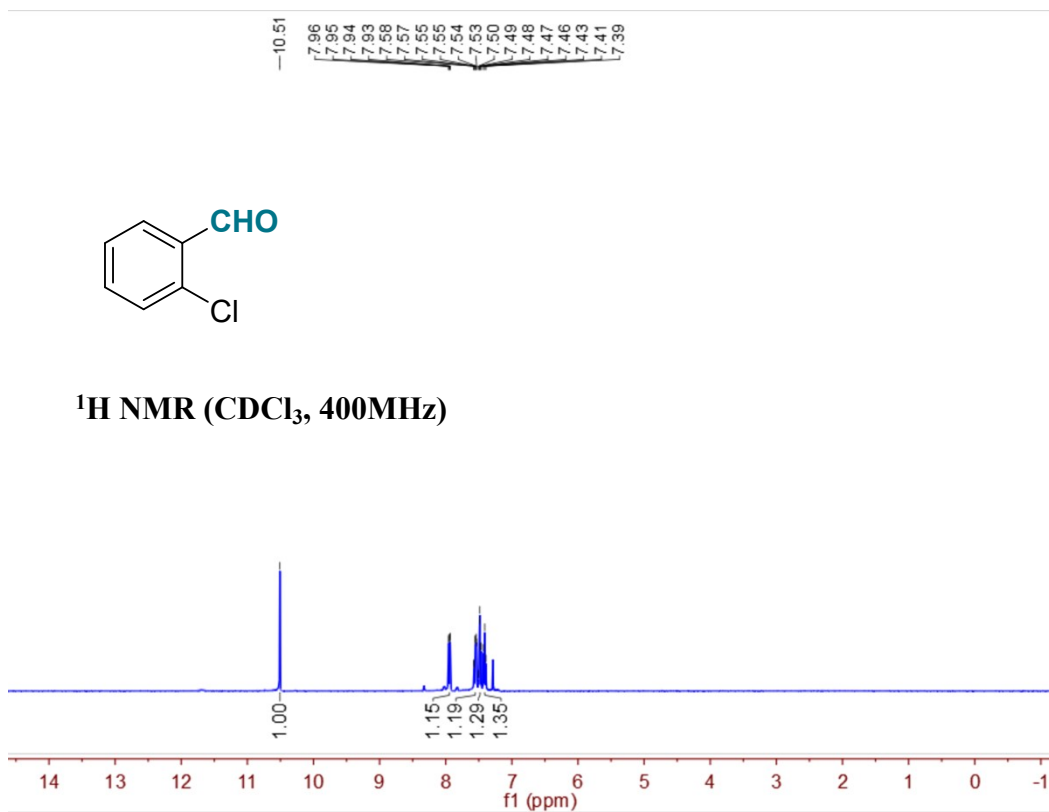

$^1\text{H NMR}$  Spectrum of Compound 3aj

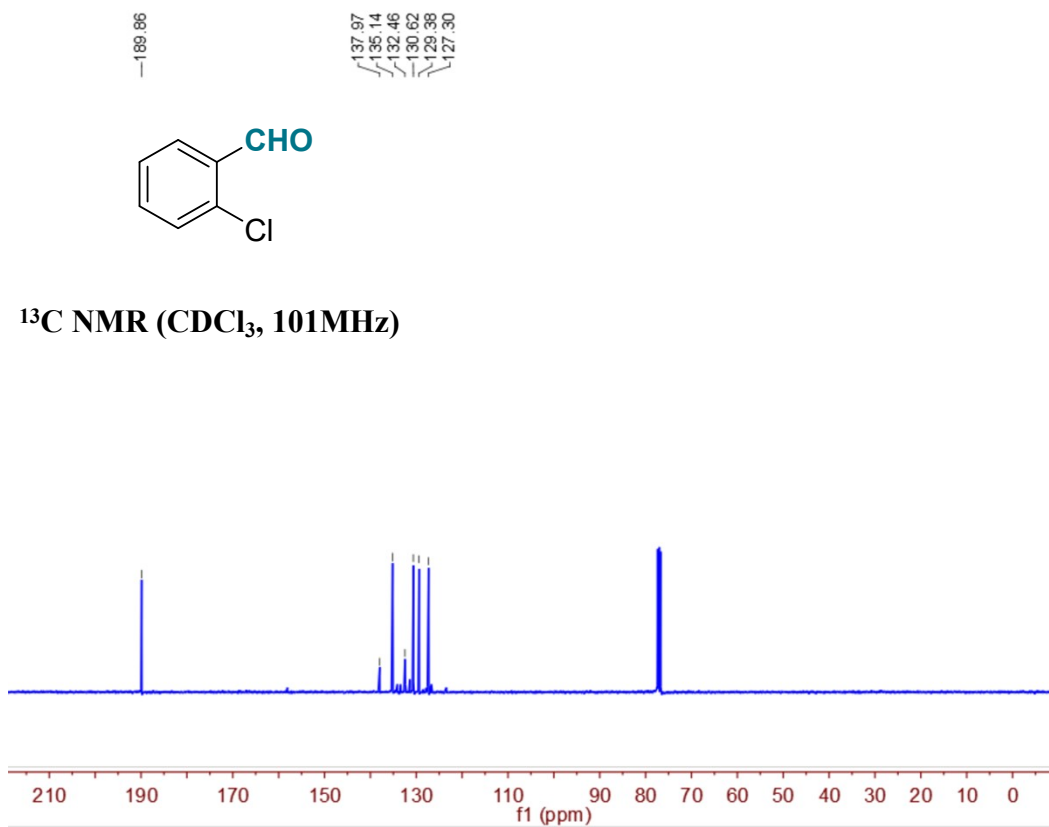

$^{13}\text{C NMR}$  Spectrum of Compound 3aj



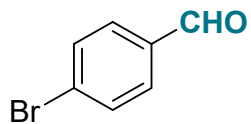

**<sup>1</sup>H NMR (CDCl<sub>3</sub>, 400MHz)**

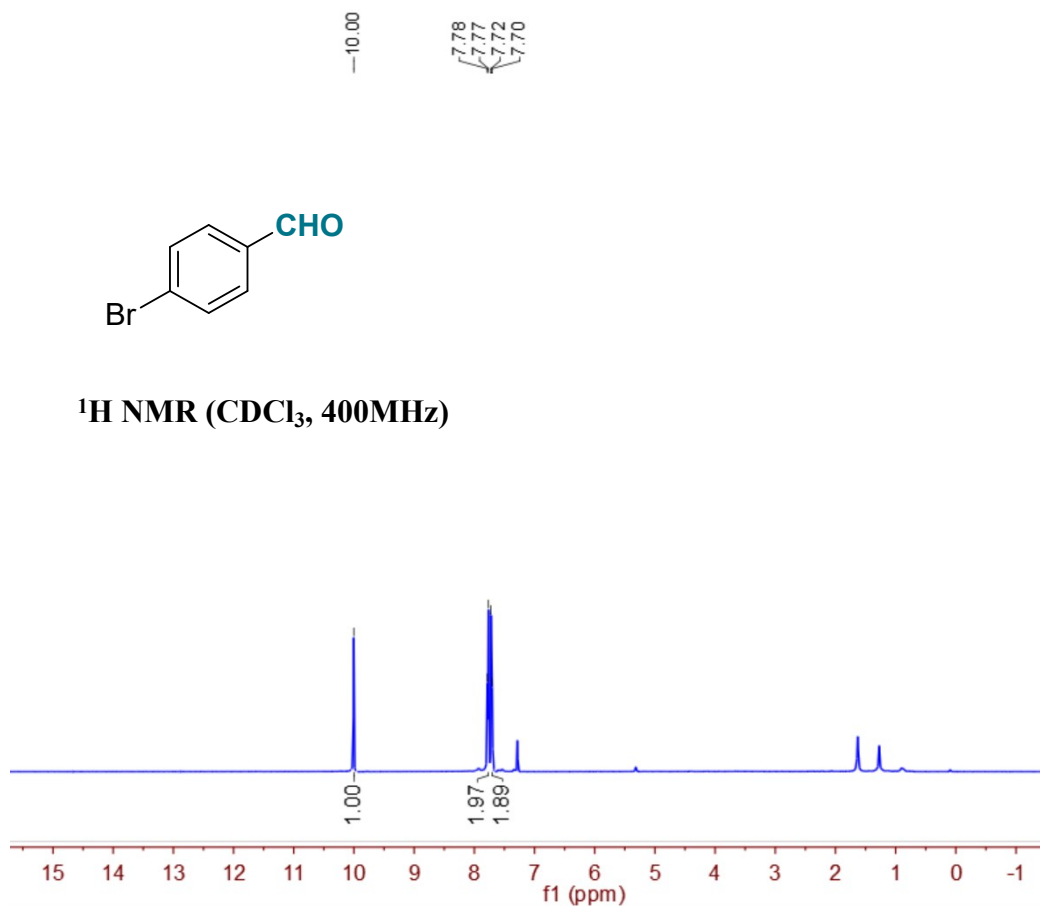

**<sup>1</sup>H NMR Spectrum of Compound 3ak**

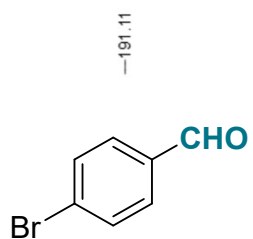

**<sup>13</sup>C NMR (CDCl<sub>3</sub>, 101MHz)**

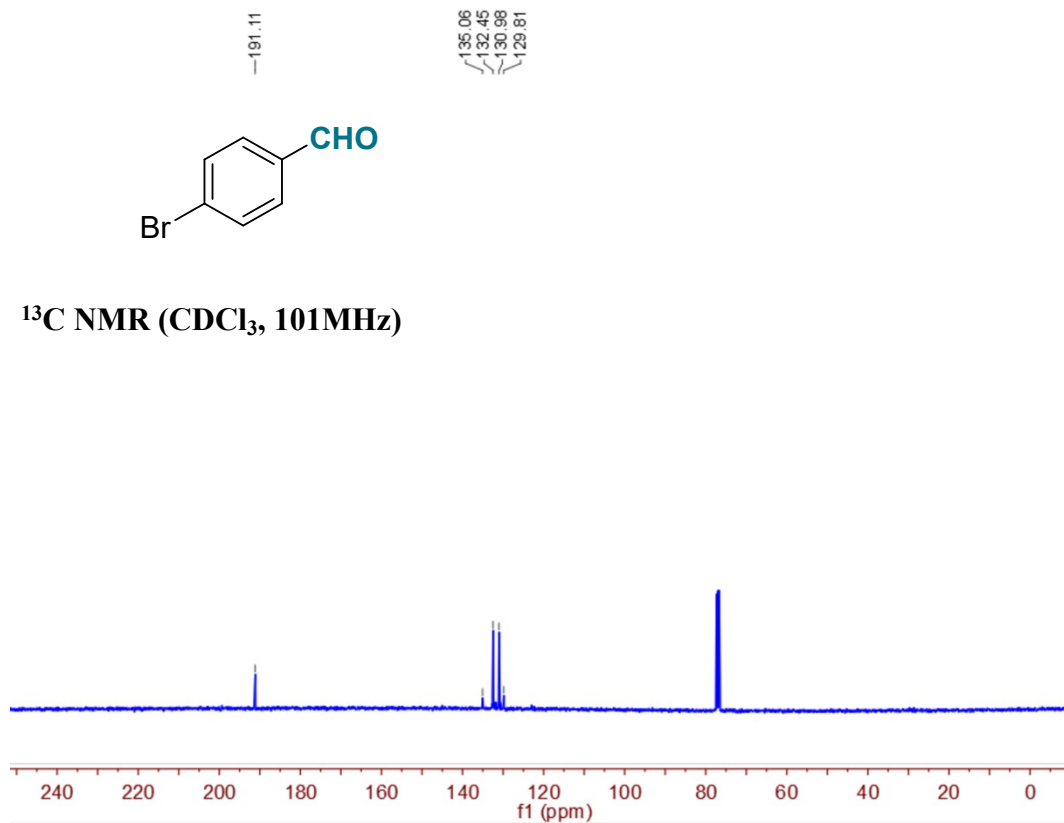

**<sup>13</sup>C NMR Spectrum of Compound 3ak**

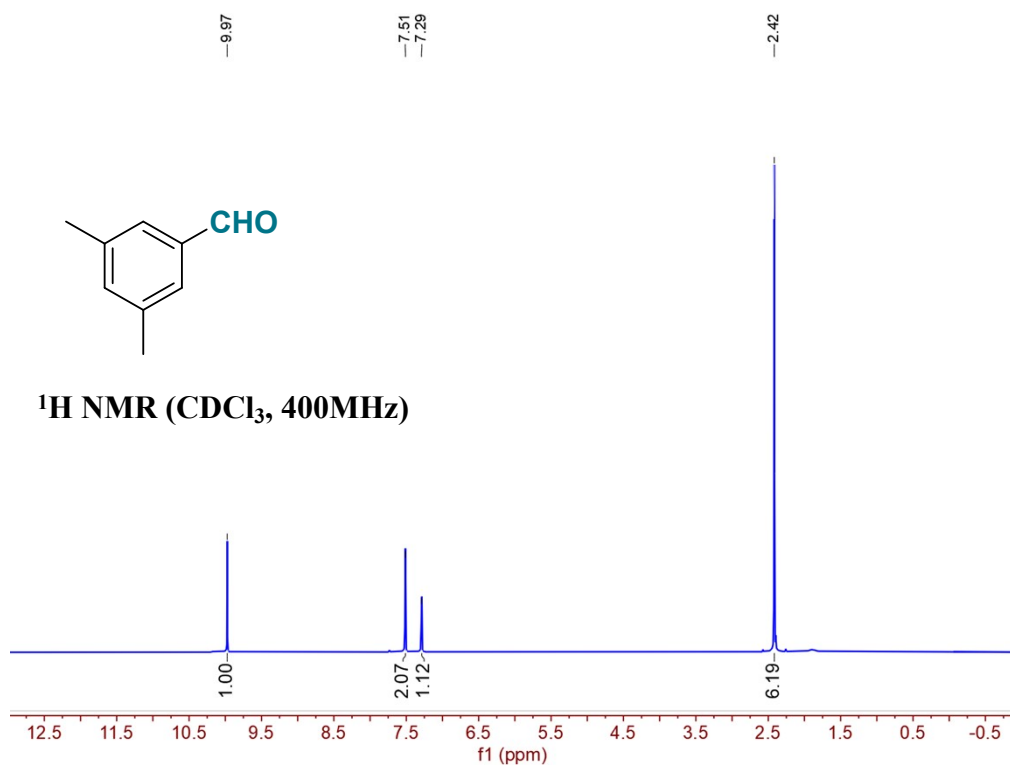

**<sup>1</sup>H NMR Spectrum of Compound 3al**

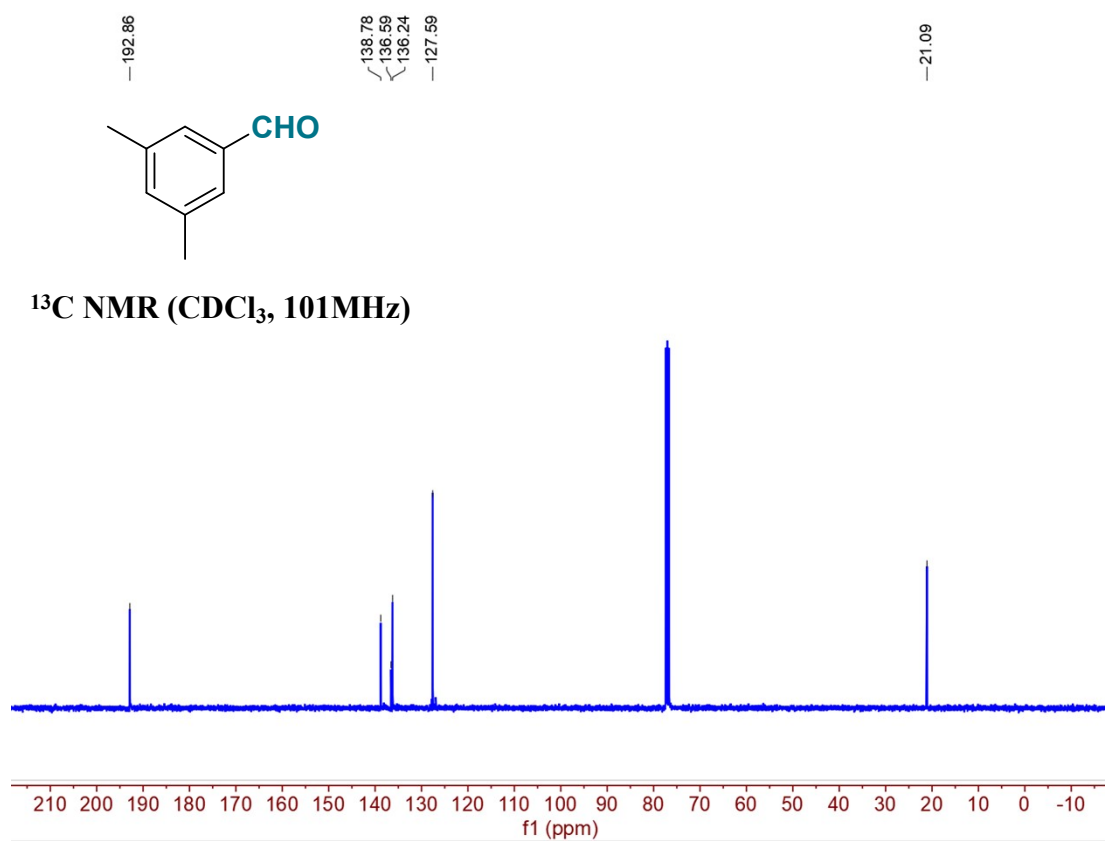

**<sup>13</sup>C NMR Spectrum of Compound 3al**

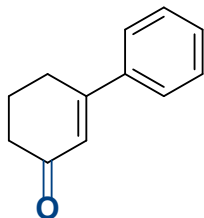

7.55  
7.55  
7.54  
7.43  
7.42  
6.44

2.81  
2.79  
2.78  
2.52  
2.50  
2.49  
2.19  
2.17  
2.16

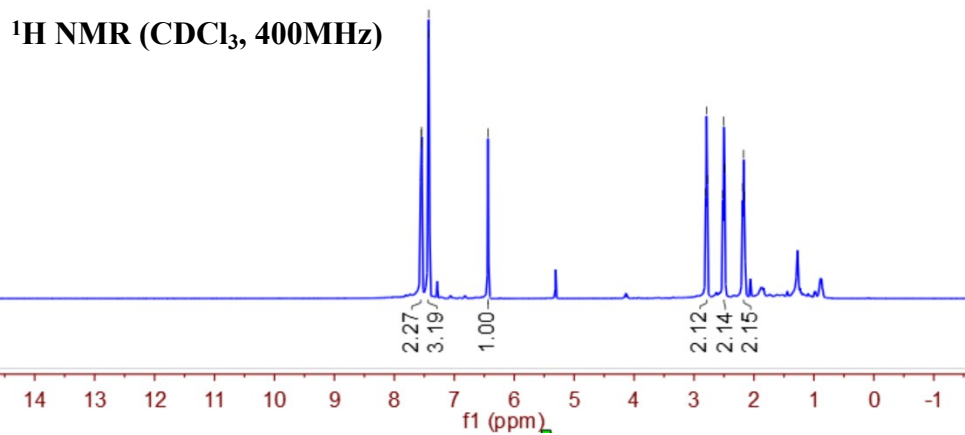

**<sup>1</sup>H NMR Spectrum of Compound 4a**

199.98  
159.85  
136.80  
130.00  
128.77  
26.09  
25.45  
37.29  
28.13  
22.83

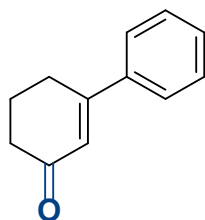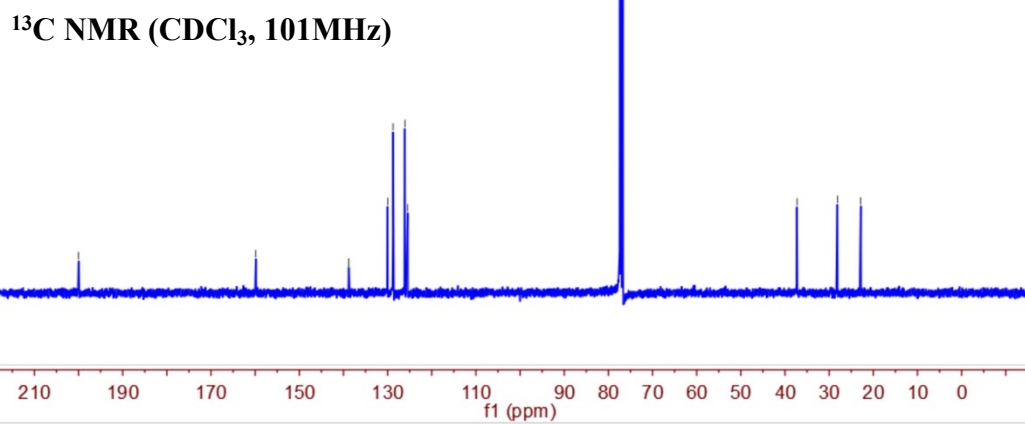

**<sup>13</sup>C NMR Spectrum of Compound 4a**

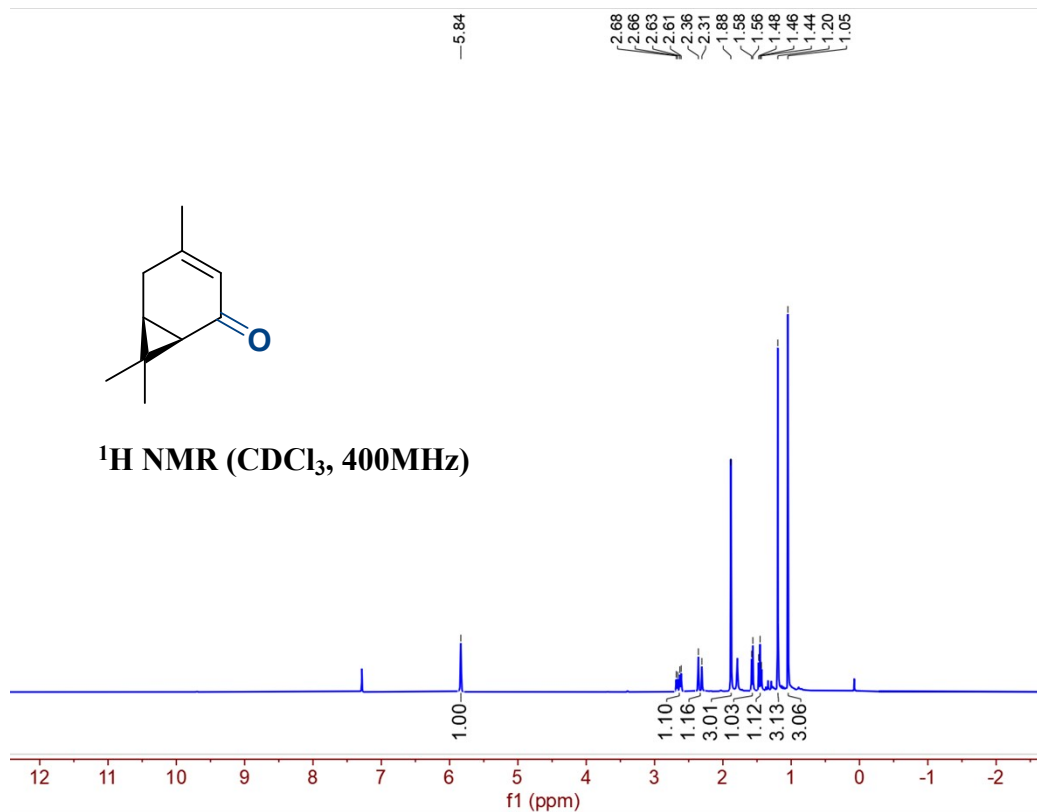

**<sup>1</sup>H NMR Spectrum of Compound 4b**

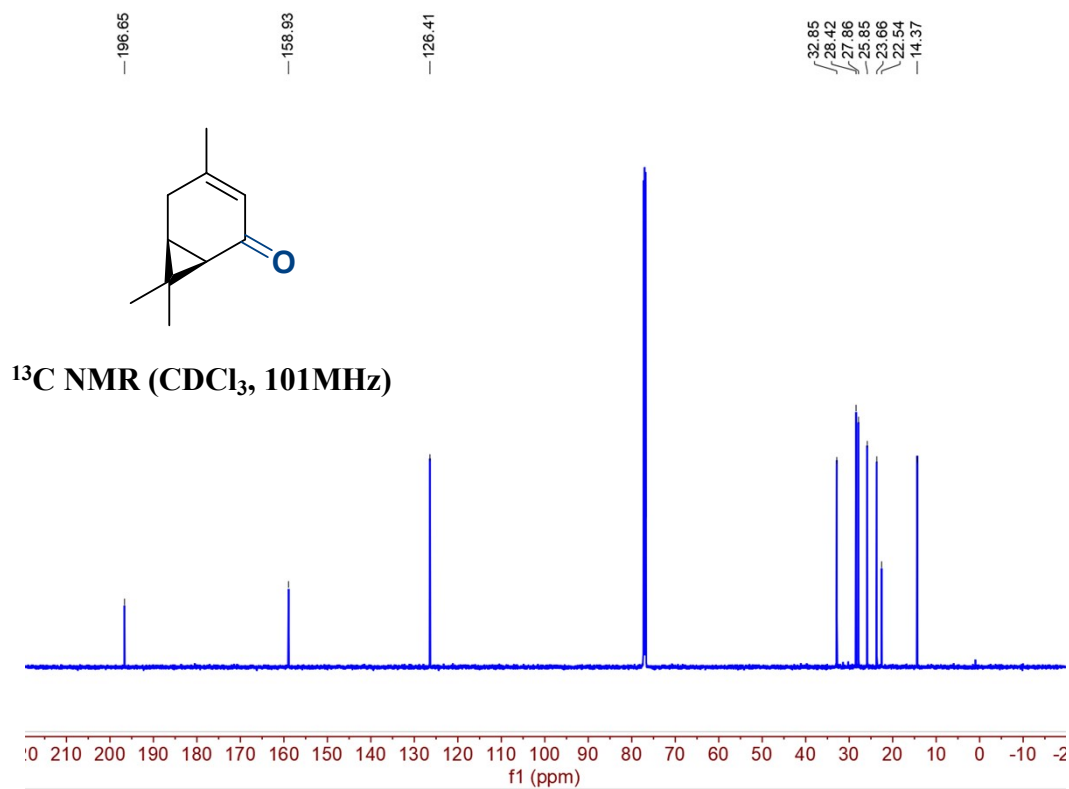

**<sup>13</sup>C NMR Spectrum of Compound 4b**

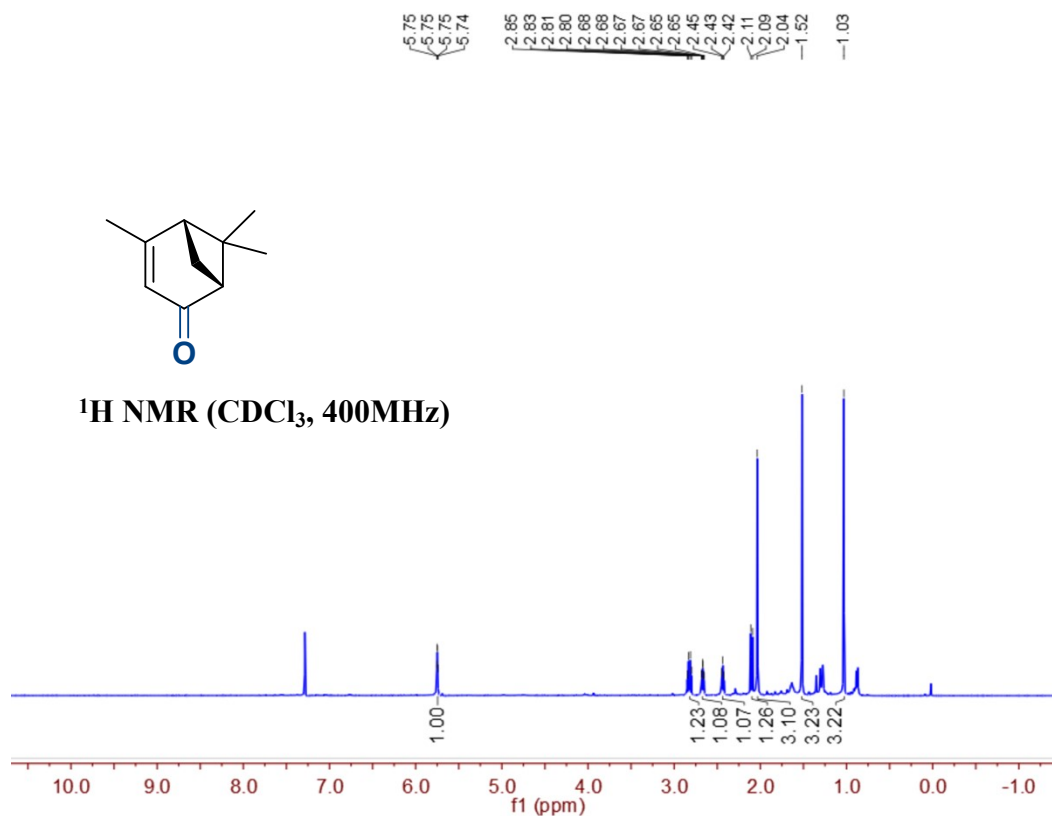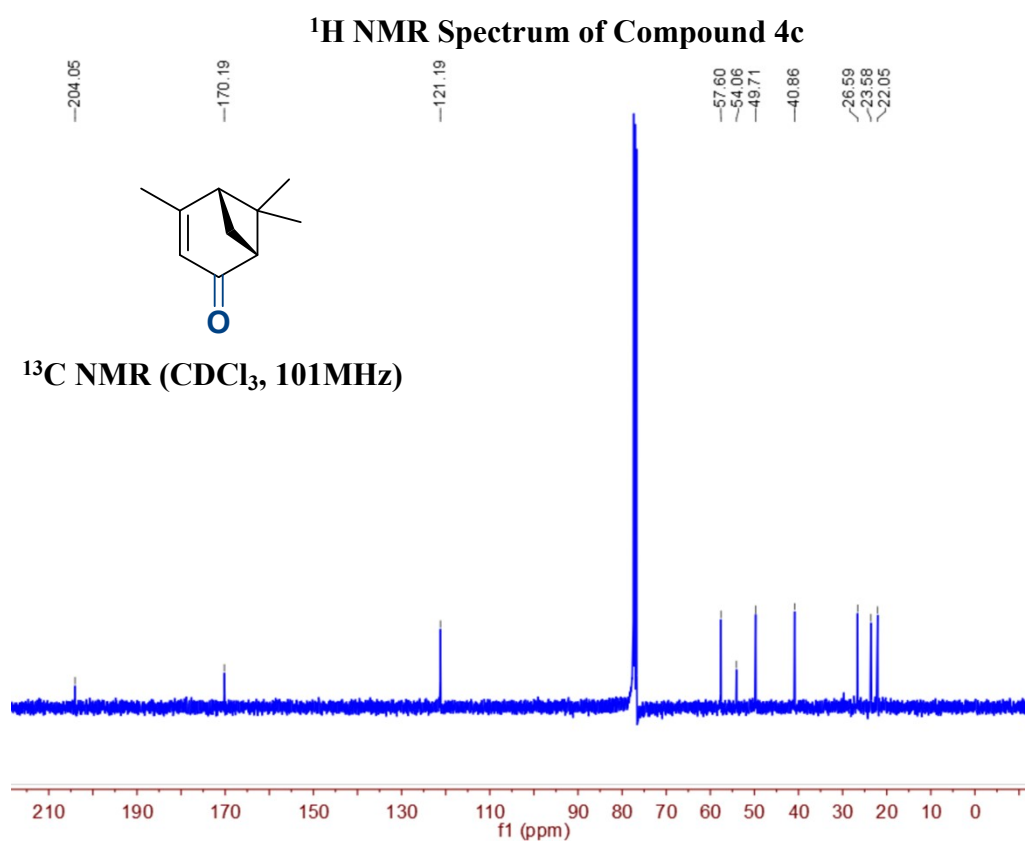

**$^{13}\text{C NMR}$  Spectrum of Compound 4c**

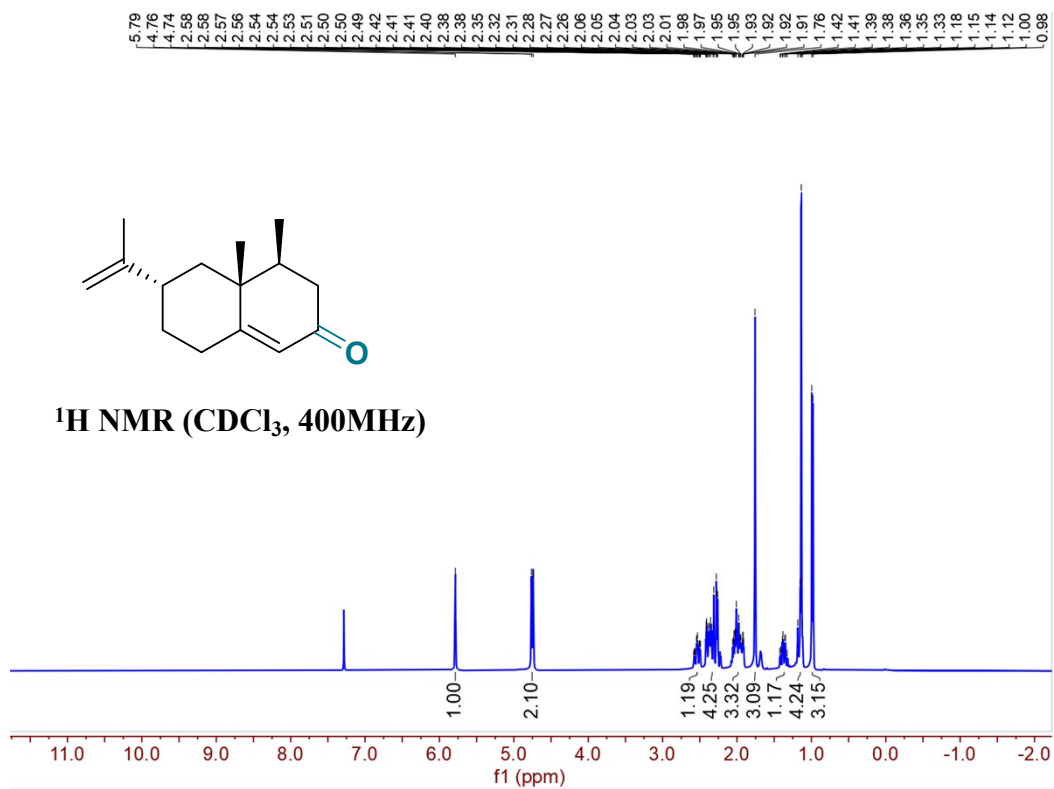

**<sup>1</sup>H NMR Spectrum of Compound 4d**

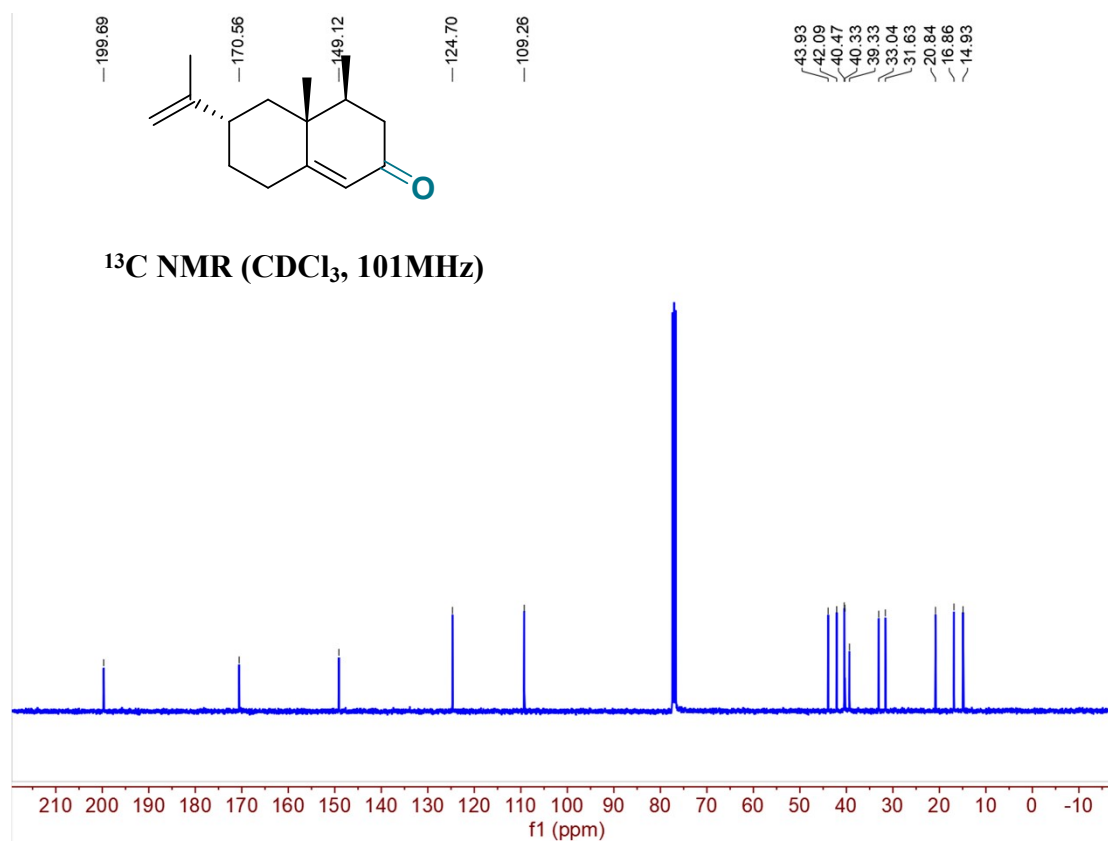

**<sup>13</sup>C NMR Spectrum of Compound 4d**

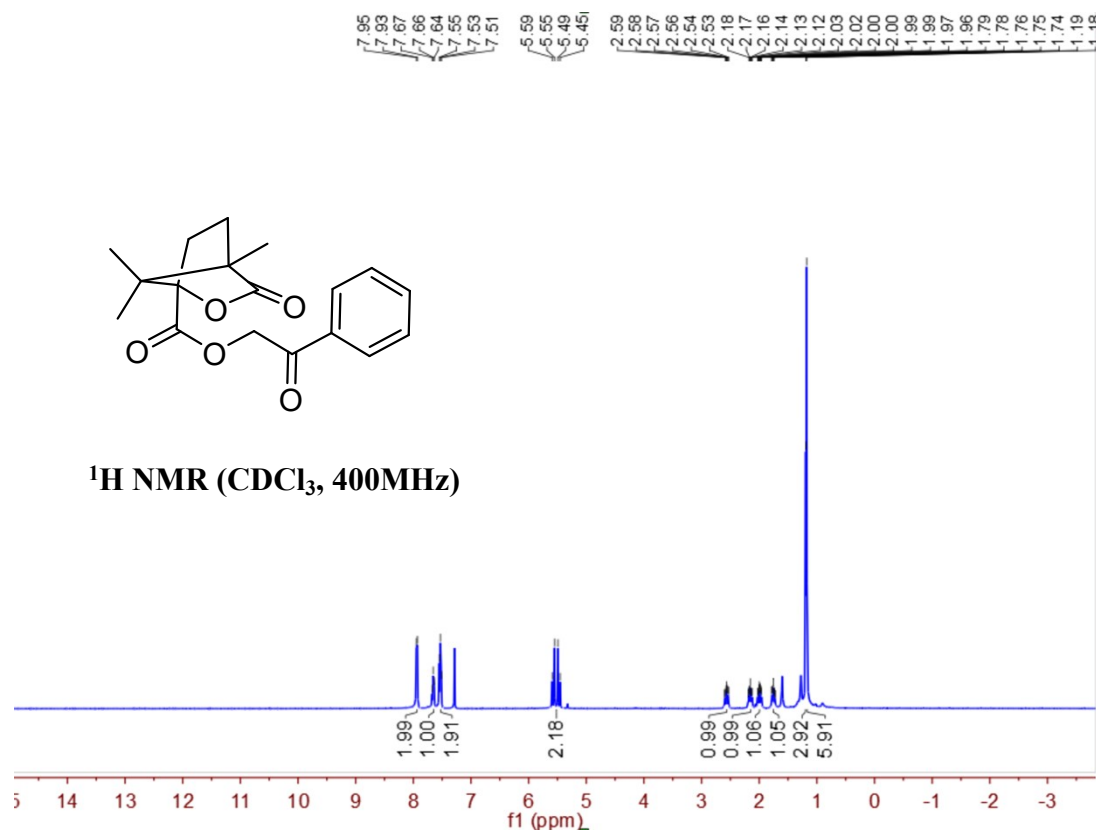

**<sup>1</sup>H NMR Spectrum of Compound 3am**

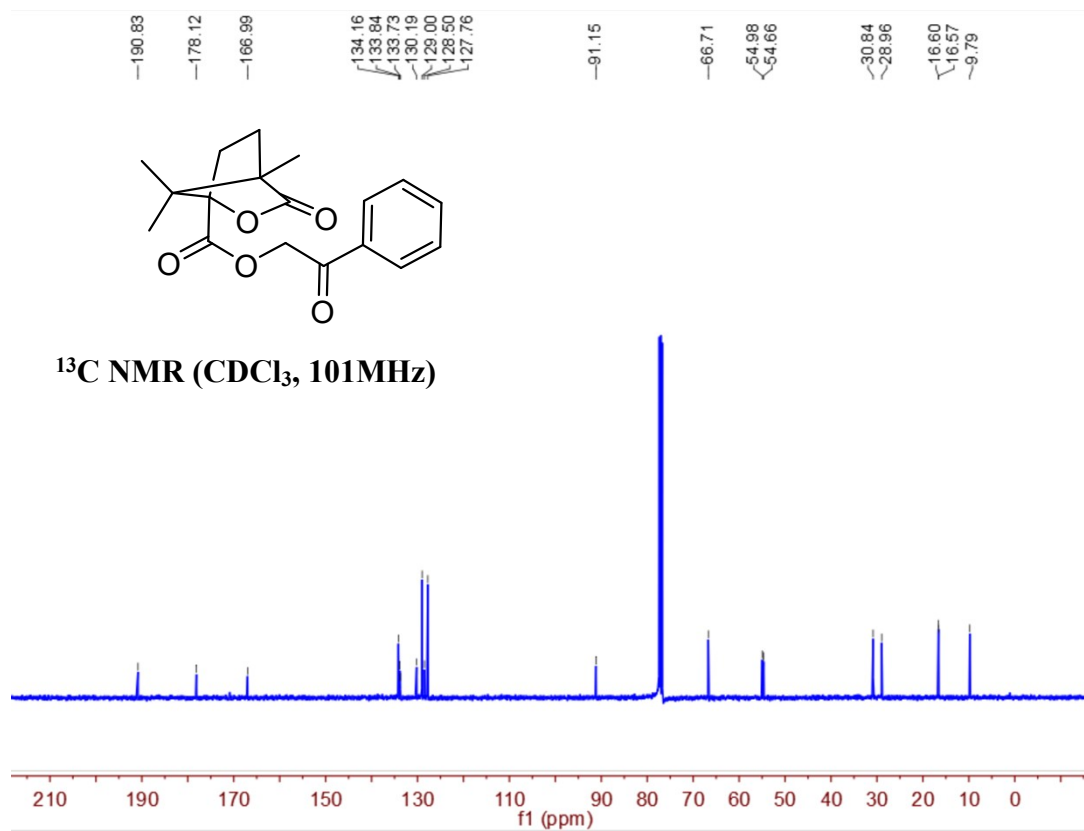

**<sup>13</sup>C NMR Spectrum of Compound 3am**

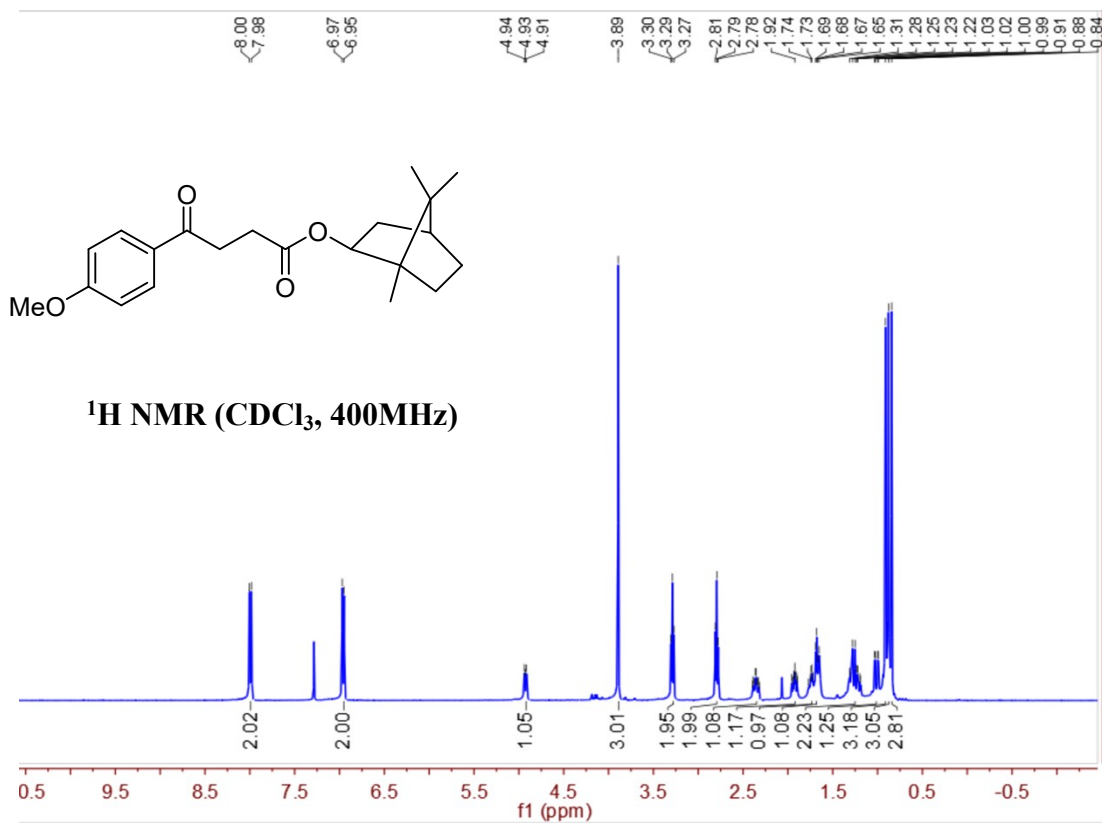

**$^1\text{H}$  NMR Spectrum of Compound 3an**

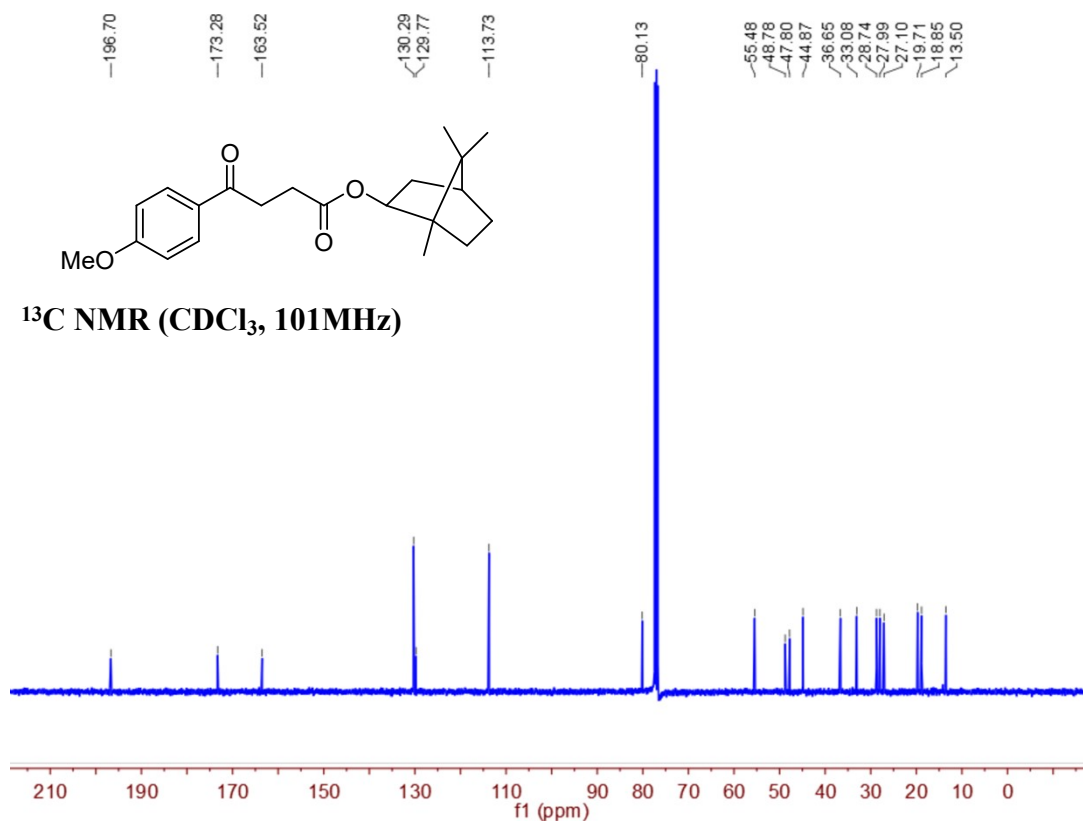

**$^{13}\text{C}$  NMR Spectrum of Compound 3an**



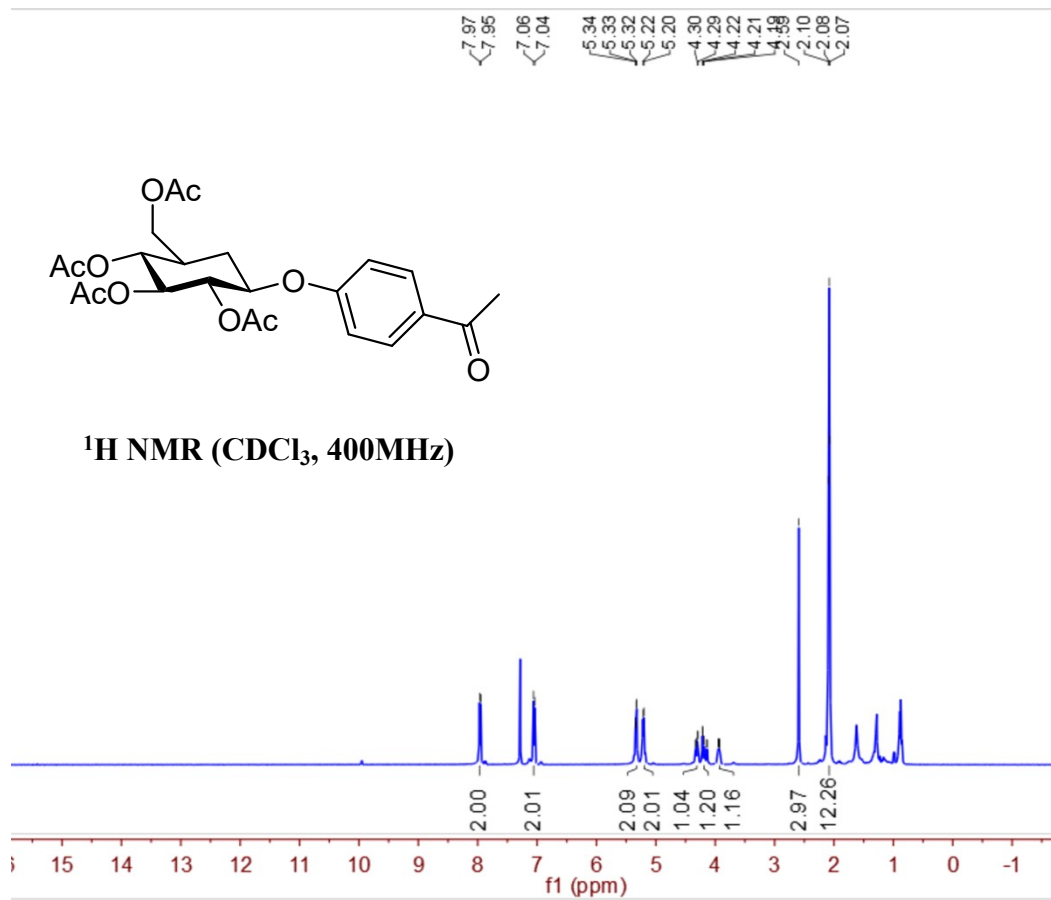

**$^1\text{H NMR}$  Spectrum of Compound 3ao**

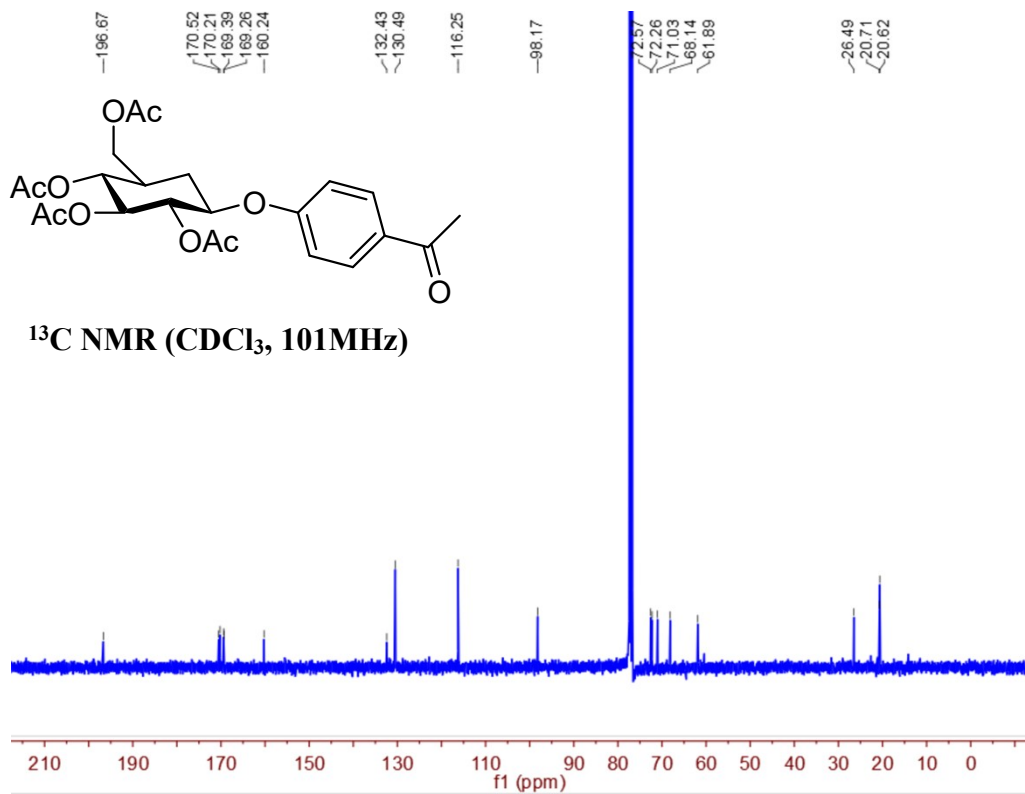

### <sup>13</sup>C NMR Spectrum of Compound 3ao

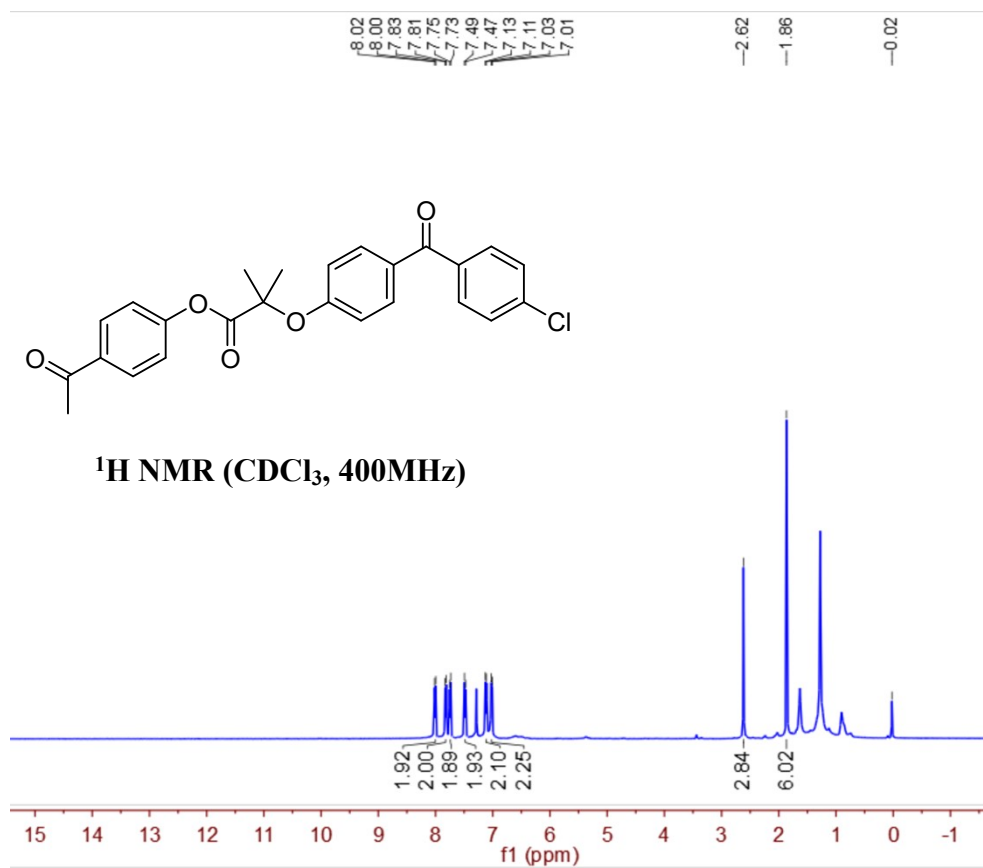

### <sup>1</sup>H NMR Spectrum of Compound 3ap

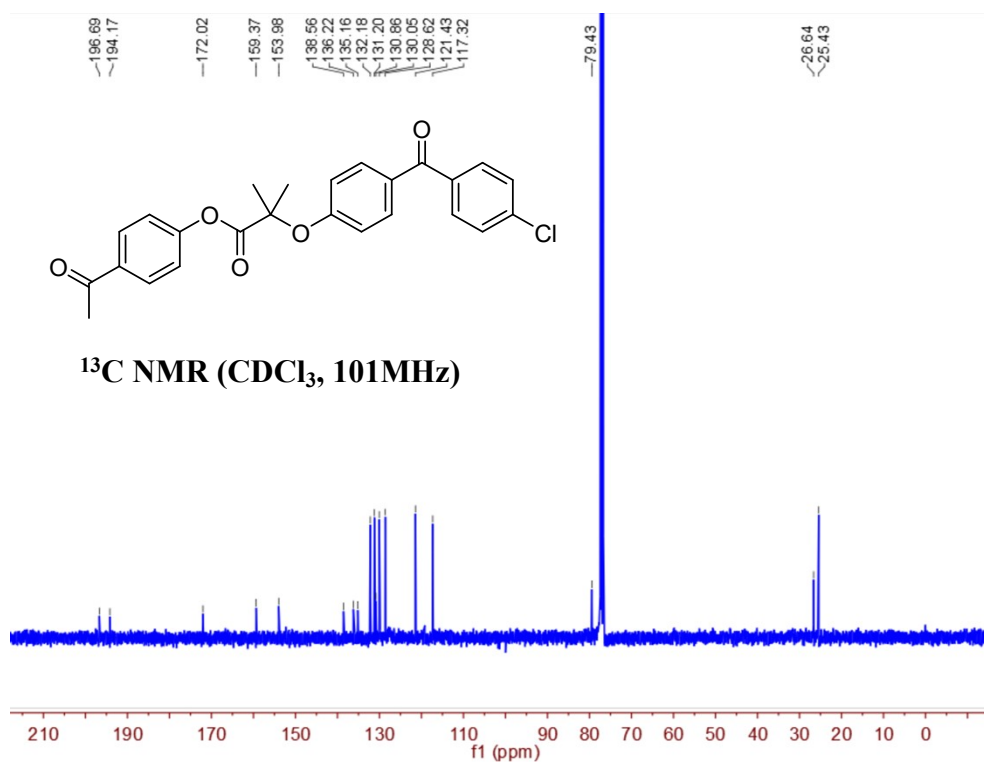

### <sup>13</sup>C NMR Spectrum of Compound 3ap

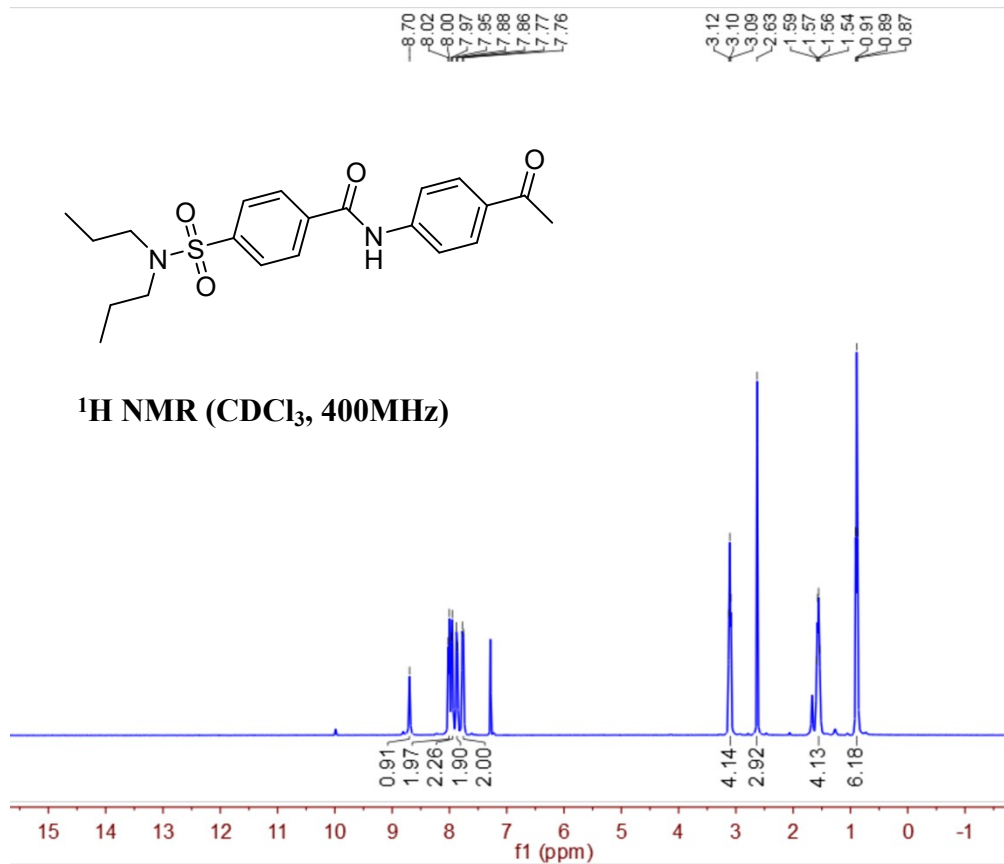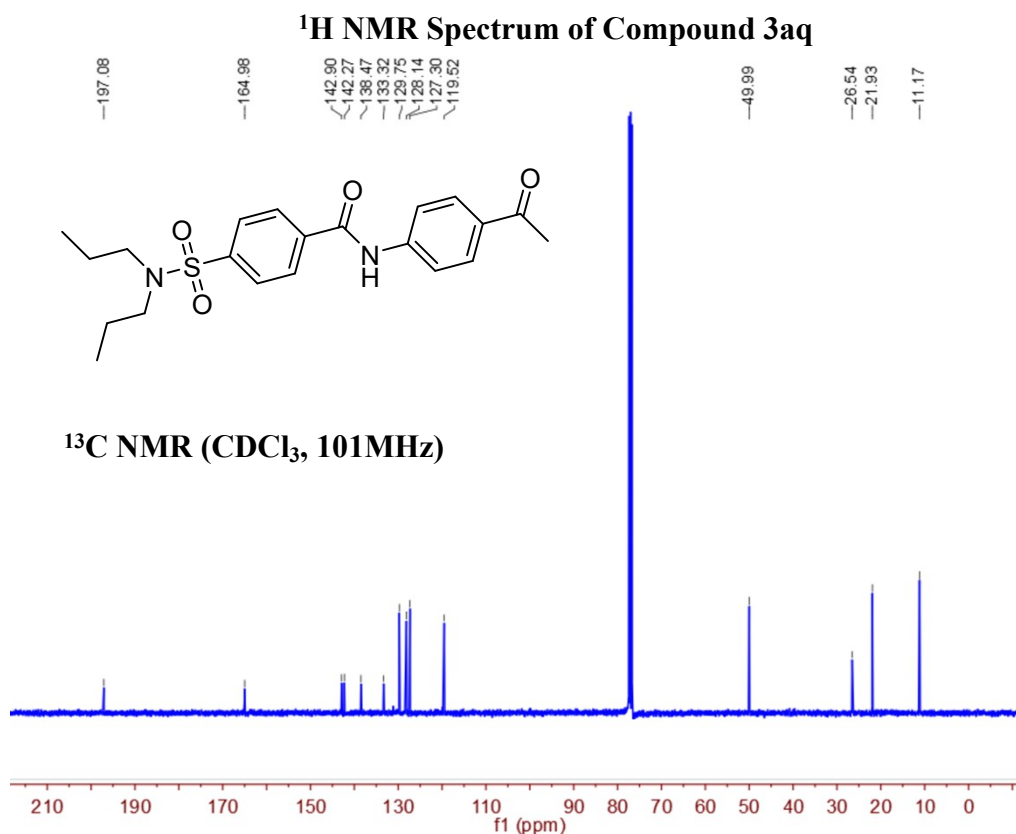

### <sup>13</sup>C NMR Spectrum of Compound 3aq

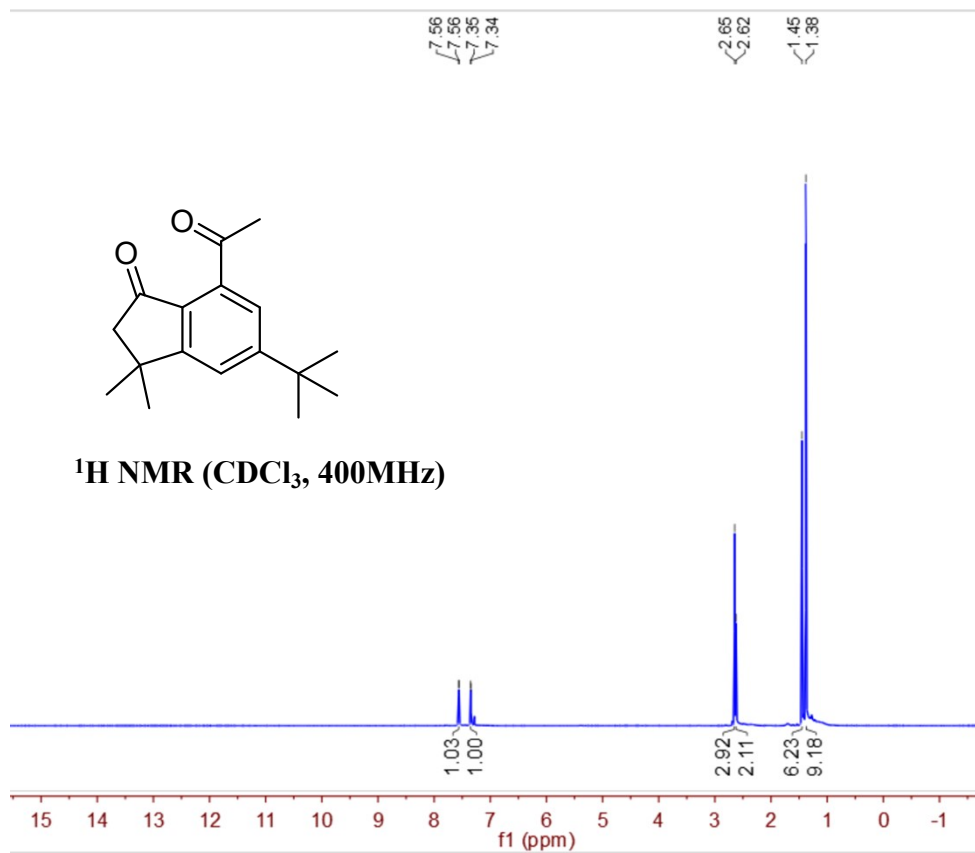

### <sup>1</sup>H NMR Spectrum of Compound 3ar

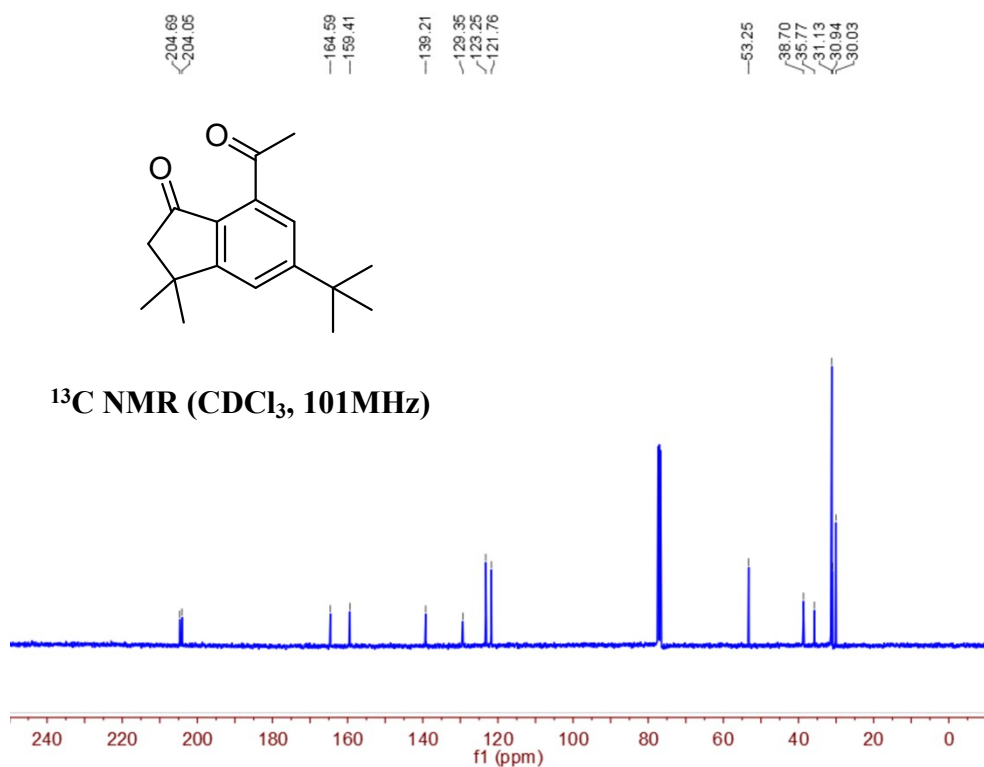

### <sup>13</sup>C NMR Spectrum of Compound 3ar

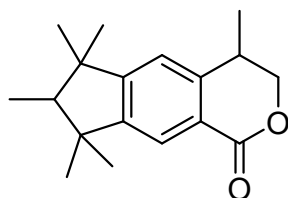

7.93  
7.07  
4.53  
4.51  
4.51  
4.49  
4.26  
4.25  
4.23  
3.16  
1.92  
1.91  
1.89  
1.40  
1.38  
1.32  
1.11  
1.04  
1.03

### <sup>1</sup>H NMR (CDCl<sub>3</sub>, 400MHz)

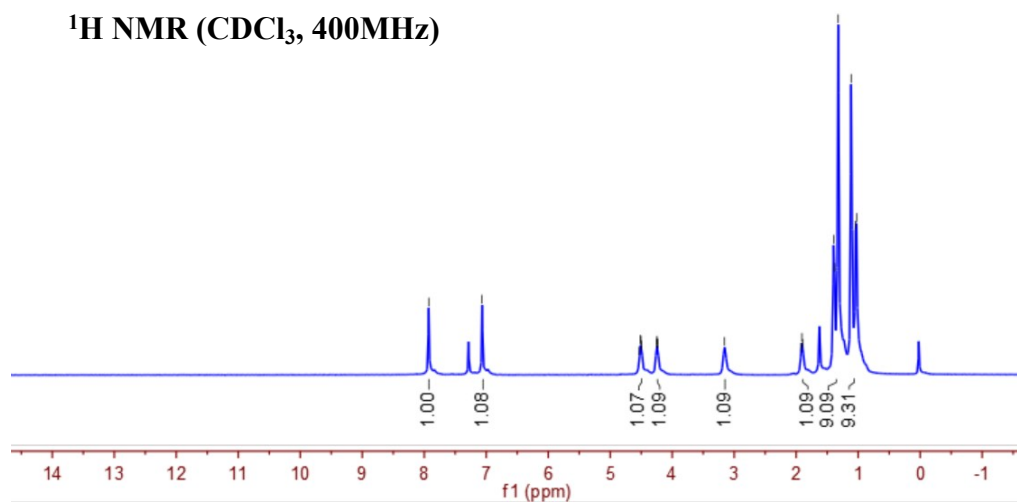

### <sup>1</sup>H NMR Spectrum of Compound 3as

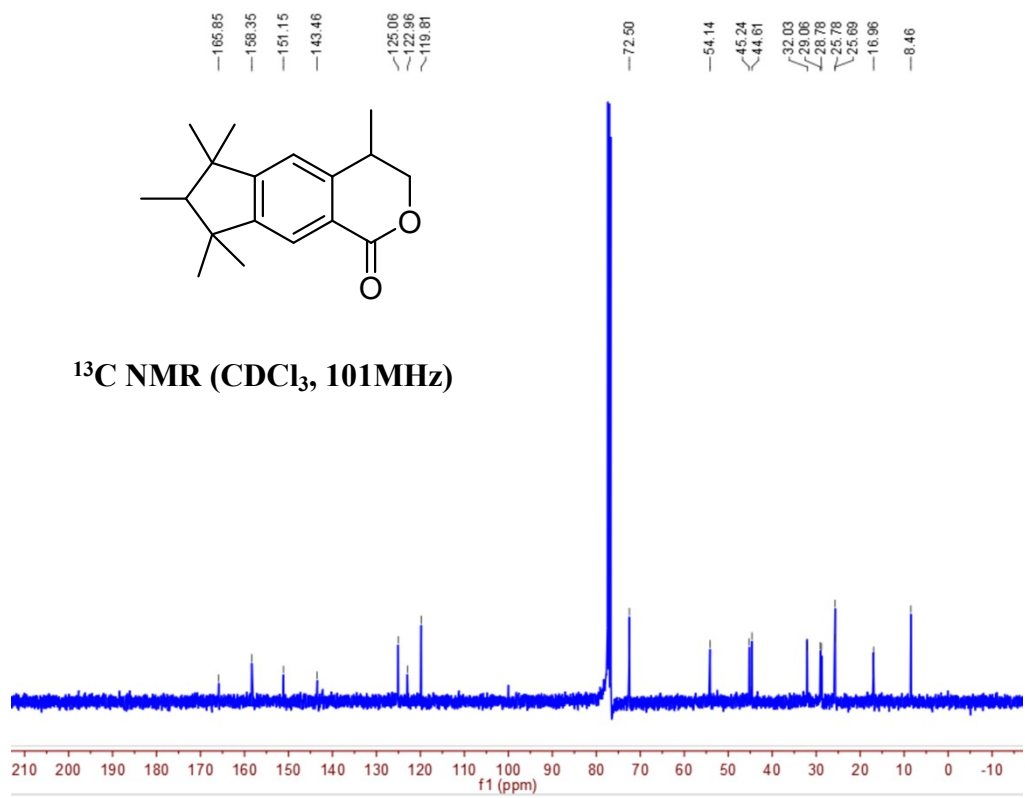

**<sup>13</sup>C NMR Spectrum of Compound 3as**

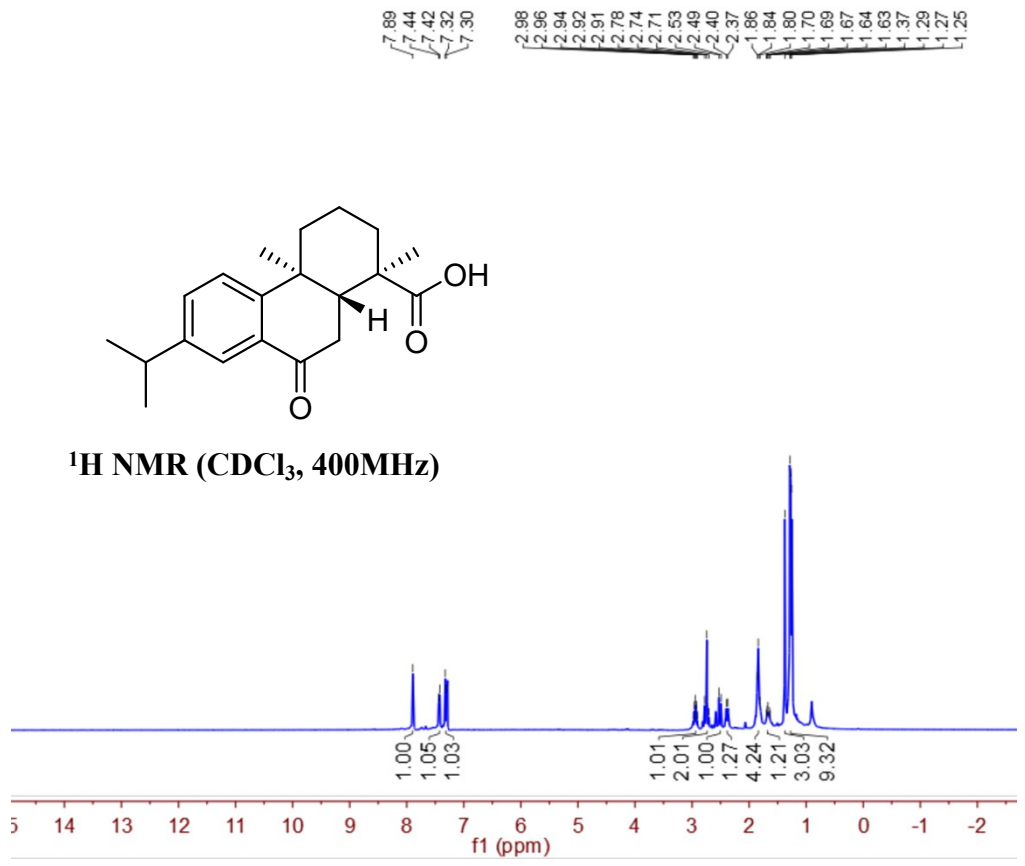

**<sup>1</sup>H NMR Spectrum of Compound 3at**

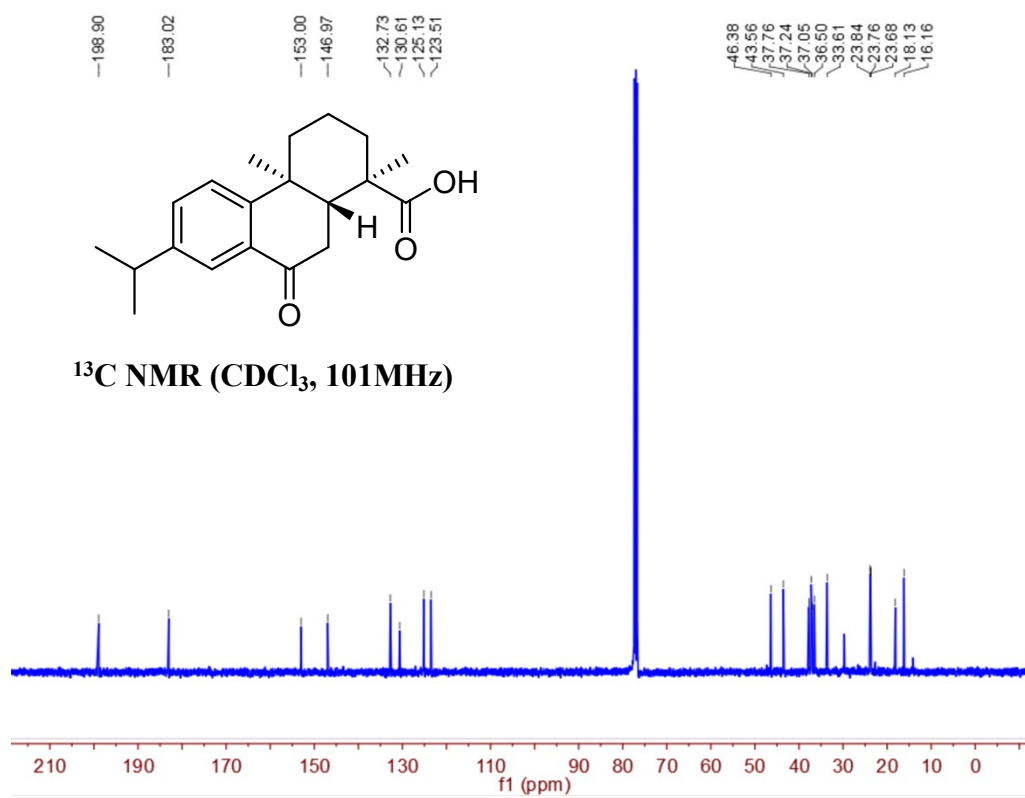

**<sup>13</sup>C NMR Spectrum of Compound 3at**

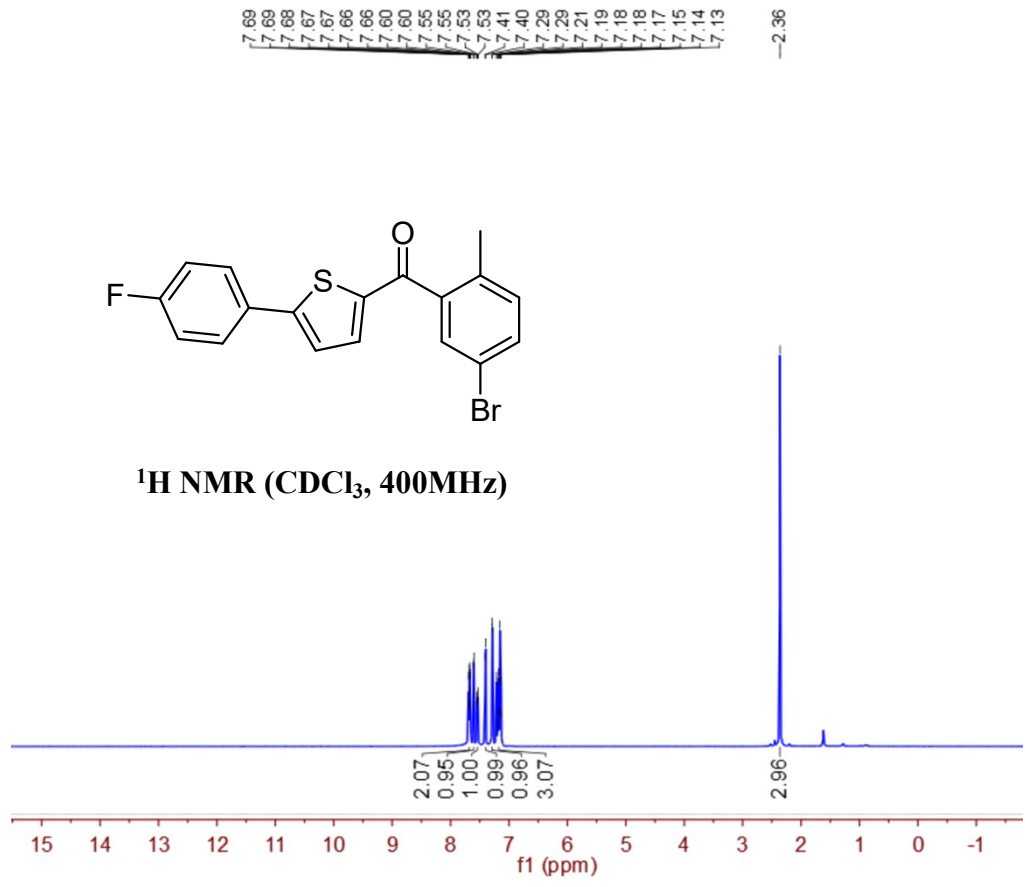

### <sup>1</sup>H NMR Spectrum of Compound 3au

Chemical structure of Compound 3au is shown above the spectrum. The structure is a 4-fluorophenyl group attached to a thiophene ring, which is further attached to a carbonyl group, and finally to a 4-bromophenyl group. The chemical structure is: Cc1ccc(Br)cc1C(=O)c2cc(sc2-c3ccc(F)cc3)

### <sup>13</sup>C NMR (CDCl<sub>3</sub>, 101MHz)

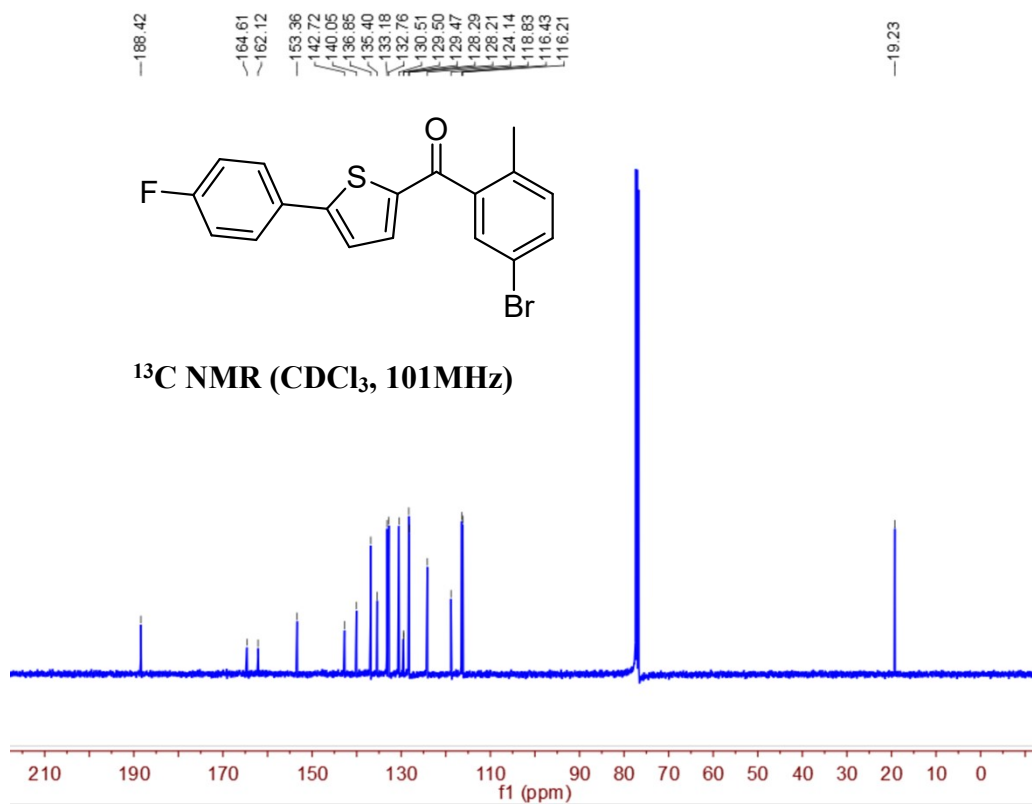

### <sup>13</sup>C NMR Spectrum of Compound 3au

Chemical structure of Compound 3au is shown above the spectrum. The structure is a complex bicyclic system with a methyl group on the nitrogen, a methoxy group on the benzene ring, and a carbonyl group. The chemical structure is: CN1[C@H]2CC[C@@H]1C(=O)c3ccc(OC)cc3

### <sup>1</sup>H NMR (CDCl<sub>3</sub>, 400MHz)

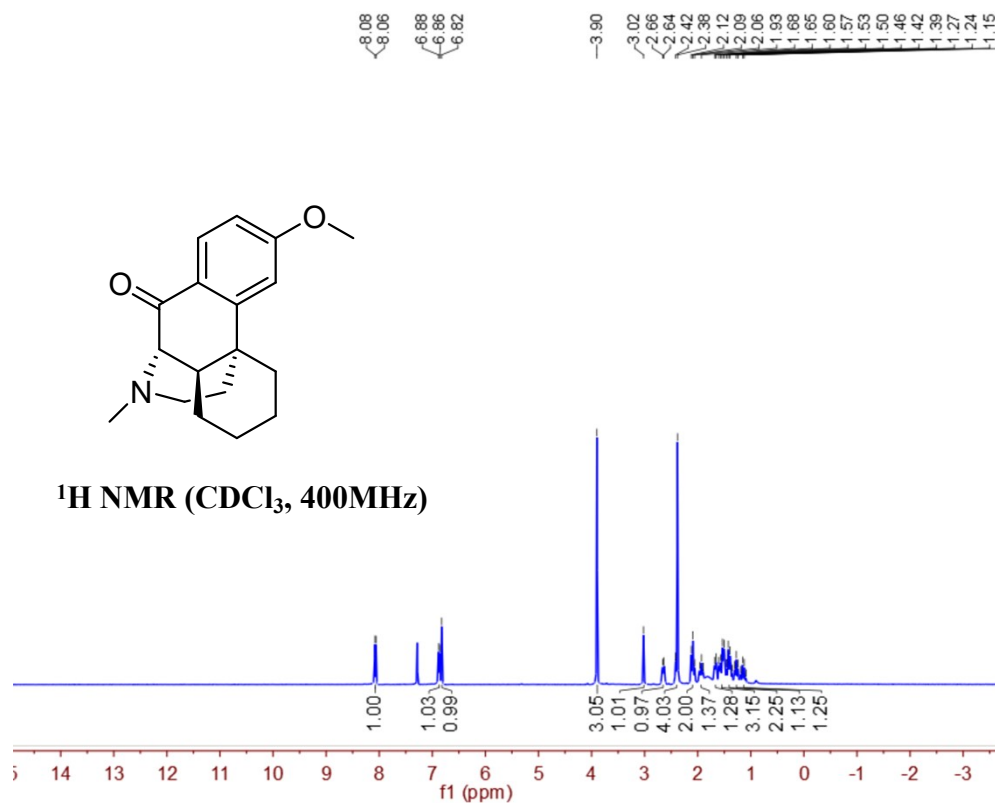



### <sup>1</sup>H NMR Spectrum of Compound 3av

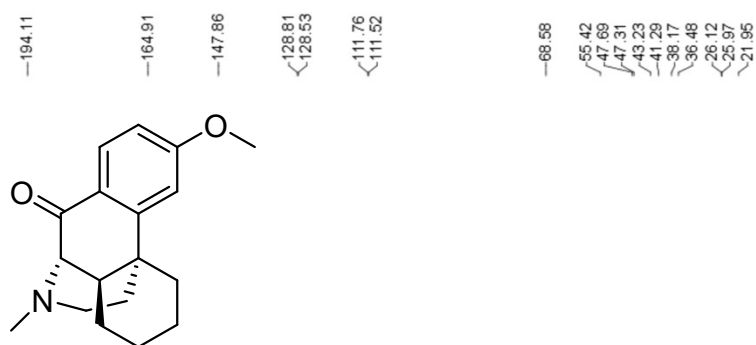

### <sup>13</sup>C NMR (CDCl<sub>3</sub>, 101MHz)

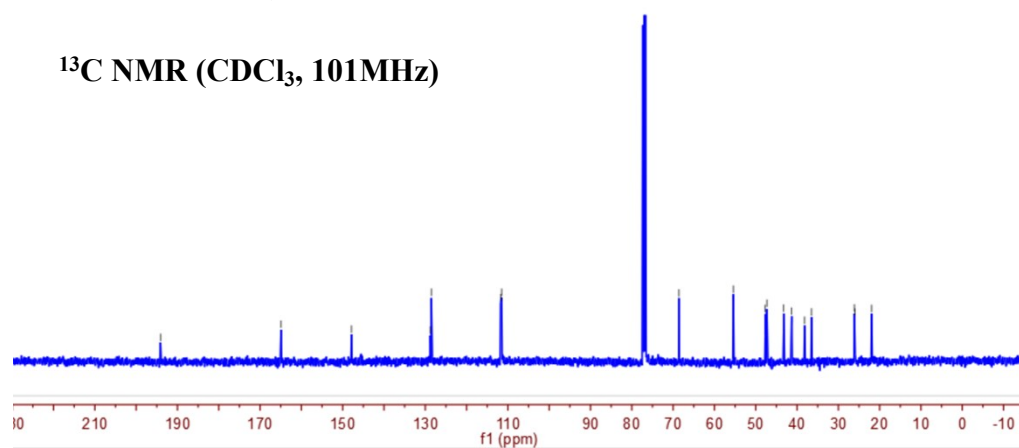

### <sup>13</sup>C NMR Spectrum of Compound 3av

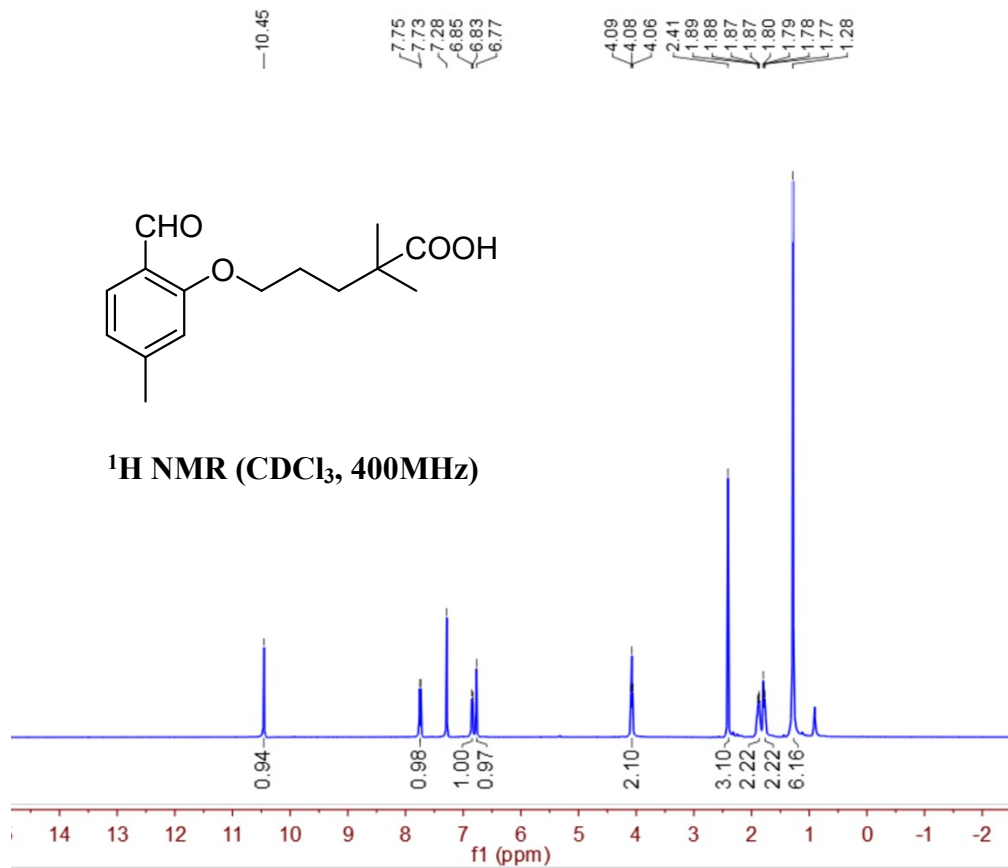

**$^1\text{H NMR}$  Spectrum of Compound 3aw**

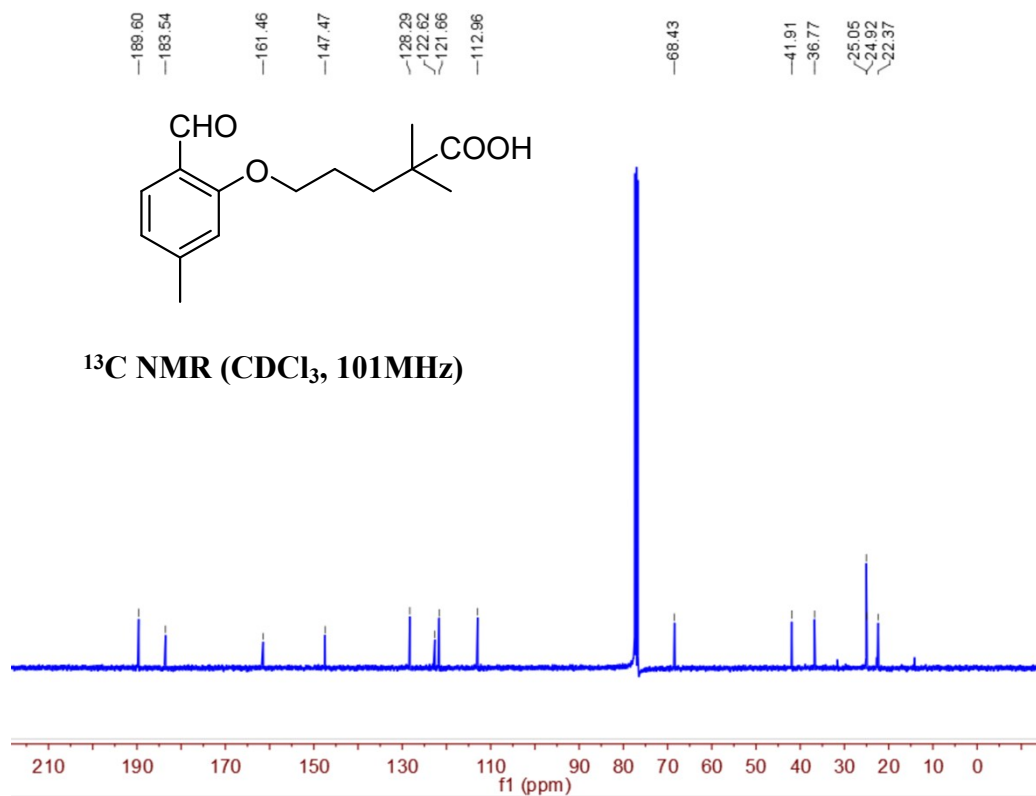

**$^{13}\text{C NMR}$  Spectrum of Compound 3aw**

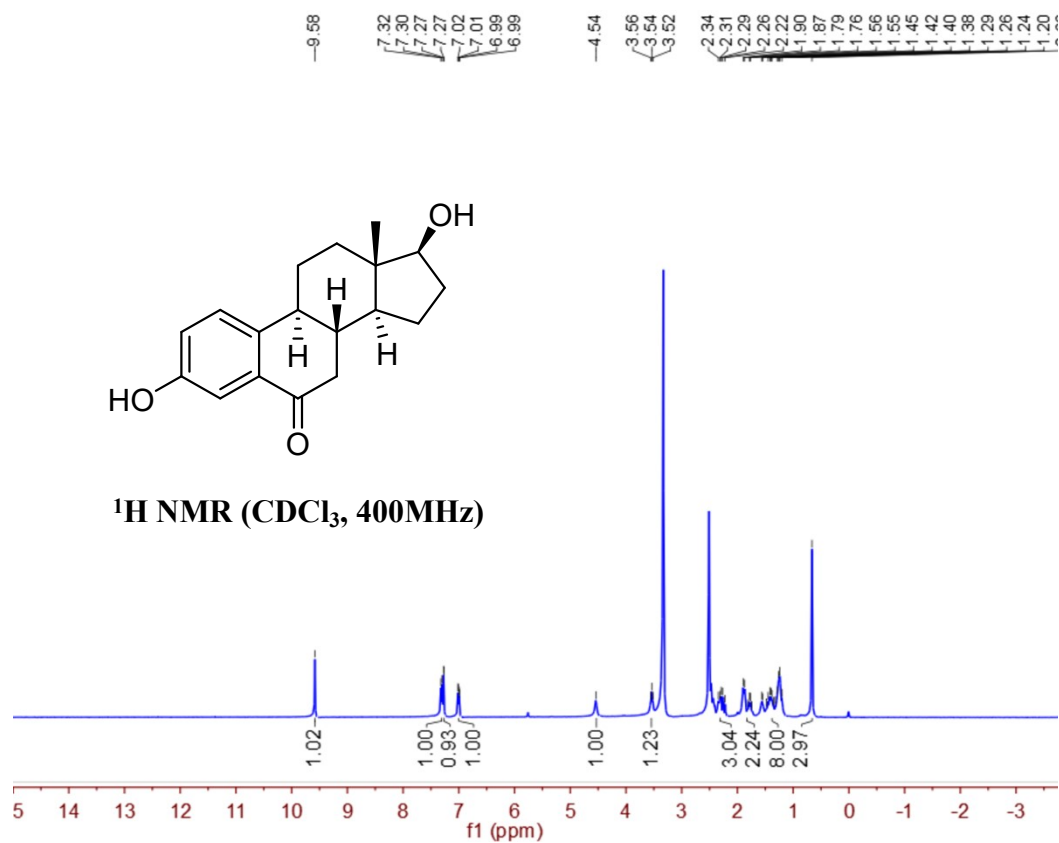

$^1\text{H}$  NMR Spectrum of Compound 3ax

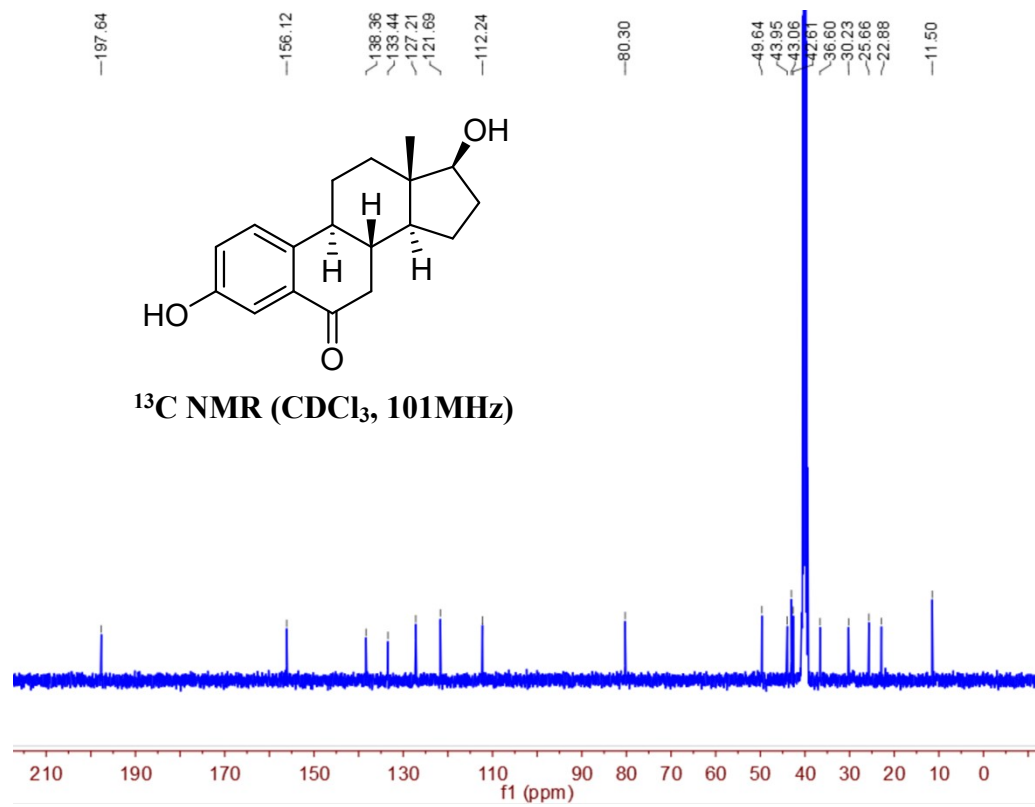

### <sup>13</sup>C NMR Spectrum of Compound 3ax

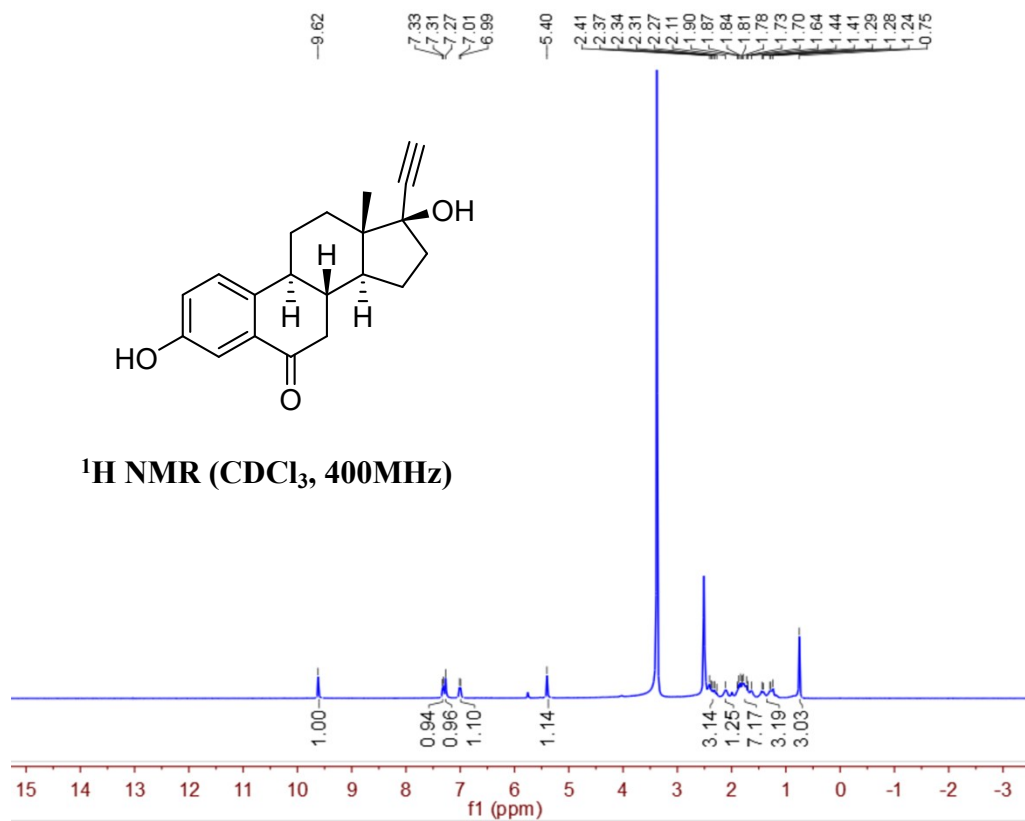

### <sup>1</sup>H NMR Spectrum of Compound 3ay

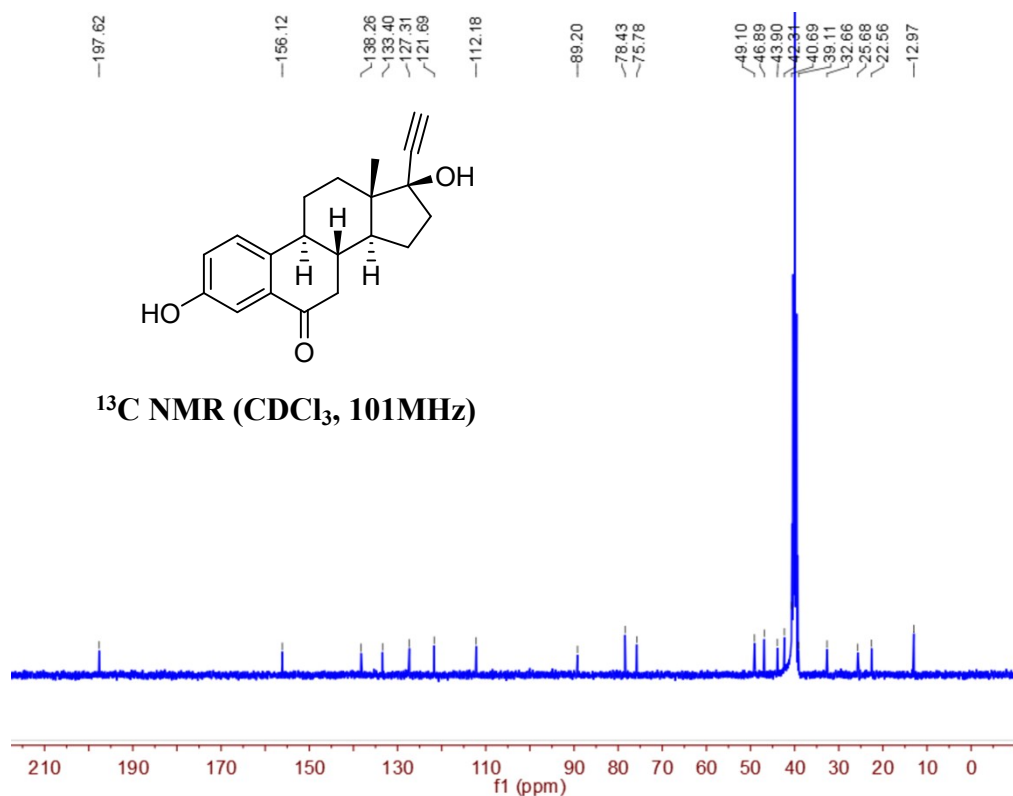

### <sup>13</sup>C NMR Spectrum of Compound 3ay

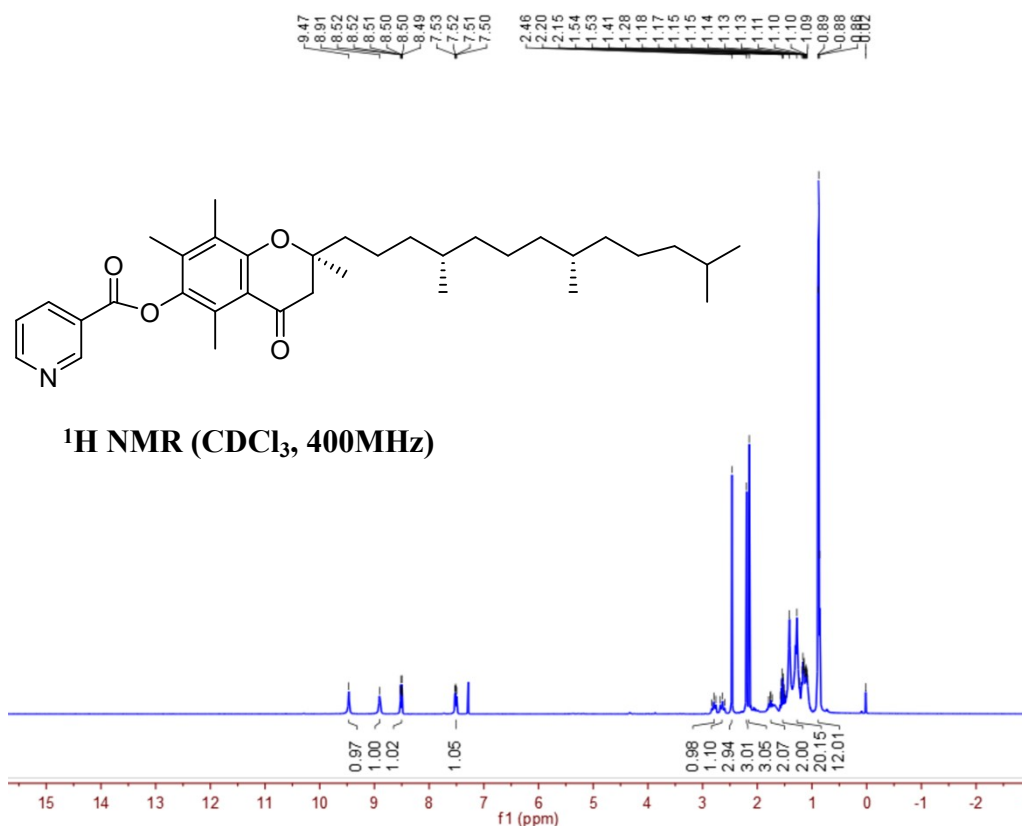

### <sup>1</sup>H NMR Spectrum of Compound 3az

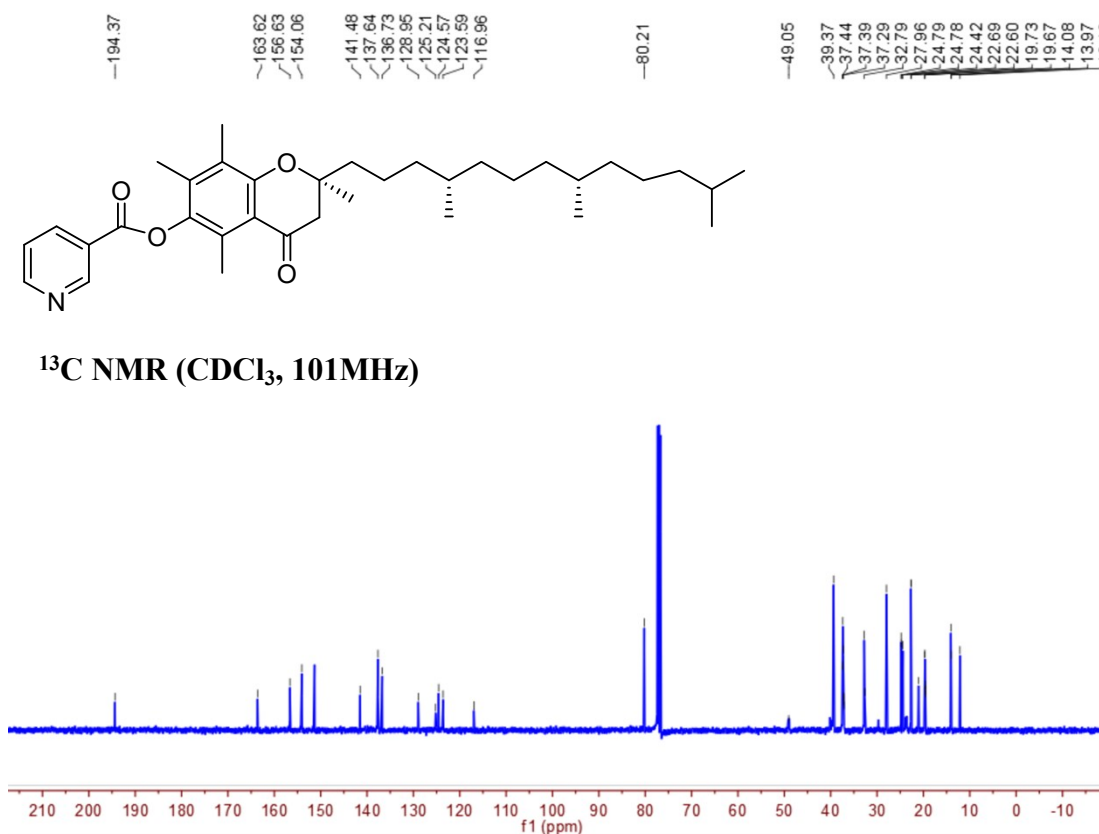

### <sup>13</sup>C NMR Spectrum of Compound 3az

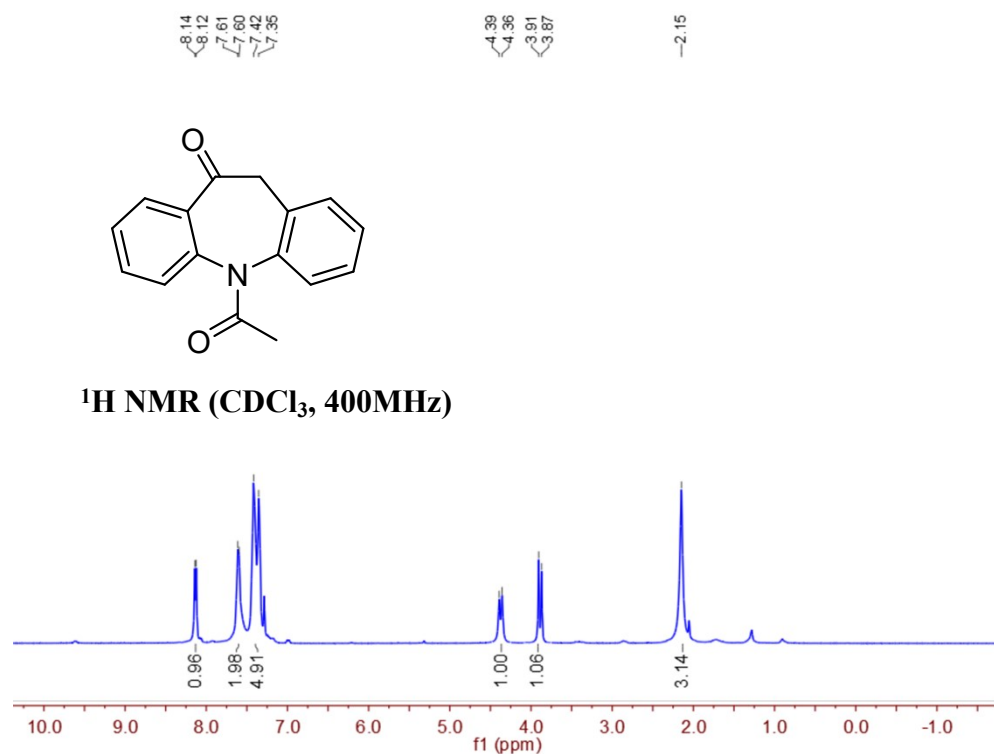

### <sup>13</sup>C NMR Spectrum of Compound 3ba

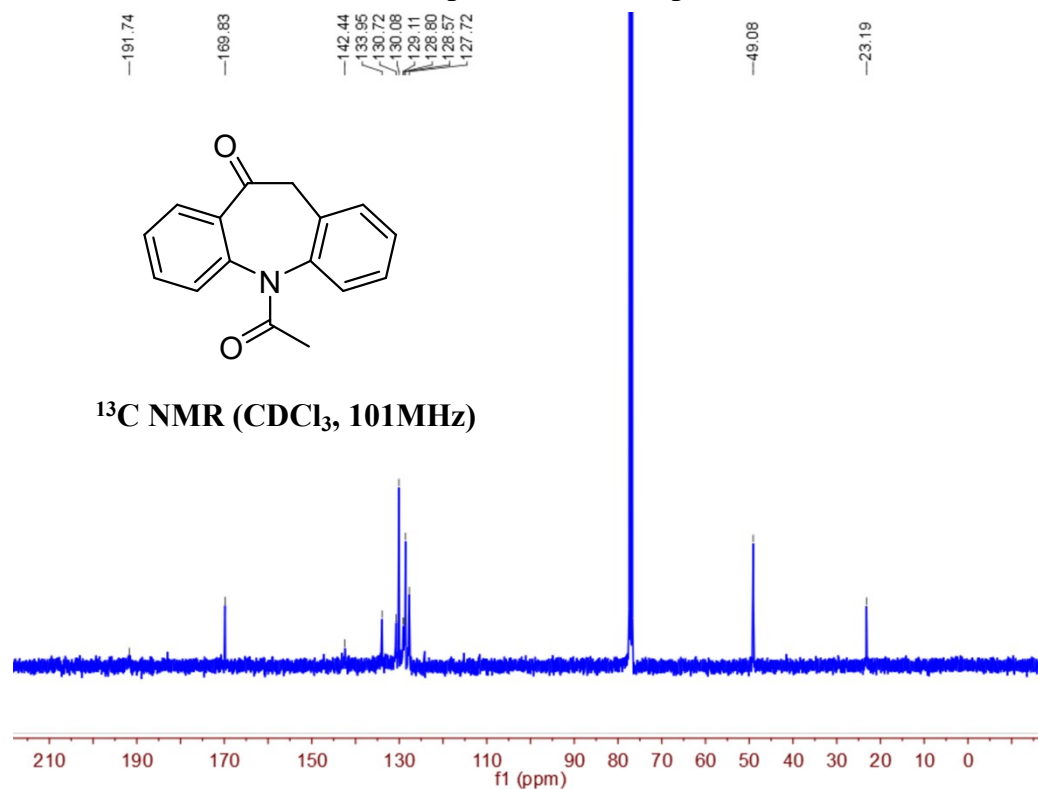

### <sup>13</sup>C NMR Spectrum of Compound 3ba

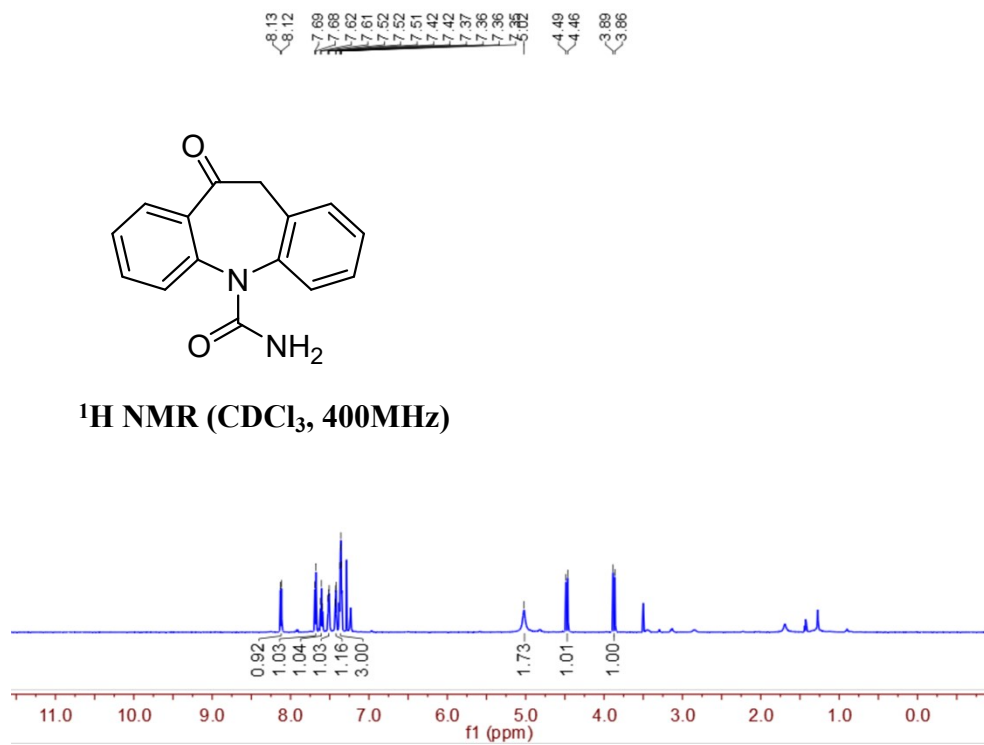

<sup>1</sup>H NMR Spectrum of Compound 3bb

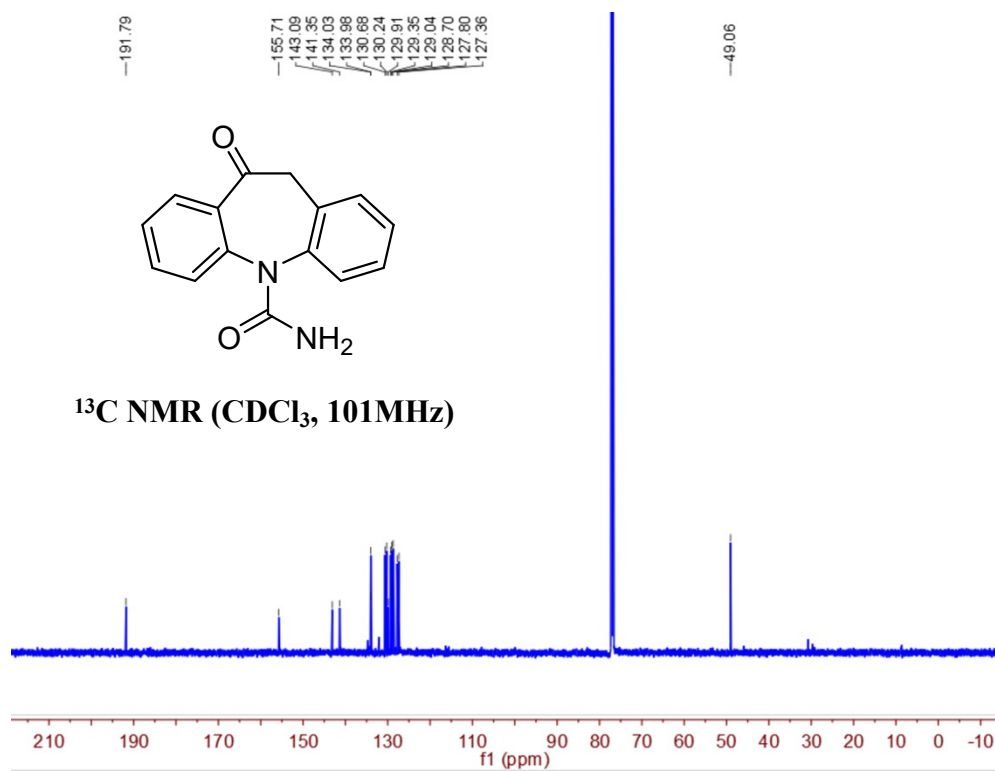

<sup>13</sup>C NMR Spectrum of Compound 3bb

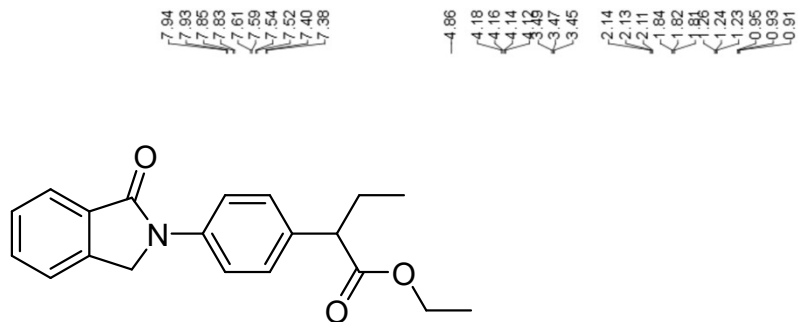

**<sup>1</sup>H NMR (CDCl<sub>3</sub>, 400MHz)**

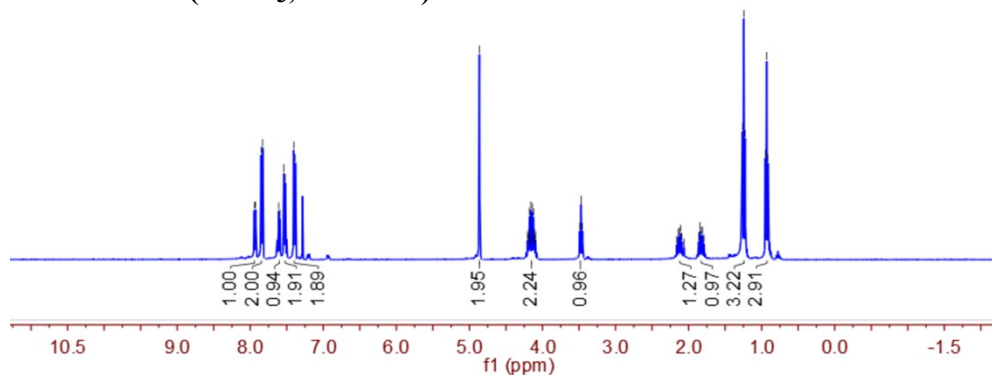

**<sup>1</sup>H NMR Spectrum of Compound 3bc**

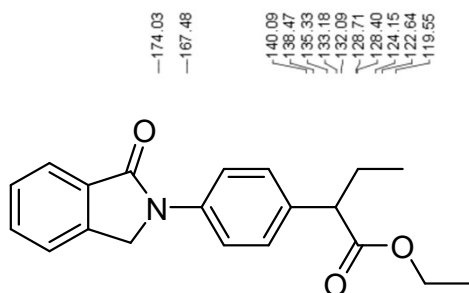

**<sup>13</sup>C NMR (CDCl<sub>3</sub>, 101MHz)**

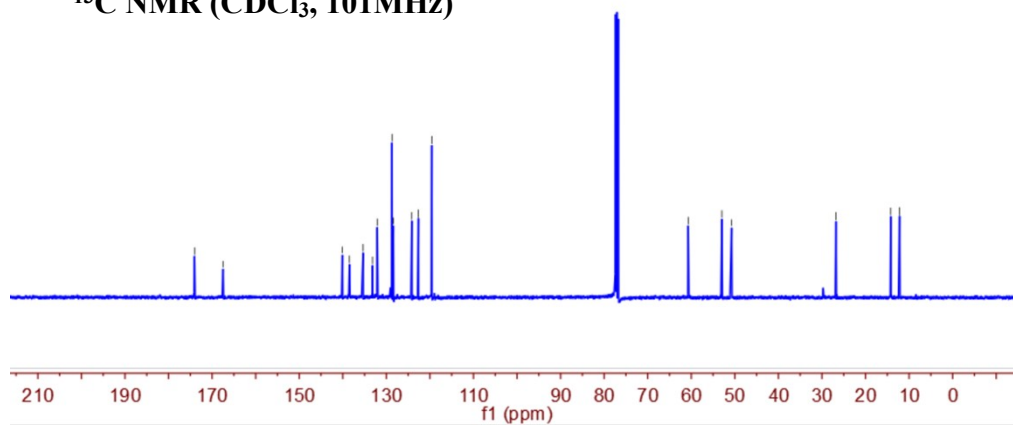

**<sup>13</sup>C NMR Spectrum of Compound 3bc**



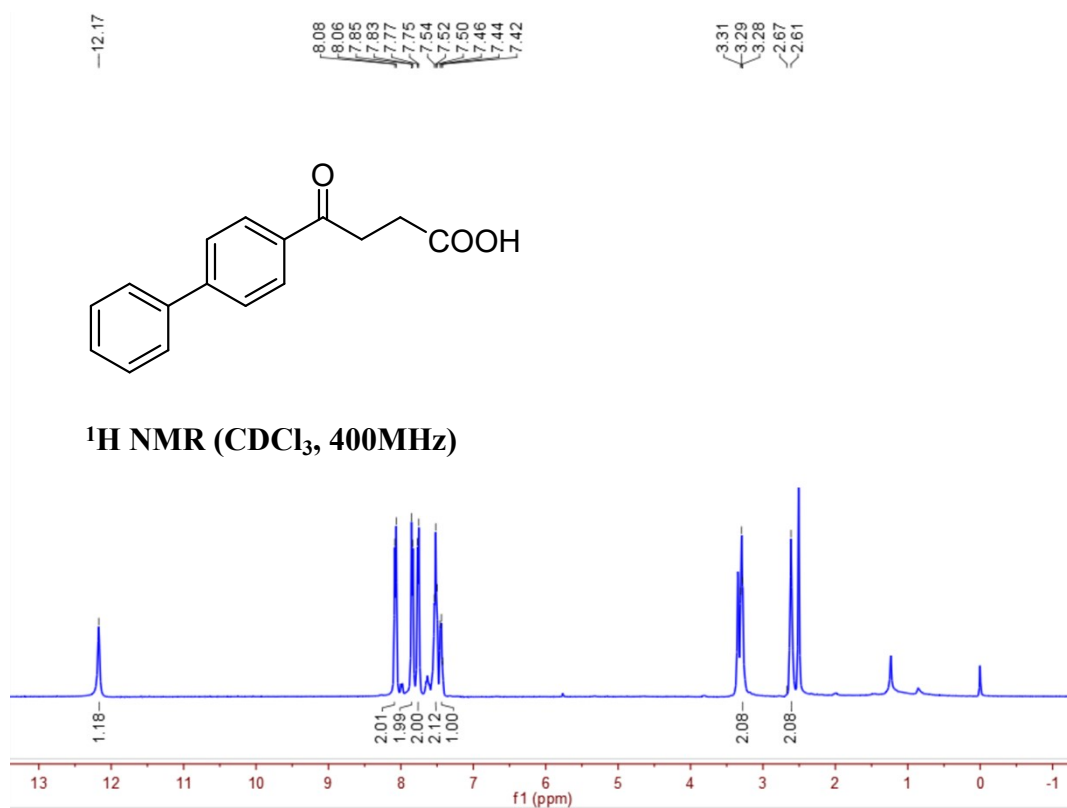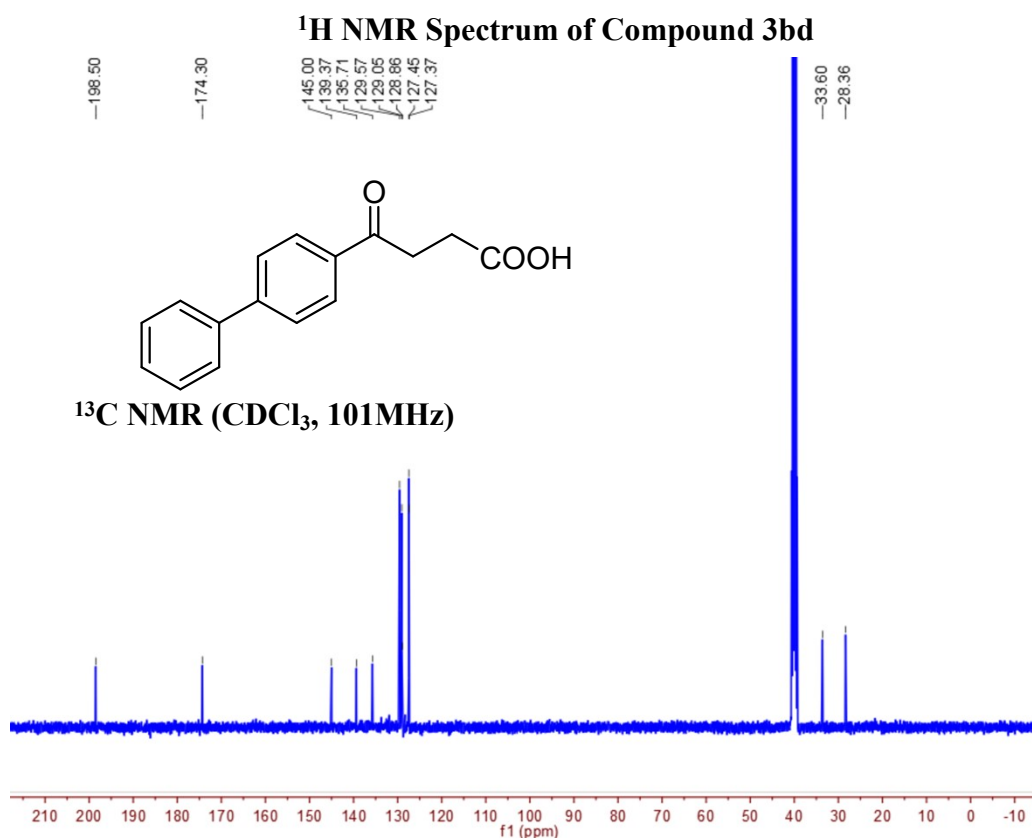

**<sup>13</sup>C NMR Spectrum of Compound 3bd**

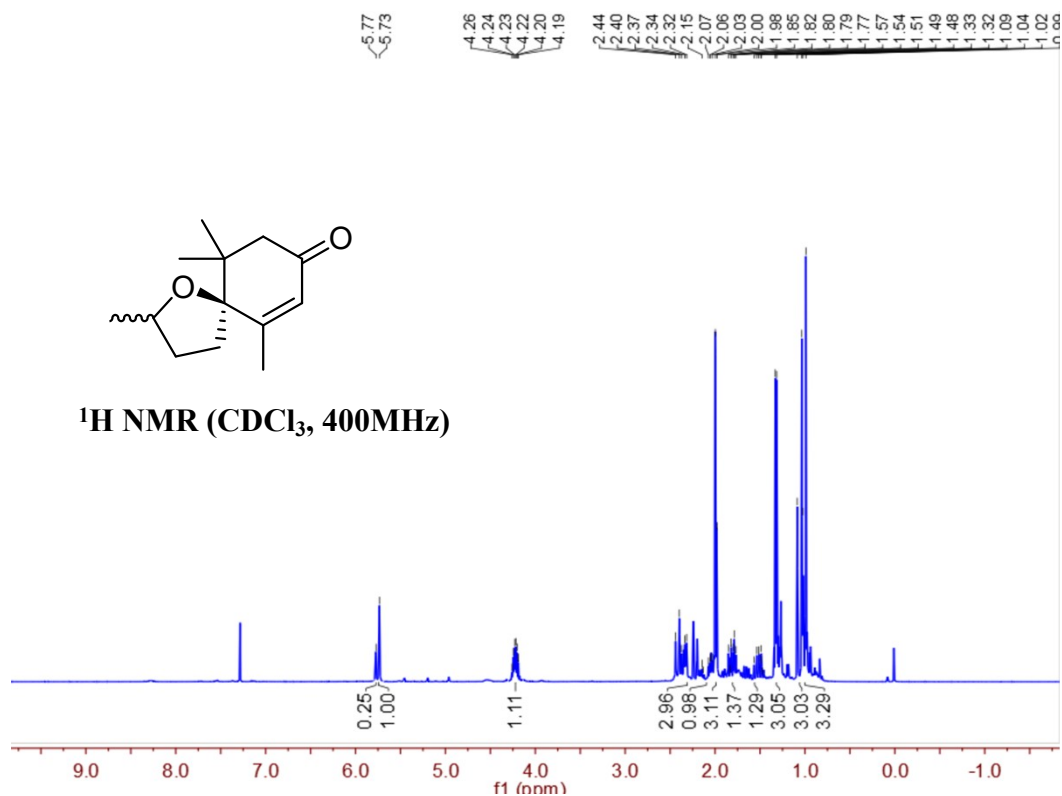

**<sup>1</sup>H NMR Spectrum of Compound 4e**

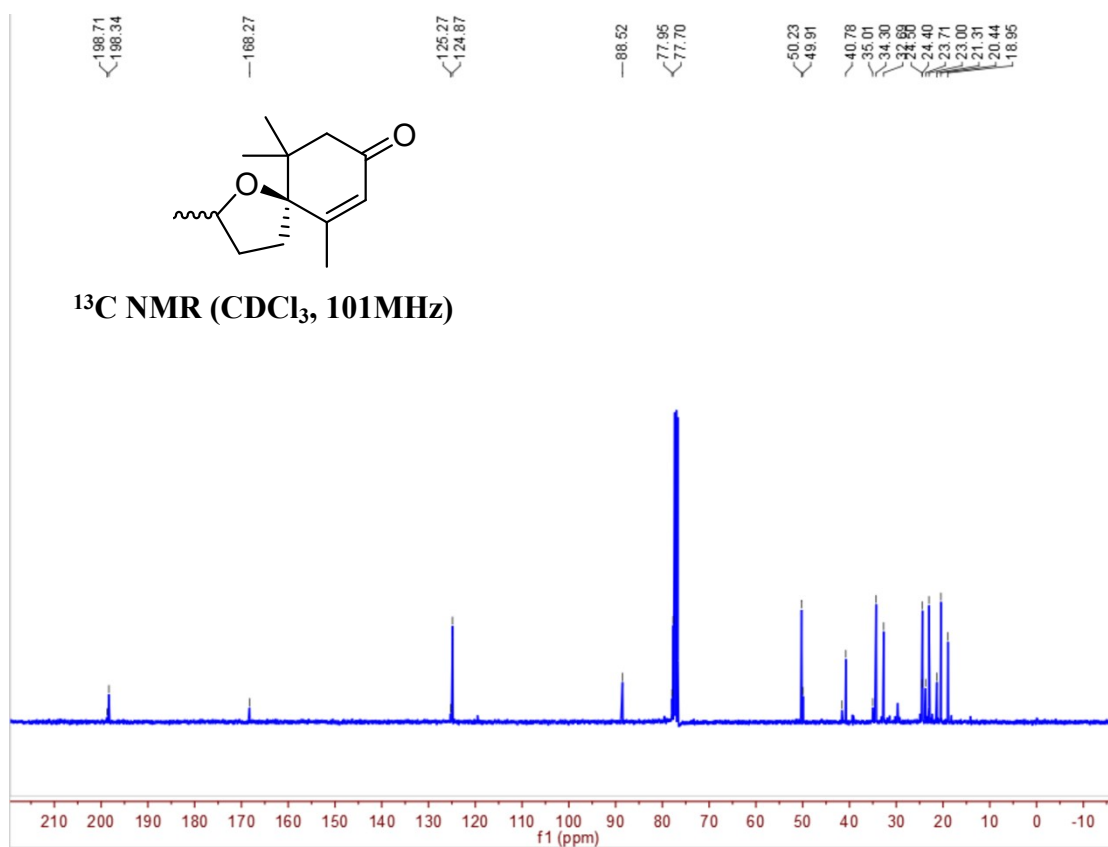

**<sup>13</sup>C NMR Spectrum of Compound 4e**

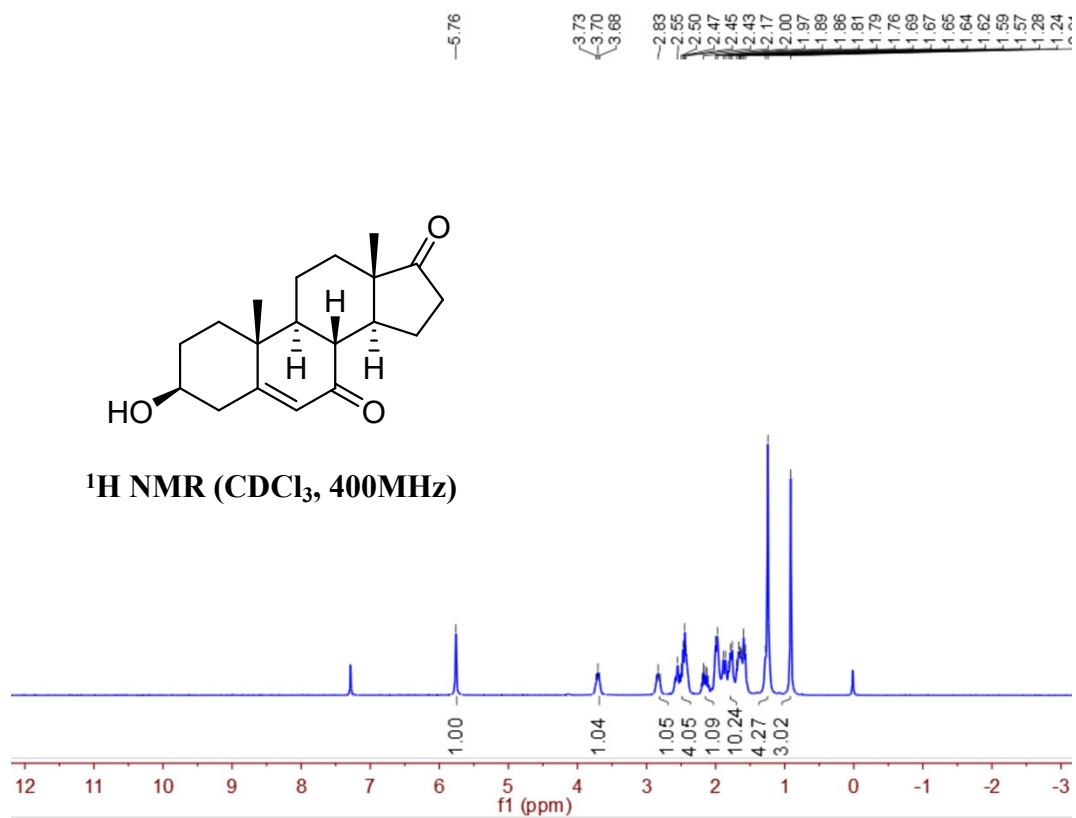

$^1\text{H}$  NMR Spectrum of Compound 4f

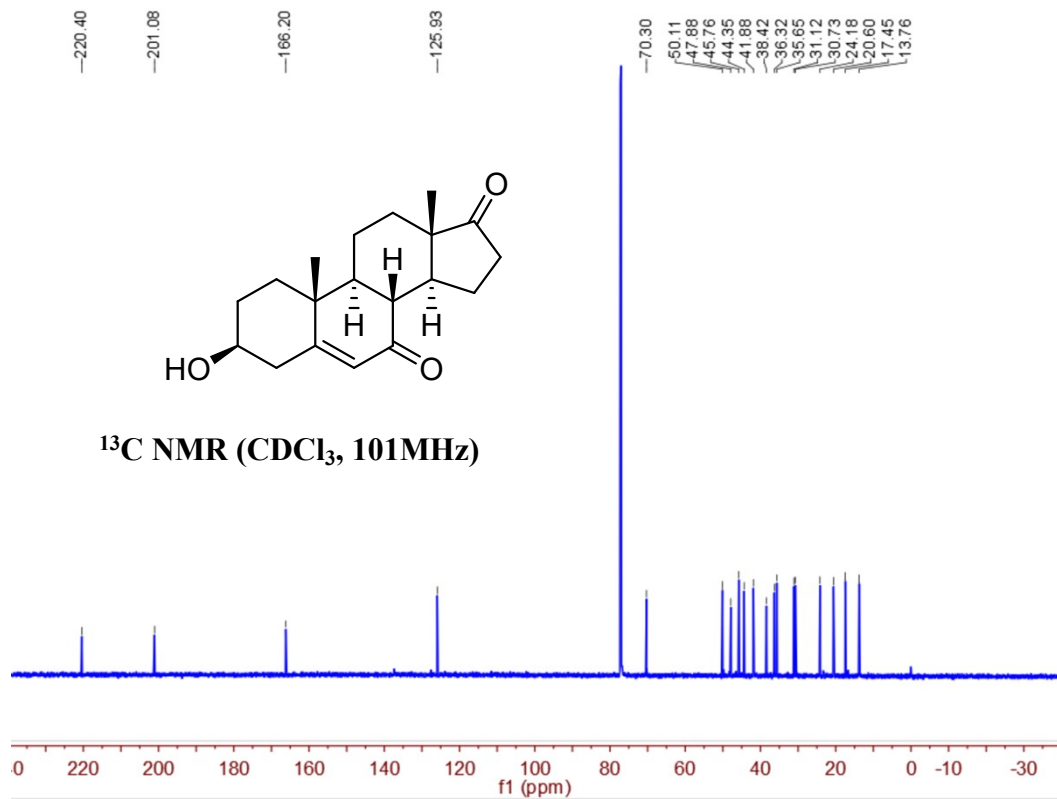

$^{13}\text{C}$  NMR Spectrum of Compound 4f

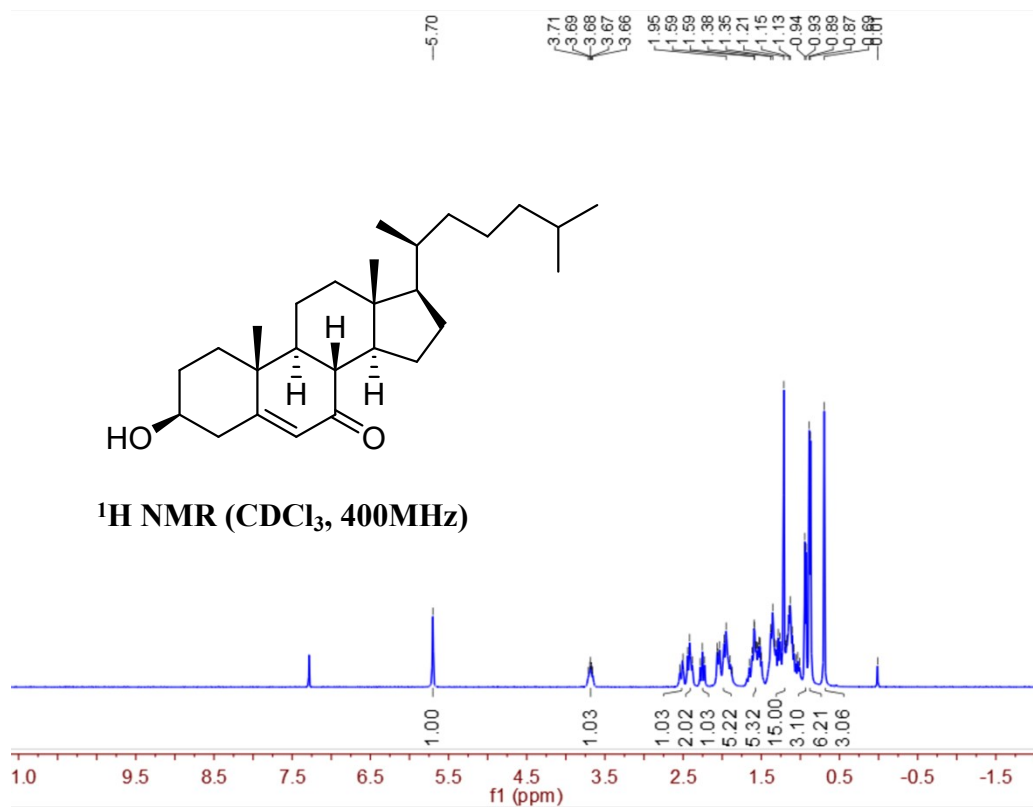

$^1\text{H}$  NMR Spectrum of Compound 4g

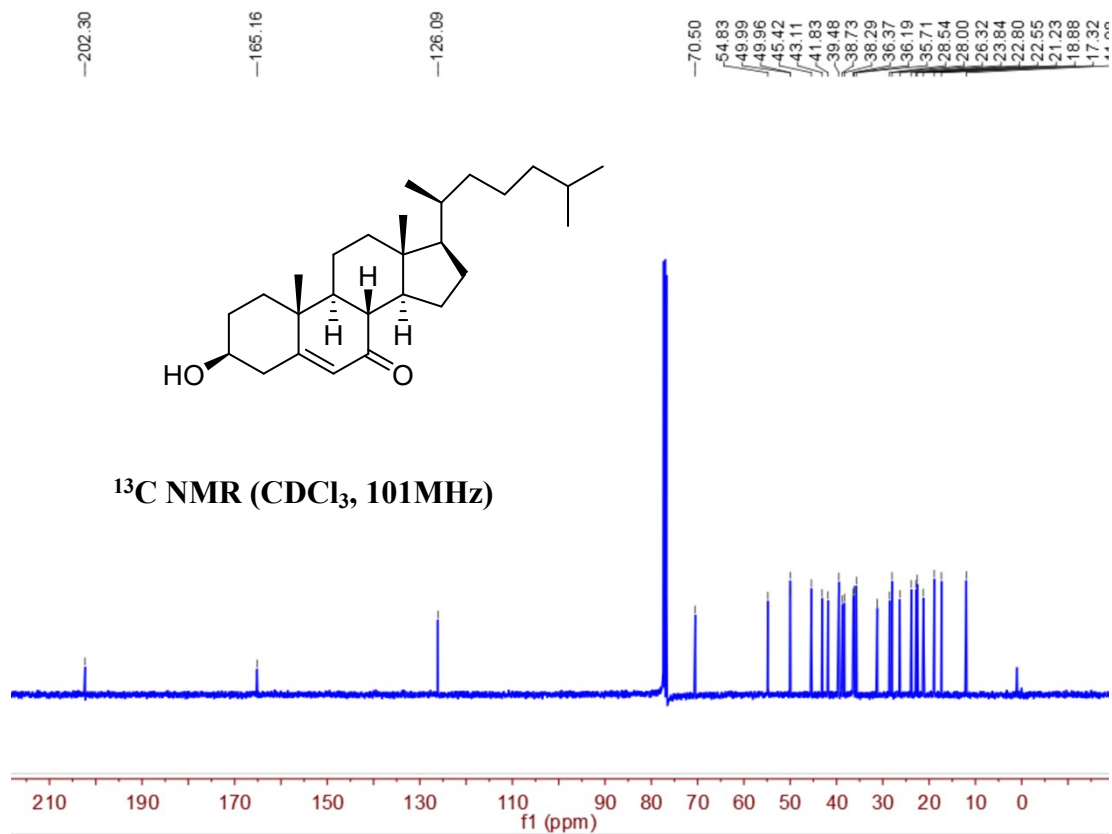

### <sup>13</sup>C NMR Spectrum of Compound 4g

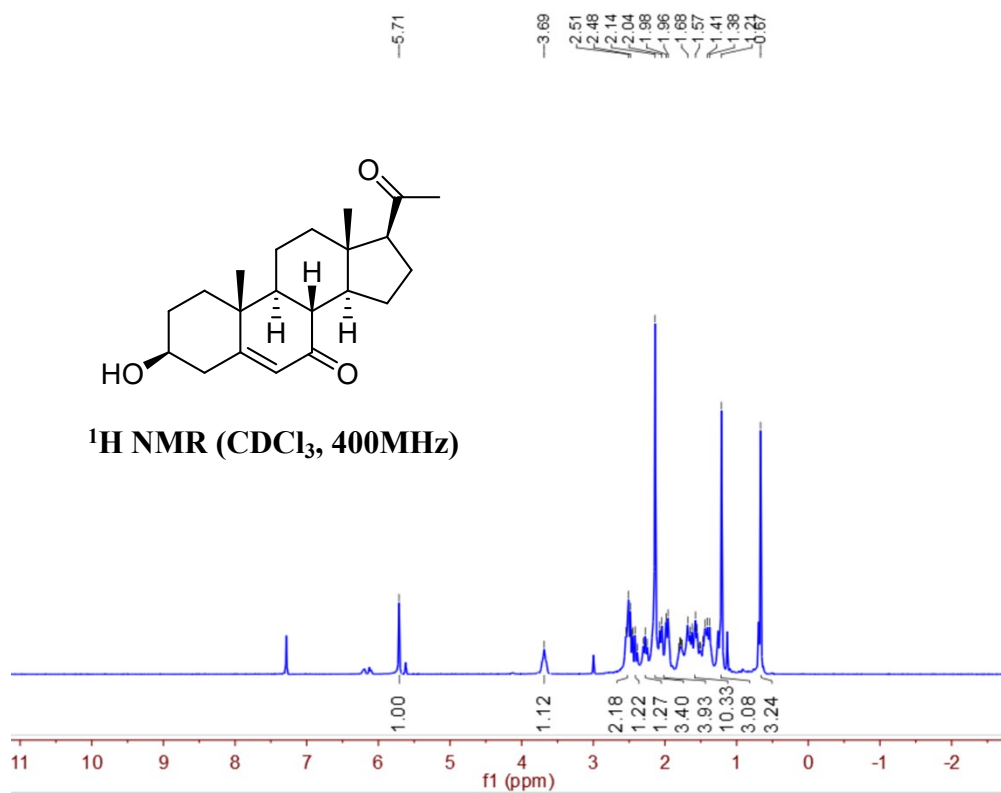

### <sup>1</sup>H NMR Spectrum of Compound 4h

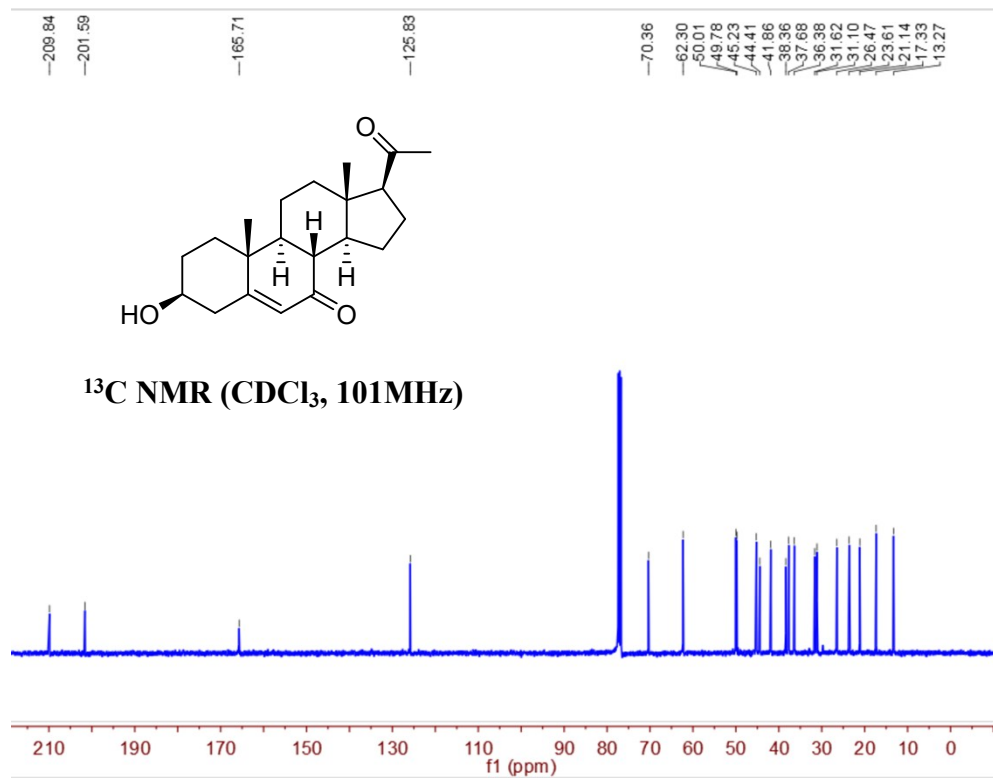

### <sup>13</sup>C NMR Spectrum of Compound 4h

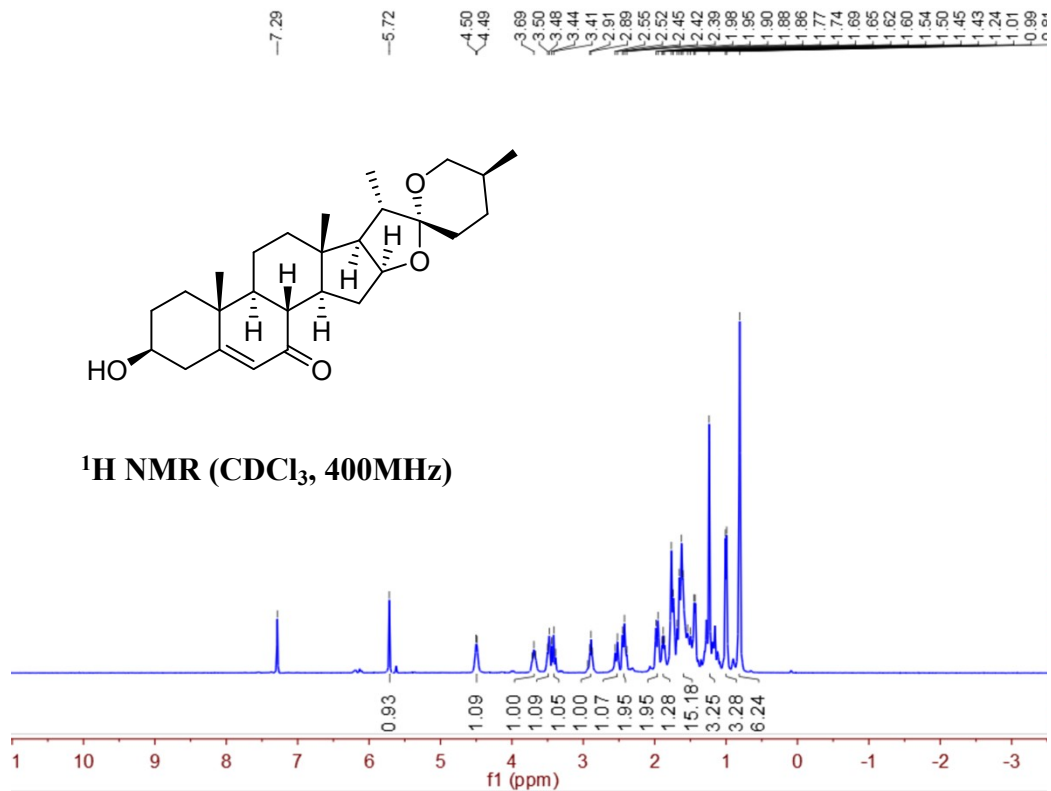

$^1\text{H}$  NMR Spectrum of Compound 4i

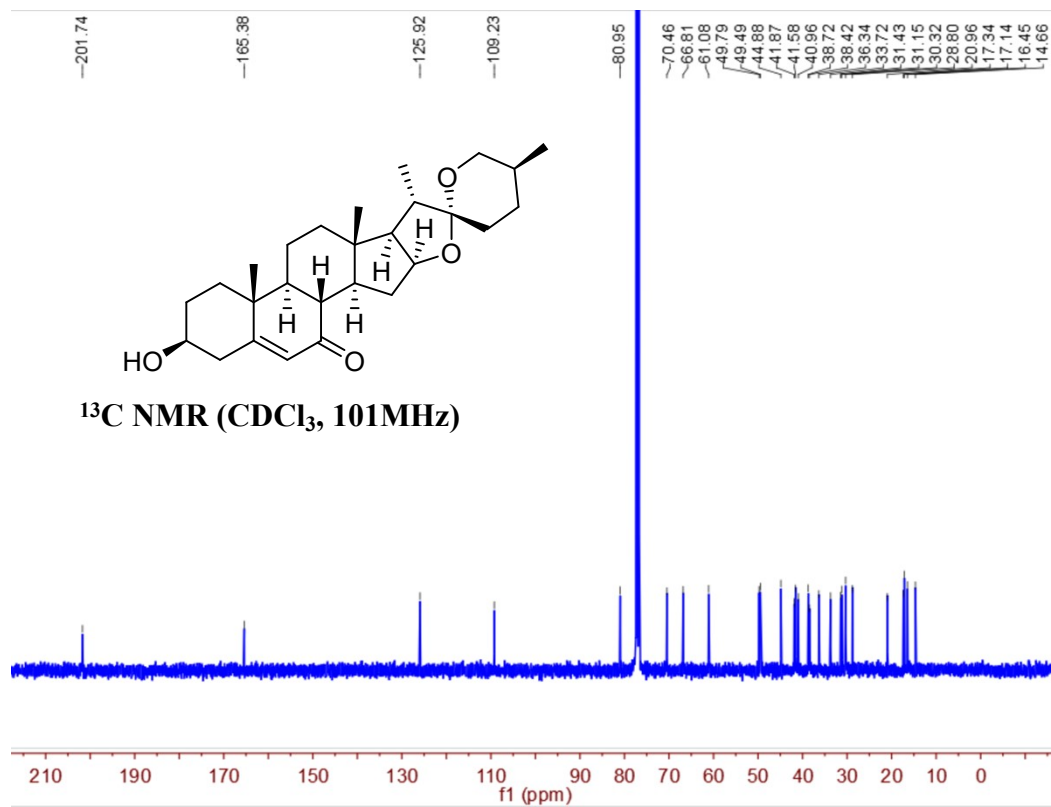

### <sup>13</sup>C NMR Spectrum of Compound 4i

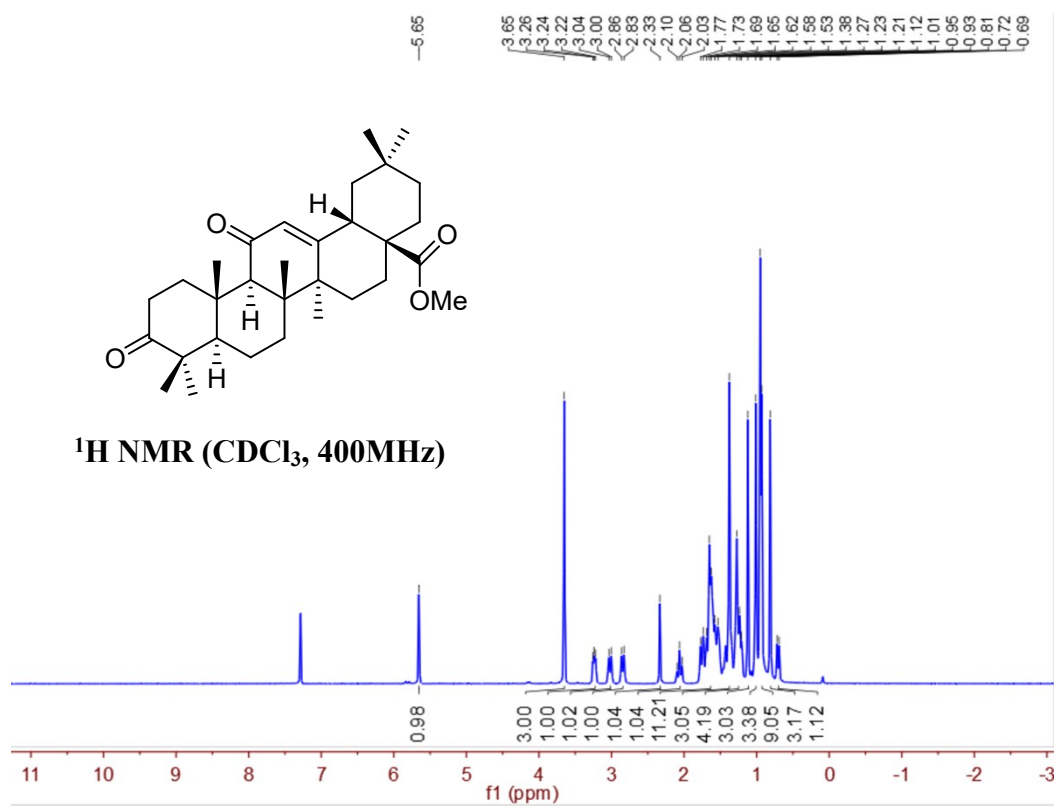

### <sup>1</sup>H NMR Spectrum of Compound 4j

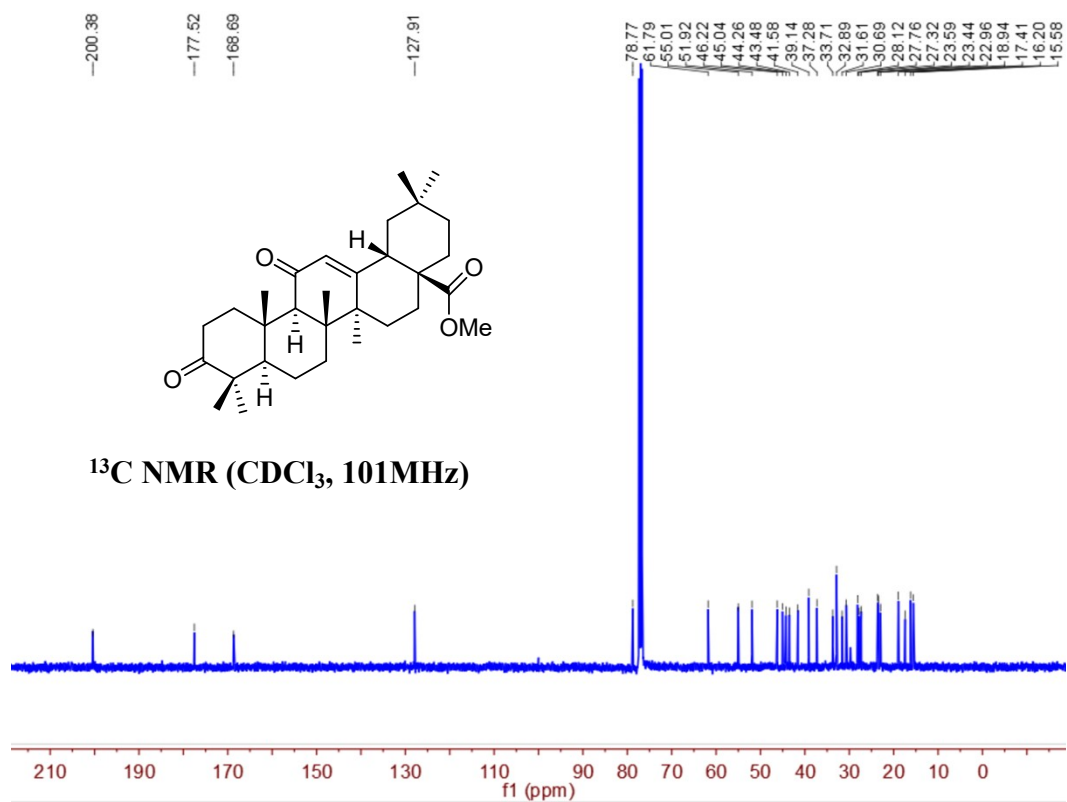

**<sup>13</sup>C NMR Spectrum of Compound 4j**
